# Supplementary material for: The Effects of DNA Methylation on Cytoplasmic Male Sterility in Sugar Beet
Source: MDPI journal article supplement (doi:10.3390/ijms25021118), 2024-01-17

Figure S1 Methylation level and gene expression level of DMGs between CMS line and maintainer line

A: Relative expression levels of differentially methylated genes, B: methylation levels of differentially methylated genes.

Note: "\*" as the p value in 0.01-0.05, "\*\*\*" p value in 0.001-0.01 "\*\*\*\*" p values < 0.001

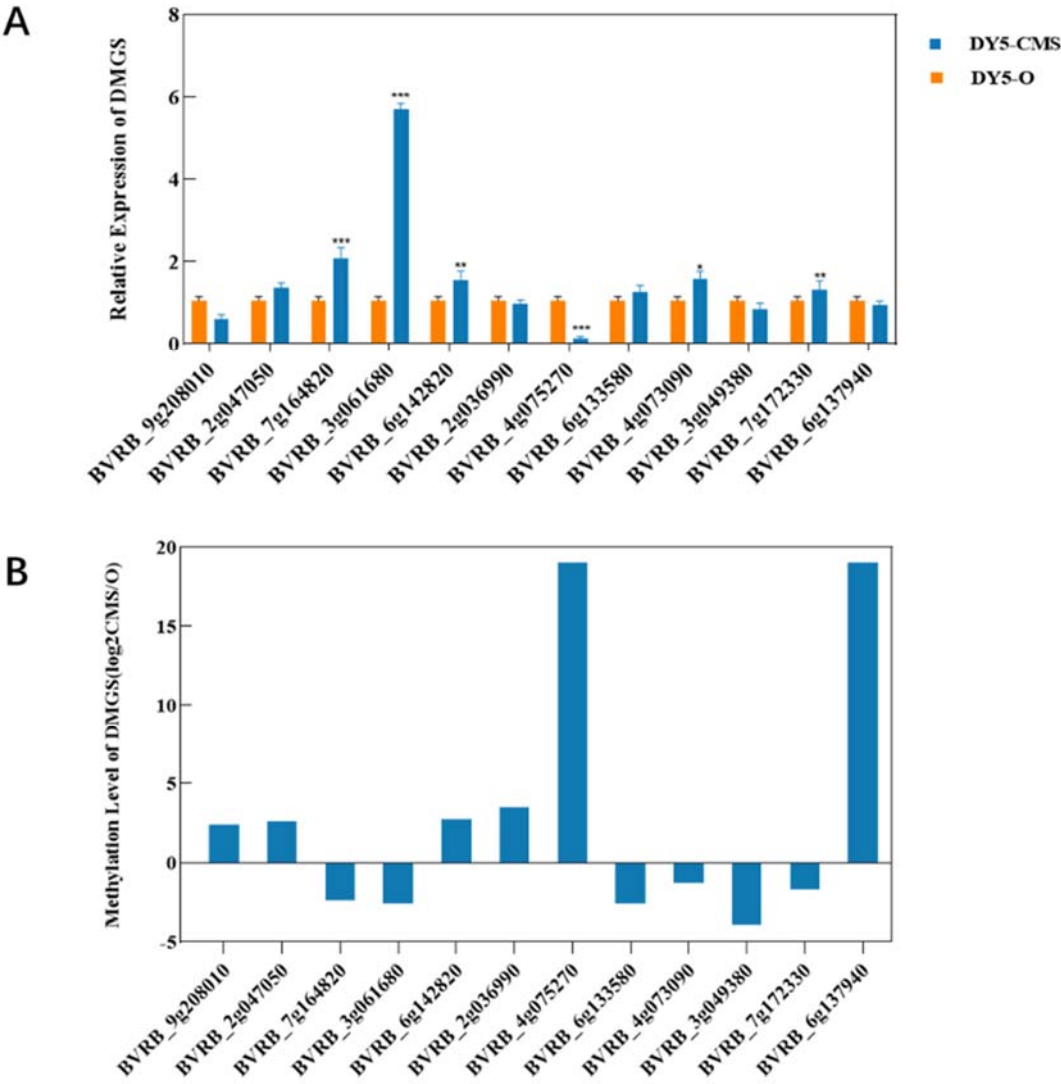

Supplement: s1 [file s1]
