# Supplementary material for: The Effects of DNA Methylation on Cytoplasmic Male Sterility in Sugar Beet
Source: Int J Mol Sci. 2024 Jan 17;25(2):1118. doi: 10.3390/ijms25021118 (PMC10817047; doi:10.3390/ijms25021118)
Supplement: Supplementary file 1 [file ijms-25-01118-s001.zip › Sequencing results.xlsx]

## Sheet: Sheet1
Gene	annotation	Cellular Component	Molecular Function	Biological Process	Kegg Orthology	log2_promoter(CMS/O)	log2_gene(CMS/O)	region
104909120	lysosomal beta glucosidase-like	#N/A	GO:0004553//hydrolase activity, hydrolyzing O-glycosyl compounds	GO:0005975//carbohydrate metabolic process	K05349//beta-glucosidase [EC:3.2.1.21]	-2.266	NA	promoter
104909119	anaphase-promoting complex subunit 4	GO:0005680//anaphase-promoting complex	NA	GO:0048481//plant ovule development;GO:0031145//anaphase-promoting complex-dependent catabolic process;GO:0030071//regulation of mitotic metaphase/anaphase transition;GO:0009793//embryo development ending in seed dormancy	K03351//anaphase-promoting complex subunit 4	NA	-3.38	gene
104909099	endonuclease 1	#N/A	GO:0004519//endonuclease activity;GO:0003676//nucleic acid binding	GO:0006308//DNA catabolic process	NA	NA	2.456	gene
104909085	protein STRUBBELIG-RECEPTOR FAMILY 3-like	GO:0016021//integral component of membrane	GO:0005524//ATP binding;GO:0004672//protein kinase activity	NA	K04733//interleukin-1 receptor-associated kinase 4 [EC:2.7.11.1]	NA	2.136	gene
104909081	putative transcription factor bHLH041	#N/A	GO:0046983//protein dimerization activity	NA	K13422//transcription factor MYC2	NA	1.961	gene
104909076	GDSL esterase/lipase At1g28610-like	GO:0016021//integral component of membrane	GO:0016788//hydrolase activity, acting on ester bonds	NA	K01206//alpha-L-fucosidase [EC:3.2.1.51]	NA	2.305	gene
104909073	bifunctional purple acid phosphatase 26-like	NA	GO:0046872//metal ion binding;GO:0003993//acid phosphatase activity	NA	K22390//acid phosphatase type 7	NA	1.214	gene
104909069	UBP1-associated proteins 1C	NA	GO:0003677//DNA binding	NA	K15263//cell growth-regulating nucleolar protein	NA	2.992	gene
104909064	mitogen-activated protein kinase kinase 2	NA	GO:0004674//protein serine/threonine kinase activity;GO:0005524//ATP binding	NA	K20603//mitogen-activated protein kinase kinase 2 [EC:2.7.12.2]	NA	-1.829	gene
104909058	U-box domain-containing protein 34	NA	GO:0005524//ATP binding;GO:0004672//protein kinase activity;GO:0004842//ubiquitin-protein transferase activity	NA	K04733//interleukin-1 receptor-associated kinase 4 [EC:2.7.11.1]	NA	1.433	gene
104909056	telomere repeat-binding factor 4	GO:0042025//host cell nucleus;GO:0000786//nucleosome	GO:0003677//DNA binding	GO:0006334//nucleosome assembly	K09422//transcription factor MYB, plant	NA	-2.596	gene
104909042	heat stress transcription factor A-7a-like	GO:0042025//host cell nucleus;GO:0005634//nucleus	GO:0043565//sequence-specific DNA binding;GO:0003700//DNA-binding transcription factor activity	NA	K09419//heat shock transcription factor, other eukaryote	NA	1.136	gene
104909032	rab proteins geranylgeranyltransferase component A 2	GO:0005968//Rab-protein geranylgeranyltransferase complex	GO:0017137//Rab GTPase binding;GO:0005092//GDP-dissociation inhibitor activity;GO:0005096//GTPase activator activity	GO:0006886//intracellular protein transport;GO:0007264//small GTPase mediated signal transduction;GO:0018344//protein geranylgeranylation	K17255//Rab GDP dissociation inhibitor	-1.07	NA	promoter
104909025	translation machinery-associated protein 22	GO:0005840//ribosome;GO:0005737//cytoplasm	GO:0003743//translation initiation factor activity	NA	NA	NA	-5.665	gene
104908964	mitochondrial substrate carrier family protein ucpB	GO:0016021//integral component of membrane	GO:0005347//ATP transmembrane transporter activity	NA	K15103//solute carrier family 25 (mitochondrial uncoupling protein), member 8/9;K15106//solute carrier family 25 (mitochondrial carrier), member 14/30	NA	-1.744	gene
104908950	zinc finger CCHC domain-containing protein 9	#N/A	GO:0003697//single-stranded DNA binding;GO:0008270//zinc ion binding;GO:0003676//nucleic acid binding	GO:0006355//regulation of transcription, DNA-templated;GO:0006952//defense response	K09228//KRAB domain-containing zinc finger protein	NA	2.425	gene
104908946	serine/threonine-protein phosphatase 4 regulatory subunit 2-A	GO:0030289//protein phosphatase 4 complex	GO:0019888//protein phosphatase regulator activity	NA	K15425//serine/threonine-protein phosphatase 4 regulatory subunit 2	NA	-2.22	gene
104908944	bidirectional sugar transporter SWEET9-like	GO:0016021//integral component of membrane;GO:0005886//plasma membrane	NA	GO:0008643//carbohydrate transport	K15382//solute carrier family 50 (sugar transporter)	NA	3.936	gene
104908900	flavonoid 3',5'-methyltransferase-like	NA	GO:0008171//O-methyltransferase activity	NA	K00588//caffeoyl-CoA O-methyltransferase [EC:2.1.1.104]	NA	1.236	gene
104908899	U2 snRNP-associated SURP motif-containing protein	#N/A	GO:0003723//RNA binding	GO:0006396//RNA processing	K12842//U2-associated protein SR140	NA	-3.51	gene
104908890	zinc finger CCCH domain-containing protein 11	GO:0005829//cytosol	GO:0046872//metal ion binding	GO:0002181//cytoplasmic translation	K06185//ATP-binding cassette, subfamily F, member 2	1.341	NA	promoter
104908884	thioredoxin-like protein AAED1, chloroplastic	GO:0009507//chloroplast	NA	GO:0055114//oxidation-reduction process	K09839//violaxanthin de-epoxidase [EC:1.23.5.1];K10878//meiotic recombination protein SPO11;K15717//prostamide/prostaglandin F2alpha synthase [EC:1.11.1.20]	NA	3.235	gene
104908873	auxin-binding protein T92	NA	GO:0010011//auxin binding	GO:0000911//cytokinesis by cell plate formation;GO:0009826//unidimensional cell growth;GO:0032877//positive regulation of DNA endoreduplication;GO:0051781//positive regulation of cell division;GO:0045793//positive regulation of cell size	NA	NA	-3.585	gene
104908867	piezo-type mechanosensitive ion channel homolog	GO:0016021//integral component of membrane	NA	NA	K22128//piezo-type mechanosensitive ion channel component 1/2	NA	1.953	gene
104908854	mRNA-capping enzyme-like	GO:0042025//host cell nucleus	GO:0008138//protein tyrosine/serine/threonine phosphatase activity;GO:0004651//polynucleotide 5'-phosphatase activity;GO:0004725//protein tyrosine phosphatase activity;GO:0005525//GTP binding;GO:0004484//mRNA guanylyltransferase activity	GO:0006370//7-methylguanosine mRNA capping	K13917//mRNA-capping enzyme [EC:2.7.7.50 3.6.1.-]	NA	3.109	gene
104908853	ras-related protein RABC2a	#N/A	GO:0005525//GTP binding;GO:0003924//GTPase activity	NA	K07910//Ras-related protein Rab-18	NA	1.879	gene
104908844	transcription factor bHLH13-like	NA	GO:0046983//protein dimerization activity	NA	K22484;K13422//transcription factor MYC2	NA	-1.196	gene
104908826	E3 ubiquitin-protein ligase RFWD3	GO:0005634//nucleus	GO:0004842//ubiquitin-protein transferase activity	GO:0036297//interstrand cross-link repair	K15691//E3 ubiquitin-protein ligase RFWD3 [EC:2.3.2.27]	NA	4.337	gene
104908825	probable xyloglucan endotransglucosylase/hydrolase protein 32	GO:0048046//apoplast;GO:0005618//cell wall	GO:0016762//xyloglucan:xyloglucosyl transferase activity;GO:0004553//hydrolase activity, hydrolyzing O-glycosyl compounds	GO:0010411//xyloglucan metabolic process;GO:0042546//cell wall biogenesis;GO:0071555//cell wall organization	K08235//xyloglucan:xyloglucosyl transferase [EC:2.4.1.207]	NA	3.921	gene
104908811	ethylene-responsive transcription factor-like protein At4g13040	GO:0005634//nucleus	GO:0003677//DNA binding;GO:0003700//DNA-binding transcription factor activity	NA	NA	NA	1.888	gene
104908801	ER lumen protein-retaining receptor-like	GO:0005783//endoplasmic reticulum;GO:0016021//integral component of membrane	GO:0046923//ER retention sequence binding	GO:0006621//protein retention in ER lumen	K10949//ER lumen protein retaining receptor	NA	2.796	gene
104908800	putative ER lumen protein-retaining receptor C28H8.4	GO:0005783//endoplasmic reticulum;GO:0016021//integral component of membrane	GO:0046923//ER retention sequence binding	GO:0006621//protein retention in ER lumen	K10949//ER lumen protein retaining receptor	NA	3.246	gene
104908785	cytochrome P450 82G1	NA	GO:0016705//oxidoreductase activity, acting on paired donors, with incorporation or reduction of molecular oxygen;GO:0020037//heme binding;GO:0097007//4,8,12-trimethyltrideca-1,3,7,11-tetraene synthase activity;GO:0005506//iron ion binding;GO:0004497//monooxygenase activity;GO:0097008//(3E)-4,8-dimethyl-1,3,7-nonatriene synthase activity	GO:0046246//terpene biosynthetic process;GO:1901045//negative regulation of oviposition;GO:0050832//defense response to fungus;GO:0009617//response to bacterium;GO:0002213//defense response to insect	K17961	NA	5.011	gene
104908740	adenine/guanine permease AZG2-like	GO:0016021//integral component of membrane	GO:0005345//purine nucleobase transmembrane transporter activity	NA	K06901	-1.509	NA	promoter
104908697	betaine aldehyde dehydrogenase, chloroplastic-like	GO:0009507//chloroplast	GO:0016620//oxidoreductase activity, acting on the aldehyde or oxo group of donors, NAD or NADP as acceptor;GO:0008802//betaine-aldehyde dehydrogenase activity	GO:0019285//glycine betaine biosynthetic process from choline	K00130//betaine-aldehyde dehydrogenase [EC:1.2.1.8]	NA	5.669	gene
104908666	mannosyl-oligosaccharide 1,2-alpha-mannosidase MNS1	GO:0016020//membrane	GO:0004571//mannosyl-oligosaccharide 1,2-alpha-mannosidase activity;GO:0005509//calcium ion binding	GO:0008152//metabolic process	K01230//mannosyl-oligosaccharide alpha-1,2-mannosidase [EC:3.2.1.113]	NA	1.932	gene
104908595	lysosomal Pro-X carboxypeptidase	GO:0016021//integral component of membrane	GO:0008236//serine-type peptidase activity	NA	K01285//lysosomal Pro-X carboxypeptidase [EC:3.4.16.2]	NA	-2.34	gene
104908531	chaperonin 60 subunit alpha 2, chloroplastic	#N/A	GO:0005524//ATP binding	GO:0042026//protein refolding	K04077//chaperonin GroEL	NA	2.615	gene
104908526	potassium transporter 2	GO:0016021//integral component of membrane	GO:0015079//potassium ion transmembrane transporter activity	NA	K03549//KUP system potassium uptake protein	-1.718	NA	promoter
104908525	calcium-binding mitochondrial carrier protein SCaMC-1-like	GO:0016021//integral component of membrane	GO:0005347//ATP transmembrane transporter activity;GO:0005509//calcium ion binding	NA	K14684//solute carrier family 25 (mitochondrial phosphate transporter), member 23/24/25/41	NA	-2.071	gene
104908524	endonuclease 8-like 3	NA	GO:0008270//zinc ion binding;GO:0003676//nucleic acid binding	NA	K10569//endonuclease VIII-like 3	NA	-2.343	gene
104908517	elongator complex protein 2	#N/A	NA	GO:1901535//regulation of DNA demethylation;GO:0044030//regulation of DNA methylation;GO:0016573//histone acetylation	K11374//elongator complex protein 2	NA	-5.36	gene
104908482	E3 ubiquitin protein ligase RIE1-like	GO:0016021//integral component of membrane	NA	NA	K13148//integrator complex subunit 11 [EC:3.1.27.-]	NA	6.62	gene
104908477	probable lysine-specific demethylase ELF6	GO:0005634//nucleus	GO:0003676//nucleic acid binding	GO:0009826//unidimensional cell growth;GO:0048577//negative regulation of short-day photoperiodism, flowering;GO:0009741//response to brassinosteroid;GO:0033169//histone H3-K9 demethylation;GO:0048579//negative regulation of long-day photoperiodism, flowering	K11446//histone demethylase JARID1 [EC:1.14.11.-]	NA	2.445	gene
104908463	non-functional NADPH-dependent codeinone reductase 2-like	NA	GO:0016491//oxidoreductase activity	NA	K22374	NA	-6.431	gene
104908459	TMV resistance protein N-like	NA	GO:0043531//ADP binding	GO:0007165//signal transduction	K22038//volume-regulated anion channel	-1.033	-5.629	both
104908457	4-hydroxy-tetrahydrodipicolinate reductase 2, chloroplastic-like	#N/A	GO:0070402//NADPH binding;GO:0008839//4-hydroxy-tetrahydrodipicolinate reductase	GO:0009089//lysine biosynthetic process via diaminopimelate	K00215	NA	1.802	gene
104908452	DEAD-box ATP-dependent RNA helicase 22	GO:0009507//chloroplast	GO:0005524//ATP binding;GO:0003676//nucleic acid binding	NA	K12823//ATP-dependent RNA helicase DDX5/DBP2 [EC:3.6.4.13];K14806//ATP-dependent RNA helicase DDX31/DBP7 [EC:3.6.4.13];K12858//ATP-dependent RNA helicase DDX23/PRP28 [EC:3.6.4.13];K14805//ATP-dependent RNA helicase DDX24/MAK5 [EC:3.6.4.13]	NA	1.516	gene
104908446	adenine/guanine permease AZG1	GO:0016021//integral component of membrane	GO:0022857//transmembrane transporter activity	NA	K06901	NA	2.164	gene
104908409	putative leucine-rich repeat receptor-like serine/threonine-protein kinase At2g14440	GO:0005768//endosome;GO:0016021//integral component of membrane;GO:0005802//trans-Golgi network;GO:0005886//plasma membrane;GO:0005773//vacuole	NA	NA	K13420	NA	-1.22	gene
104908403	serine/threonine-protein kinase STN7, chloroplastic	NA	GO:0005524//ATP binding;GO:0004672//protein kinase activity	NA	K07760	NA	-4.55	gene
104908401	NAC domain-containing protein 8	GO:0005634//nucleus	GO:0003677//DNA binding	GO:0000077//DNA damage checkpoint;GO:0006355//regulation of transcription, DNA-templated;GO:0040020//regulation of meiotic nuclear division;GO:0010332//response to gamma radiation	NA	NA	1.168	gene
104908394	polygalacturonase At1g48100	GO:0005576//extracellular region	GO:0004650//polygalacturonase activity	GO:0005975//carbohydrate metabolic process;GO:0071555//cell wall organization	K01213	NA	2.872	gene
104908393	2-phytyl-1,4-beta-naphthoquinone methyltransferase, chloroplastic	GO:0009507//chloroplast	GO:0052624//2-phytyl-1,4-naphthoquinone methyltransferase activity	GO:0042372//phylloquinone biosynthetic process;GO:0032259//methylation	K23095	NA	1.076	gene
104908392	homeobox protein knotted-1-like 6	GO:0005634//nucleus	GO:0043565//sequence-specific DNA binding	GO:0006355//regulation of transcription, DNA-templated	K16670//homeobox protein Meis2	NA	-5.554	gene
104908386	chaperone protein dnaJ 15	#N/A	NA	GO:0009958//positive gravitropism	K03686//molecular chaperone DnaJ;K09517//DnaJ homolog subfamily B member 11;K09510//DnaJ homolog subfamily B member 4;K14566//U3 small nucleolar RNA-associated protein 24	-1.131	NA	promoter
104908385	glutamine--tRNA ligase-like	GO:0005737//cytoplasm	GO:0005524//ATP binding;GO:0004819//glutamine-tRNA ligase activity	GO:0006425//glutaminyl-tRNA aminoacylation	K01886//glutaminyl-tRNA synthetase [EC:6.1.1.18]	NA	-1.455	gene
104908382	protein VAC14 homolog	GO:0005774//vacuolar membrane;GO:0010008//endosome membrane;GO:0000306//extrinsic component of vacuolar membrane;GO:0070772//PAS complex	NA	GO:0033674//positive regulation of kinase activity;GO:0006661//phosphatidylinositol biosynthetic process	K15305//vacuole morphology and inheritance protein 14	NA	-3.234	gene
104908375	ABC transporter B family member 25, mitochondrial	GO:0016021//integral component of membrane	GO:0005524//ATP binding;GO:0042626//ATPase-coupled transmembrane transporter activity;GO:0016887//ATPase activity	NA	K05663//mitochondrial ABC transporter ATM	NA	-1.57	gene
104908366	phosphatase IMPL1, chloroplastic	GO:0005829//cytosol;GO:0009570//chloroplast stroma	GO:0046872//metal ion binding;GO:0052833//inositol monophosphate 4-phosphatase activity;GO:0052832//inositol monophosphate 3-phosphatase activity;GO:0008934//inositol monophosphate 1-phosphatase activity	GO:0006021//inositol biosynthetic process;GO:0046855//inositol phosphate dephosphorylation;GO:0046854//phosphatidylinositol phosphorylation	K01092//myo-inositol-1(or 4)-monophosphatase [EC:3.1.3.25]	NA	-1.541	gene
104908364	probable acyl-activating enzyme 17, peroxisomal	#N/A	GO:0003824//catalytic activity	NA	K15164//mediator of RNA polymerase II transcription subunit 13;K01895//acetyl-CoA synthetase [EC:6.2.1.1]	1.839	20.75	both
104908363	calcium sensing receptor, chloroplastic	GO:0009535//chloroplast thylakoid membrane;GO:0005739//mitochondrion	NA	GO:0090333//regulation of stomatal closure;GO:0071277//cellular response to calcium ion;GO:0009704//de-etiolation	NA	NA	1.866	gene
104908346	valine--tRNA ligase-like	#N/A	GO:0004832//valine-tRNA ligase activity;GO:0005524//ATP binding;GO:0002161//aminoacyl-tRNA editing activity	GO:0006438//valyl-tRNA aminoacylation	K01873//valyl-tRNA synthetase [EC:6.1.1.9]	NA	-1.306	gene
104908335	gastric triacylglycerol lipase	GO:0016021//integral component of membrane	NA	GO:0006629//lipid metabolic process	K01052//lysosomal acid lipase/cholesteryl ester hydrolase [EC:3.1.1.13]	NA	-1.887	gene
104908332	histone deacetylase 15	#N/A	GO:0046872//metal ion binding;GO:0016787//hydrolase activity	GO:0009294//DNA mediated transformation	K11407//histone deacetylase 6 [EC:3.5.1.98]	NA	-1.712	gene
104908330	protein DENND6A	#N/A	GO:0017112//Rab guanyl-nucleotide exchange factor activity	NA	NA	NA	3.824	gene
104908322	60S ribosomal protein L2, mitochondrial	GO:0015934//large ribosomal subunit	GO:0003723//RNA binding;GO:0016740//transferase activity;GO:0003735//structural constituent of ribosome	GO:0006412//translation	K02886//large subunit ribosomal protein L2	NA	2.137	gene
104908321	40S ribosomal protein S9-2-like	GO:0015935//small ribosomal subunit	GO:0003735//structural constituent of ribosome;GO:0019843//rRNA binding	GO:0006412//translation	K02997//small subunit ribosomal protein S9e	NA	-1.91	gene
104908308	prolyl 4-hydroxylase 1	GO:0016021//integral component of membrane;GO:0000137//Golgi cis cisterna	GO:0016705//oxidoreductase activity, acting on paired donors, with incorporation or reduction of molecular oxygen;GO:0004656//procollagen-proline 4-dioxygenase activity;GO:0005506//iron ion binding;GO:0031418//L-ascorbic acid binding	GO:0018401//peptidyl-proline hydroxylation to 4-hydroxy-L-proline	K00472//prolyl 4-hydroxylase [EC:1.14.11.2]	NA	3.622	gene
104908261	ATP-dependent RNA helicase DHX36	#N/A	GO:0003723//RNA binding;GO:0005524//ATP binding;GO:0004386//helicase activity	NA	K14442//ATP-dependent RNA helicase DHX36 [EC:3.6.4.13]	NA	3.813	gene
104908254	bifunctional aspartate aminotransferase and glutamate/aspartate-prephenate aminotransferase	NA	GO:0003824//catalytic activity;GO:0030170//pyridoxal phosphate binding	GO:0009058//biosynthetic process	K15849	NA	1.495	gene
104908243	probable protein phosphatase 2C 8	#N/A	GO:0004722//protein serine/threonine phosphatase activity	NA	K17500//integrin-linked kinase-associated serine/threonine phosphatase 2C [EC:3.1.3.16]	NA	6.945	gene
104908221	transcription initiation factor TFIID subunit 2	GO:0009506//plasmodesma;GO:0005669//transcription factor TFIID complex	GO:0008237//metallopeptidase activity;GO:0008270//zinc ion binding	NA	K03128//transcription initiation factor TFIID subunit 2	NA	21.193	gene
104908218	conserved oligomeric Golgi complex subunit 6	GO:0017119//Golgi transport complex;GO:0005829//cytosol;GO:0000139//Golgi membrane	NA	GO:0015031//protein transport;GO:0006891//intra-Golgi vesicle-mediated transport	K20293//conserved oligomeric Golgi complex subunit 6	NA	1.778	gene
104908214	peptidyl-prolyl cis-trans isomerase CYP26-2, chloroplastic	GO:0009507//chloroplast	GO:0003755//peptidyl-prolyl cis-trans isomerase activity	NA	K03768//peptidyl-prolyl cis-trans isomerase B (cyclophilin B) [EC:5.2.1.8]	NA	1.389	gene
104908211	bidirectional sugar transporter SWEET7-like	GO:0016021//integral component of membrane;GO:0005886//plasma membrane	NA	GO:0008643//carbohydrate transport	K15382//solute carrier family 50 (sugar transporter)	NA	4.34	gene
104908205	histone H4-like	GO:0042025//host cell nucleus;GO:0005634//nucleus;GO:0000786//nucleosome	GO:0003677//DNA binding;GO:0046982//protein heterodimerization activity	GO:0006334//nucleosome assembly	K11254//histone H4	NA	1.134	gene
104908200	26S proteasome non-ATPase regulatory subunit 8 homolog A	GO:0005838//proteasome regulatory particle	NA	GO:0006508//proteolysis	K03031//26S proteasome regulatory subunit N12	NA	-1.002	gene
104908197	30S ribosomal protein S6 alpha, chloroplastic	GO:0005840//ribosome;GO:0009507//chloroplast	GO:0003735//structural constituent of ribosome;GO:0019843//rRNA binding	GO:0006412//translation	K02990//small subunit ribosomal protein S6	NA	3.304	gene
104908178	protein TORNADO 2	GO:0016021//integral component of membrane	NA	NA	K00128//aldehyde dehydrogenase (NAD+) [EC:1.2.1.3];K17345//tetraspanin-5;K17356//tetraspanin-13/31	NA	-1.065	gene
104908171	tetraketide alpha-pyrone reductase 1-like	NA	GO:0003854//3-beta-hydroxy-delta5-steroid dehydrogenase activity	GO:0006694//steroid biosynthetic process	K09753//cinnamoyl-CoA reductase [EC:1.2.1.44]	NA	3.038	gene
104908146	peroxidase 57-like	#N/A	GO:0046872//metal ion binding;GO:0020037//heme binding;GO:0004601//peroxidase activity	GO:0006979//response to oxidative stress;GO:0042744//hydrogen peroxide catabolic process	K00430//peroxidase [EC:1.11.1.7]	NA	-3.832	gene
104908134	transcription initiation factor TFIID subunit 12	GO:0000124//SAGA complex;GO:0046695//SLIK (SAGA-like) complex;GO:0005669//transcription factor TFIID complex	GO:0003743//translation initiation factor activity;GO:0046982//protein heterodimerization activity	GO:0006352//DNA-templated transcription, initiation	K03126//transcription initiation factor TFIID subunit 12	NA	3.552	gene
104908112	proteasome subunit beta type-2-A	GO:0005634//nucleus;GO:0005737//cytoplasm;GO:0005839//proteasome core complex	GO:0004298//threonine-type endopeptidase activity	GO:0051603//proteolysis involved in cellular protein catabolic process	K02734//20S proteasome subunit beta 4 [EC:3.4.25.1]	NA	2.417	gene
104908111	vicilin-like antimicrobial peptides 2-2	#N/A	GO:0045735//nutrient reservoir activity	NA	K18626//trichohyalin	NA	-2.874	gene
104908096	ABC transporter A family member 12-like	GO:0016021//integral component of membrane	GO:0005524//ATP binding;GO:0042626//ATPase-coupled transmembrane transporter activity;GO:0016887//ATPase activity	NA	K05643//ATP-binding cassette, subfamily A (ABC1), member 3	-4.645	-4.645	both
104908070	sucrose transport protein SUC4	GO:0009705//plant-type vacuole membrane;GO:0005887//integral component of plasma membrane;GO:0005801//cis-Golgi network	GO:0008515//sucrose transmembrane transporter activity	NA	K15378//solute carrier family 45, member 1/2/4	-0.462	2.999	both
104908033	probable WRKY transcription factor 75	GO:0005634//nucleus	GO:0043565//sequence-specific DNA binding;GO:0003700//DNA-binding transcription factor activity	NA	K13424//WRKY transcription factor 33;K12835//ATP-dependent RNA helicase DDX42 [EC:3.6.4.13]	NA	-2.986	gene
104908026	CBS domain-containing protein CBSCBSPB1	GO:0016021//integral component of membrane	NA	NA	K13436//pto-interacting protein 1 [EC:2.7.11.1]	3.042	0.178	both
104908019	clustered mitochondria protein	GO:0005737//cytoplasm	GO:0003723//RNA binding	GO:0048312//intracellular distribution of mitochondria	K03255//protein TIF31	NA	3.772	gene
104908008	elongation factor 1-delta-like	GO:0005853//eukaryotic translation elongation factor 1 complex	GO:0003746//translation elongation factor activity	NA	K03232//elongation factor 1-beta	1.064	NA	promoter
104908006	exocyst complex component SEC6	GO:0009506//plasmodesma;GO:0000145//exocyst;GO:0005829//cytosol;GO:0005886//plasma membrane	NA	GO:0060321//acceptance of pollen;GO:0006887//exocytosis	K06110//exocyst complex component 3	NA	4.715	gene
104908004	malate dehydrogenase, chloroplastic-like	#N/A	GO:0030060//L-malate dehydrogenase activity	GO:0006099//tricarboxylic acid cycle;GO:0005975//carbohydrate metabolic process;GO:0006108//malate metabolic process	K00026//malate dehydrogenase [EC:1.1.1.37]	NA	1.352	gene
104907977	endo-1,3;1,4-beta-D-glucanase	#N/A	GO:0016787//hydrolase activity	NA	K01061//carboxymethylenebutenolidase [EC:3.1.1.45]	NA	-5.682	gene
104907968	pyridoxine/pyridoxamine 5'-phosphate oxidase 2	#N/A	GO:0004733//pyridoxamine-phosphate oxidase activity;GO:0010181//FMN binding	GO:0008615//pyridoxine biosynthetic process	K00275//pyridoxamine 5'-phosphate oxidase [EC:1.4.3.5]	-4.778	NA	promoter
104907961	caffeic acid 3-O-methyltransferase-like	NA	GO:0008171//O-methyltransferase activity;GO:0046983//protein dimerization activity	GO:0032259//methylation	K13066//caffeic acid 3-O-methyltransferase [EC:2.1.1.68]	2.353	2.353	both
104907950	peroxiredoxin-2F, mitochondrial	GO:0005759//mitochondrial matrix	GO:0004601//peroxidase activity;GO:0051920//peroxiredoxin activity	GO:0006979//response to oxidative stress;GO:0046686//response to cadmium ion;GO:0045454//cell redox homeostasis	K03386//peroxiredoxin (alkyl hydroperoxide reductase subunit C) [EC:1.11.1.15];K11187//peroxiredoxin 5, atypical 2-Cys peroxiredoxin [EC:1.11.1.15]	NA	1.537	gene
104907915	zinc finger CCCH domain-containing protein 55	NA	GO:0003723//RNA binding;GO:0046872//metal ion binding	GO:0006396//RNA processing	K02184//formin 2	NA	1.498	gene
104907901	glycerophosphodiester phosphodiesterase GDPD6-like	#N/A	GO:0008081//phosphoric diester hydrolase activity	GO:0006629//lipid metabolic process	K01126//glycerophosphoryl diester phosphodiesterase [EC:3.1.4.46]	NA	-5.082	gene
104907898	glycerophosphodiester phosphodiesterase GDPD5-like	#N/A	GO:0008081//phosphoric diester hydrolase activity	GO:0006629//lipid metabolic process	K01126//glycerophosphoryl diester phosphodiesterase [EC:3.1.4.46]	-1.177	3.244	both
104907888	pentatricopeptide repeat-containing protein At3g12770	NA	GO:0008270//zinc ion binding	NA	K06180;K22733//magnesium transporter	NA	-1.212	gene
104907881	laccase-6	GO:0048046//apoplast	GO:0052716//hydroquinone:oxygen oxidoreductase activity;GO:0005507//copper ion binding	GO:0046274//lignin catabolic process	K05909//laccase [EC:1.10.3.2]	-1.617	NA	promoter
104907877	activating signal cointegrator 1 complex subunit 3	NA	GO:0005524//ATP binding;GO:0003676//nucleic acid binding	NA	K18663//activating signal cointegrator complex subunit 3 [EC:3.6.4.12]	NA	-6.588	gene
104907873	probable methyltransferase PMT14	GO:0016021//integral component of membrane	GO:0008168//methyltransferase activity	GO:0032259//methylation	K12175//COP9 signalosome complex subunit 1;K15449//tRNA wybutosine-synthesizing protein 1 [EC:4.1.3.44]	-4.797	NA	promoter
104907859	multiple C2 and transmembrane domain-containing protein 1-like	GO:0016021//integral component of membrane;GO:0031982//vesicle	NA	NA	K04733//interleukin-1 receptor-associated kinase 4 [EC:2.7.11.1];K00549//5-methyltetrahydropteroyltriglutamate--homocysteine methyltransferase [EC:2.1.1.14]	NA	-2.475	gene
104907855	probable serine/threonine-protein kinase At5g41260	#N/A	GO:0005524//ATP binding;GO:0004672//protein kinase activity	NA	K14500//BR-signaling kinase [EC:2.7.11.1]	NA	2.618	gene
104907854	lysine-specific demethylase 5A	GO:0005634//nucleus	GO:0046872//metal ion binding;GO:0003677//DNA binding	NA	K11446//histone demethylase JARID1 [EC:1.14.11.-]	NA	-1.297	gene
104907851	histidine triad nucleotide-binding protein 3	#N/A	GO:0003824//catalytic activity	NA	K22966//sulfate adenylyltransferase (ADP) / adenylylsulfatase [EC:2.7.7.5 3.6.2.1]	-1.013	-1.434	both
104907847	protein arginine N-methyltransferase 1.6	#N/A	GO:0016274//protein-arginine N-methyltransferase activity	NA	K11438//type III protein arginine methyltransferase [EC:2.1.1.321]	-1.013	NA	promoter
104907841	protein transport protein SEC16B homolog	GO:0005783//endoplasmic reticulum;GO:0000139//Golgi membrane	NA	GO:0048208//COPII vesicle coating;GO:0015031//protein transport	K20353//COPII coat assembly protein SEC16	NA	1.28	gene
104907837	putative serine/threonine-protein kinase	GO:0016021//integral component of membrane	GO:0004674//protein serine/threonine kinase activity;GO:0005524//ATP binding	NA	K04733//interleukin-1 receptor-associated kinase 4 [EC:2.7.11.1];K01180//endo-1,3(4)-beta-glucanase [EC:3.2.1.6]	NA	1.025	gene
104907834	glutamate--cysteine ligase, chloroplastic	GO:0009507//chloroplast	GO:0005524//ATP binding;GO:0004357//glutamate-cysteine ligase activity	GO:0006750//glutathione biosynthetic process	K01919	NA	4.762	gene
104907804	ribosome-inactivating protein cucurmosin-like	#N/A	GO:0030598//rRNA N-glycosylase activity;GO:0090729//toxin activity	GO:0017148//negative regulation of translation;GO:0006952//defense response	NA	1.335	NA	promoter
104907800	exocyst complex component EXO70A1-like	GO:0000145//exocyst	NA	GO:0015031//protein transport;GO:0006887//exocytosis	K07195//exocyst complex component 7	NA	-2.158	gene
104907781	transcription factor DIVARICATA	GO:0005634//nucleus	GO:0003677//DNA binding	NA	K05909//laccase [EC:1.10.3.2];K08869//aarF domain-containing kinase;K09522//DnaJ homolog subfamily C member 2;K17613//calcineurin-binding protein cabin-1	NA	1.432	gene
104907774	ultraviolet-B receptor UVR8	GO:0005634//nucleus;GO:0005829//cytosol;GO:0000785//chromatin	GO:0003682//chromatin binding;GO:0042803//protein homodimerization activity;GO:0009881//photoreceptor activity	GO:0009649//entrainment of circadian clock;GO:0010224//response to UV-B	K10614//E3 ubiquitin-protein ligase HERC3 [EC:2.3.2.26]	NA	1.074	gene
104907755	RNA-binding protein 42	#N/A	GO:0003723//RNA binding	NA	K13201//nucleolysin TIA-1/TIAR	NA	2.037	gene
104907754	lysine-specific demethylase JMJ18	GO:0005634//nucleus	NA	NA	K11446//histone demethylase JARID1 [EC:1.14.11.-]	3.044	NA	promoter
104907738	MLO-like protein 14	GO:0016021//integral component of membrane	GO:0005516//calmodulin binding	GO:0006952//defense response;GO:0009607//response to biotic stimulus	K08472//mlo protein	3.48	NA	promoter
104907725	3-deoxy-manno-octulosonate cytidylyltransferase, mitochondrial	GO:0016021//integral component of membrane	GO:0008690//3-deoxy-manno-octulosonate cytidylyltransferase activity	NA	K00979	3.203	NA	promoter
104907719	cytochrome c oxidase copper chaperone 1	GO:0016021//integral component of membrane;GO:0005758//mitochondrial intermembrane space	GO:0004527//exonuclease activity;GO:0004674//protein serine/threonine kinase activity;GO:0005524//ATP binding;GO:0008270//zinc ion binding;GO:0016531//copper chaperone activity;GO:0003676//nucleic acid binding	GO:0015074//DNA integration;GO:0006825//copper ion transport	K03006//DNA-directed RNA polymerase II subunit RPB1 [EC:2.7.7.6];K01191//alpha-mannosidase [EC:3.2.1.24];K02260//cytochrome c oxidase assembly protein subunit 17	NA	2.235	gene
104907718	photosystem I subunit O	GO:0016021//integral component of membrane;GO:0009522//photosystem I;GO:0009507//chloroplast	NA	GO:0009767//photosynthetic electron transport chain	K14332	-1.118	NA	promoter
104907697	protein ABCI12, chloroplastic	GO:0016021//integral component of membrane;GO:0009507//chloroplast	NA	NA	K14498//serine/threonine-protein kinase SRK2 [EC:2.7.11.1]	NA	2.523	gene
104907693	phosphatidylserine decarboxylase proenzyme 3-like	GO:0016020//membrane	GO:0005509//calcium ion binding;GO:0004609//phosphatidylserine decarboxylase activity	GO:0006646//phosphatidylethanolamine biosynthetic process;GO:0016540//protein autoprocessing	K01613//phosphatidylserine decarboxylase [EC:4.1.1.65]	NA	22.976	gene
104907692	putative clathrin assembly protein At1g03050	GO:0030136//clathrin-coated vesicle	GO:0030276//clathrin binding;GO:0005545//1-phosphatidylinositol binding	GO:0048268//clathrin coat assembly	K20043//clathrin coat assembly protein AP180;K20044//phosphatidylinositol-binding clathrin assembly protein	NA	22.976	gene
104907682	probable low-specificity L-threonine aldolase 1	NA	GO:0016829//lyase activity;GO:0004793//threonine aldolase activity	GO:0006520//cellular amino acid metabolic process;GO:0006567//threonine catabolic process	K01620//threonine aldolase [EC:4.1.2.48]	NA	2.134	gene
104907681	serine/threonine protein phosphatase 2A regulatory subunit B''beta-like	#N/A	GO:0005509//calcium ion binding	NA	K11583//serine/threonine-protein phosphatase 2A regulatory subunit B''	NA	3.98	gene
104907680	casein kinase I-like	GO:0005634//nucleus;GO:0005737//cytoplasm	GO:0004674//protein serine/threonine kinase activity;GO:0005524//ATP binding;GO:0004672//protein kinase activity	GO:0018105//peptidyl-serine phosphorylation	K08960//casein kinase 1, epsilon [EC:2.7.11.1];K08959//casein kinase 1, delta [EC:2.7.11.1]	NA	-2.592	gene
104907679	transcription factor FAMA-like	#N/A	GO:0046983//protein dimerization activity	NA	K20558	NA	4.185	gene
104907672	exportin-4	#N/A	GO:0005049//nuclear export signal receptor activity	NA	K18460//exportin-7	1.051	5.985	both
104907662	protein RST1	GO:0016021//integral component of membrane;GO:0005737//cytoplasm	NA	GO:1900369//negative regulation of RNA interference;GO:0006723//cuticle hydrocarbon biosynthetic process;GO:0009793//embryo development ending in seed dormancy;GO:0043447//alkane biosynthetic process	NA	NA	2.788	gene
104907619	probable pectinesterase/pectinesterase inhibitor 25	NA	GO:0045330//aspartyl esterase activity;GO:0004857//enzyme inhibitor activity;GO:0046910//pectinesterase inhibitor activity;GO:0030599//pectinesterase activity	GO:0045490//pectin catabolic process;GO:0042545//cell wall modification	K01051//pectinesterase [EC:3.1.1.11]	NA	2.925	gene
104907616	ethylene-responsive transcription factor WRI1	GO:0005634//nucleus	GO:0003677//DNA binding;GO:0003700//DNA-binding transcription factor activity	NA	K09285	NA	-1.446	gene
104907608	structural maintenance of chromosomes protein 5	GO:0030915//Smc5-Smc6 complex	NA	GO:0007062//sister chromatid cohesion;GO:0000724//double-strand break repair via homologous recombination	K22803//structural maintenance of chromosomes protein 5	NA	4.1	gene
104907597	DNA repair protein recA homolog 1, chloroplastic	#N/A	GO:0003697//single-stranded DNA binding;GO:0005524//ATP binding;GO:0008094//DNA-dependent ATPase activity	GO:0006281//DNA repair;GO:0006310//DNA recombination	K03553	NA	2.945	gene
104907564	myosin-11-like	GO:0016459//myosin complex	GO:0003779//actin binding;GO:0005524//ATP binding;GO:0003774//motor activity	GO:0007015//actin filament organization	K10357//myosin V	NA	-1.014	gene
104907538	putative DNA-binding protein ESCAROLA	#N/A	GO:0003680//AT DNA binding	NA	K23047//E3 ubiquitin-protein ligase UNKL [EC:2.3.2.27]	NA	4.101	gene
104907529	glutamine--fructose-6-phosphate aminotransferase [isomerizing] 2	#N/A	GO:0097367//carbohydrate derivative binding	GO:1901135//carbohydrate derivative metabolic process	K00820//glucosamine---fructose-6-phosphate aminotransferase (isomerizing) [EC:2.6.1.16]	NA	3.513	gene
104907512	elongation factor 1-delta-like	GO:0005853//eukaryotic translation elongation factor 1 complex	GO:0003746//translation elongation factor activity	NA	K03232//elongation factor 1-beta	NA	-1.911	gene
104907510	probable sodium/metabolite cotransporter BASS1, chloroplastic	GO:0016021//integral component of membrane;GO:0009941//chloroplast envelope	NA	GO:0098717//pantothenate import across plasma membrane	K03453	NA	5.199	gene
104907508	mitogen-activated protein kinase 19	#N/A	GO:0005524//ATP binding;GO:0004707//MAP kinase activity	NA	K04371//mitogen-activated protein kinase 1/3 [EC:2.7.11.24]	NA	2.61	gene
104907507	ribokinase	GO:0005634//nucleus;GO:0005737//cytoplasm	GO:0046872//metal ion binding;GO:0005524//ATP binding;GO:0004747//ribokinase activity	GO:0019303//D-ribose catabolic process	K00852//ribokinase [EC:2.7.1.15]	NA	1.933	gene
104907506	trans-resveratrol di-O-methyltransferase-like	NA	GO:0008171//O-methyltransferase activity;GO:0046983//protein dimerization activity	GO:0032259//methylation	K16040	-1.63	-1.63	both
104907503	probable cytosolic iron-sulfur protein assembly protein CIAO1 homolog	GO:0097361//CIA complex	NA	GO:0016226//iron-sulfur cluster assembly	K16482//centriolar protein POC1	NA	-1.782	gene
104907496	fatty-acid-binding protein 3	GO:0009570//chloroplast stroma	GO:0016872//intramolecular lyase activity;GO:0005504//fatty acid binding	GO:0006631//fatty acid metabolic process	K01859	NA	2.223	gene
104907468	probable aspartyl aminopeptidase	#N/A	GO:0008237//metallopeptidase activity;GO:0004177//aminopeptidase activity;GO:0008270//zinc ion binding	NA	K01267//aspartyl aminopeptidase [EC:3.4.11.21]	NA	-6.139	gene
104907465	kelch domain-containing protein 3	GO:0000326//protein storage vacuole;GO:0005802//trans-Golgi network	NA	GO:0006886//intracellular protein transport	K14966//host cell factor;K20285//Rab9 effector protein with kelch motifs	NA	-2.627	gene
104907458	RING-H2 finger protein ATL74-like	GO:0016021//integral component of membrane	NA	NA	K19040;K19041//E3 ubiquitin-protein ligase RNF38/44 [EC:2.3.2.27]	NA	3.939	gene
104907423	exportin-7	GO:0005634//nucleus	GO:0008536//Ran GTPase binding	GO:0006886//intracellular protein transport	K18460//exportin-7	NA	20.801	gene
104907416	protoheme IX farnesyltransferase, mitochondrial	GO:0016021//integral component of membrane;GO:0031966//mitochondrial membrane	GO:0008495//protoheme IX farnesyltransferase activity	GO:0048034//heme O biosynthetic process	K02257//heme o synthase [EC:2.5.1.141]	NA	3.435	gene
104907412	pentatricopeptide repeat-containing protein At1g11290	#N/A	GO:0008270//zinc ion binding	NA	K22733//magnesium transporter	NA	1.592	gene
104907394	RING-H2 finger protein ATL11-like	GO:0016021//integral component of membrane	NA	NA	K10664	-1.437	NA	promoter
104907359	ubiquitin carboxyl-terminal hydrolase 25	NA	GO:0036459//thiol-dependent ubiquitinyl hydrolase activity	GO:0006511//ubiquitin-dependent protein catabolic process;GO:0016579//protein deubiquitination	K11855//ubiquitin carboxyl-terminal hydrolase 36/42 [EC:3.4.19.12]	NA	1.275	gene
104907358	probable sugar phosphate/phosphate translocator At3g14410	GO:0016021//integral component of membrane	NA	NA	K15280//solute carrier family 35, member C2	NA	5.93	gene
104907351	polyadenylate-binding protein-interacting protein 9-like	#N/A	GO:0003723//RNA binding	NA	K13126//polyadenylate-binding protein;K12831//splicing factor 3B subunit 4	NA	3.191	gene
104907337	C2 domain-containing protein At1g53590	GO:0016021//integral component of membrane	GO:0008289//lipid binding	GO:0006869//lipid transport	K12486//stromal membrane-associated protein;K03511//DNA polymerase kappa [EC:2.7.7.7];K01652//acetolactate synthase I/II/III large subunit [EC:2.2.1.6]	NA	-1.558	gene
104907335	60S ribosomal protein L18a-like protein	GO:0005840//ribosome;GO:0016021//integral component of membrane	NA	NA	K02882//large subunit ribosomal protein L18Ae	NA	4.717	gene
104907330	mitochondrial inner membrane protease subunit 1	GO:0016021//integral component of membrane	GO:0008236//serine-type peptidase activity	NA	K09647//mitochondrial inner membrane protease subunit 1 [EC:3.4.21.-]	NA	-1.744	gene
104907308	glucomannan 4-beta-mannosyltransferase 9-like	GO:0016021//integral component of membrane	GO:0016757//transferase activity, transferring glycosyl groups	NA	K13680//beta-mannan synthase [EC:2.4.1.32]	NA	-1.504	gene
104907293	probable carboxylesterase 11	#N/A	GO:0016787//hydrolase activity	NA	K14493//gibberellin receptor GID1 [EC:3.-.-.-]	NA	5.822	gene
104907291	ATP-dependent RNA helicase-like protein DB10	#N/A	GO:0005524//ATP binding;GO:0004386//helicase activity;GO:0003676//nucleic acid binding	NA	K12823//ATP-dependent RNA helicase DDX5/DBP2 [EC:3.6.4.13]	NA	3.571	gene
104907290	NAC domain-containing protein 2	GO:0005634//nucleus	GO:0003677//DNA binding	GO:0006355//regulation of transcription, DNA-templated	K03094//S-phase kinase-associated protein 1;K13126//polyadenylate-binding protein;K00521;K16296//serine carboxypeptidase-like clade I [EC:3.4.16.-]	NA	3.815	gene
104907285	vacuolar protein-sorting-associated protein 11 homolog	GO:0009705//plant-type vacuole membrane;GO:0030897//HOPS complex;GO:0031902//late endosome membrane;GO:0033263//CORVET complex	NA	GO:0006886//intracellular protein transport;GO:0016192//vesicle-mediated transport	K20179//vacuolar protein sorting-associated protein 11	NA	2.94	gene
104907271	pumilio homolog 5-like	NA	GO:0003723//RNA binding	NA	K17943//pumilio RNA-binding family	3.001	NA	promoter
104907258	subtilisin-like protease SBT5.4	#N/A	GO:0004252//serine-type endopeptidase activity	NA	K12619//5'-3' exoribonuclease 2 [EC:3.1.13.-];K13199//plasminogen activator inhibitor 1 RNA-binding protein;K15333//tRNA guanosine-2'-O-methyltransferase [EC:2.1.1.34];K14568//rRNA small subunit pseudouridine methyltransferase Nep1 [EC:2.1.1.260]	NA	1.056	gene
104907241	WPP domain-interacting tail-anchored protein 1-like	GO:0005635//nuclear envelope;GO:0016021//integral component of membrane	NA	NA	K20283//golgin subfamily A member 4	NA	1.295	gene
104907235	double-strand break repair protein MRE11	GO:0030870//Mre11 complex	GO:0008408//3'-5' exonuclease activity;GO:0005525//GTP binding;GO:0004519//endonuclease activity;GO:0030145//manganese ion binding	GO:0006302//double-strand break repair;GO:0051321//meiotic cell cycle	K10865//double-strand break repair protein MRE11	NA	-2.728	gene
104907227	cytochrome c-type biogenesis ccda-like chloroplastic protein	GO:0016021//integral component of membrane;GO:0009534//chloroplast thylakoid	NA	GO:0017004//cytochrome complex assembly;GO:0055114//oxidation-reduction process;GO:0045454//cell redox homeostasis	K06196	NA	-1.07	gene
104907225	probable ADP-ribosylation factor GTPase-activating protein AGD5	#N/A	GO:0046872//metal ion binding;GO:0005096//GTPase activator activity	NA	K12486//stromal membrane-associated protein	NA	3.445	gene
104907203	ATP-dependent RNA helicase-like protein DB10	#N/A	GO:0005524//ATP binding;GO:0004386//helicase activity;GO:0003676//nucleic acid binding	NA	K12823//ATP-dependent RNA helicase DDX5/DBP2 [EC:3.6.4.13]	NA	5.728	gene
104907196	mitochondrial acidic protein MAM33	GO:0005759//mitochondrial matrix	NA	NA	K15414//complement component 1 Q subcomponent-binding protein, mitochondrial	NA	-1.869	gene
104907191	ABC transporter I family member 6, chloroplastic	#N/A	GO:0005524//ATP binding;GO:0016887//ATPase activity	NA	K09013	-1.164	4.08	both
104907190	probable very-long-chain enoyl-CoA reductase art-1	GO:0016021//integral component of membrane	GO:0016627//oxidoreductase activity, acting on the CH-CH group of donors	GO:0006629//lipid metabolic process	K10258//very-long-chain enoyl-CoA reductase [EC:1.3.1.93]	NA	-1.107	gene
104907180	ATP-dependent RNA helicase DHX36	#N/A	GO:0005524//ATP binding;GO:0004386//helicase activity;GO:0003676//nucleic acid binding	NA	K14442//ATP-dependent RNA helicase DHX36 [EC:3.6.4.13]	NA	3.501	gene
104907178	mediator of RNA polymerase II transcription subunit 11	GO:0016592//mediator complex	GO:0003712//transcription coregulator activity	GO:0006357//regulation of transcription by RNA polymerase II	K15131//mediator of RNA polymerase II transcription subunit 11	NA	3.874	gene
104907163	kynurenine 3-monooxygenase-like	GO:0016021//integral component of membrane	GO:0071949//FAD binding	NA	K09838	NA	-1.732	gene
104907154	organic cation/carnitine transporter 4-like	GO:0016021//integral component of membrane	GO:0022857//transmembrane transporter activity	NA	K08202//MFS transporter, OCT family, solute carrier family 22 (organic cation transporter), member 4/5	NA	1.624	gene
104907136	GDSL esterase/lipase 7-like	#N/A	GO:0016298//lipase activity;GO:0016788//hydrolase activity, acting on ester bonds	GO:0006629//lipid metabolic process	K10691//E3 ubiquitin-protein ligase UBR4 [EC:2.3.2.27];K14209//solute carrier family 36 (proton-coupled amino acid transporter);K01188//beta-glucosidase [EC:3.2.1.21];K00679;K01206//alpha-L-fucosidase [EC:3.2.1.51]	NA	2.744	gene
104907127	GDSL esterase/lipase 7	#N/A	GO:0016788//hydrolase activity, acting on ester bonds	NA	K10691//E3 ubiquitin-protein ligase UBR4 [EC:2.3.2.27];K14209//solute carrier family 36 (proton-coupled amino acid transporter);K01188//beta-glucosidase [EC:3.2.1.21];K00679;K01206//alpha-L-fucosidase [EC:3.2.1.51]	NA	1.029	gene
104907118	NAD(P)H dehydrogenase (quinone) FQR1	NA	GO:0010181//FMN binding;GO:0003955//NAD(P)H dehydrogenase (quinone) activity	NA	K03809	NA	-1.528	gene
104907117	transcription factor bHLH123	#N/A	GO:0046983//protein dimerization activity	NA	K20641//Rho GTPase-activating protein 20	-1.601	NA	promoter
104907115	bifunctional fucokinase/fucose pyrophosphorylase	#N/A	GO:0005524//ATP binding;GO:0016772//transferase activity, transferring phosphorus-containing groups	NA	K05305//fucokinase [EC:2.7.1.52]	-2.253	NA	promoter
104907110	receptor-like protein 12	GO:0016021//integral component of membrane	NA	NA	K19613//leucine-rich repeat protein SHOC2	NA	-7.788	gene
104907108	mRNA cap guanine-N7 methyltransferase 1	GO:0042025//host cell nucleus;GO:0005634//nucleus	GO:0003723//RNA binding;GO:0004482//mRNA (guanine-N7-)-methyltransferase activity	NA	K00565//mRNA (guanine-N7-)-methyltransferase [EC:2.1.1.56]	NA	1.152	gene
104907107	putative beta-glucosidase 41	#N/A	GO:0004553//hydrolase activity, hydrolyzing O-glycosyl compounds	GO:0005975//carbohydrate metabolic process	K01188//beta-glucosidase [EC:3.2.1.21]	-2.361	NA	promoter
104907104	glycine-rich RNA-binding protein 4, mitochondrial	NA	GO:0003723//RNA binding	NA	K13195//cold-inducible RNA-binding protein;K12885//heterogeneous nuclear ribonucleoprotein G	NA	2.655	gene
104907099	cytochrome P450 CYP736A12-like	#N/A	GO:0020037//heme binding;GO:0005506//iron ion binding;GO:0016711//flavonoid 3'-monooxygenase activity	NA	K20562	-2.468	0.124	both
104907098	50S ribosomal protein L24, chloroplastic	GO:0005840//ribosome;GO:0009507//chloroplast	GO:0003735//structural constituent of ribosome;GO:0019843//rRNA binding	GO:0006412//translation	K02895//large subunit ribosomal protein L24	NA	1.188	gene
104907096	histone H2A.6	GO:0005634//nucleus;GO:0000790//nuclear chromatin;GO:0000786//nucleosome	GO:0003677//DNA binding;GO:0046982//protein heterodimerization activity	GO:0006342//chromatin silencing;GO:0006325//chromatin organization	K11251//histone H2A	1.52	NA	promoter
104907091	kinesin-3	GO:0005874//microtubule	GO:0005524//ATP binding;GO:0003777//microtubule motor activity;GO:0008017//microtubule binding	GO:0007018//microtubule-based movement	K10405//kinesin family member C1	NA	-1.502	gene
104907082	serine/threonine-protein phosphatase 6 regulatory ankyrin repeat subunit A-like	GO:0016021//integral component of membrane	NA	NA	K15503//serine/threonine-protein phosphatase 6 regulatory ankyrin repeat subunit B;K15502//serine/threonine-protein phosphatase 6 regulatory ankyrin repeat subunit A	NA	-21.25	gene
104907061	protein disulfide isomerase-like 5-4	GO:0016021//integral component of membrane	NA	GO:0045454//cell redox homeostasis	K20367//endoplasmic reticulum-Golgi intermediate compartment protein 3;K20365//endoplasmic reticulum-Golgi intermediate compartment protein 1	NA	3.229	gene
104907036	60S ribosomal protein L7a-2	GO:1990904//ribonucleoprotein complex	NA	GO:0042254//ribosome biogenesis	K02936//large subunit ribosomal protein L7Ae	2.794	NA	promoter
104906982	protein disulfide isomerase-like 1-3	GO:0005774//vacuolar membrane;GO:0005783//endoplasmic reticulum;GO:0005829//cytosol	GO:0003756//protein disulfide isomerase activity	GO:0034976//response to endoplasmic reticulum stress;GO:0045454//cell redox homeostasis	K09580//protein disulfide-isomerase A1 [EC:5.3.4.1]	NA	1.103	gene
104906976	auxin-responsive protein IAA4	GO:0005634//nucleus	NA	GO:0006355//regulation of transcription, DNA-templated;GO:0009734//auxin-activated signaling pathway	K14484//auxin-responsive protein IAA	NA	2.365	gene
104906952	transmembrane protein 120 homolog	GO:0016021//integral component of membrane	NA	NA	NA	-1.504	NA	promoter
104906947	putative pre-mRNA-splicing factor ATP-dependent RNA helicase DHX16	#N/A	GO:0005524//ATP binding;GO:0004386//helicase activity	NA	K12813//pre-mRNA-splicing factor ATP-dependent RNA helicase DHX16 [EC:3.6.4.13]	NA	-5.698	gene
104906937	PI-PLC X domain-containing protein At5g67130-like	#N/A	GO:0008081//phosphoric diester hydrolase activity	GO:0006629//lipid metabolic process	NA	NA	-1.698	gene
104906935	5'-nucleotidase domain-containing protein 4	#N/A	GO:0046872//metal ion binding	NA	K11339//mortality factor 4-like protein 1;K14175;K01081//5'-nucleotidase [EC:3.1.3.5]	NA	3.304	gene
104906933	SWI/SNF-related matrix-associated actin-dependent regulator of chromatin subfamily A-like protein 1	#N/A	GO:0036310//annealing helicase activity;GO:0005524//ATP binding	GO:0006281//DNA repair;GO:0031297//replication fork processing	K14440//SWI/SNF-related matrix-associated actin-dependent regulator of chromatin subfamily A-like protein 1 [EC:3.6.4.12]	NA	-3.406	gene
104906932	cyprosin-like	NA	GO:0004190//aspartic-type endopeptidase activity	GO:0006629//lipid metabolic process	K08245//phytepsin [EC:3.4.23.40]	NA	1.806	gene
104906929	signal recognition particle 19 kDa protein	GO:0048500//signal recognition particle	GO:0008312//7S RNA binding	GO:0006614//SRP-dependent cotranslational protein targeting to membrane	K03105//signal recognition particle subunit SRP19	NA	3.391	gene
104906911	MLO-like protein 1	GO:0016021//integral component of membrane	GO:0005516//calmodulin binding	GO:0006952//defense response;GO:0009607//response to biotic stimulus	K08472//mlo protein	NA	18.919	gene
104906907	protein COBRA	GO:0016021//integral component of membrane;GO:0046658//anchored component of plasma membrane	NA	GO:0052324//plant-type cell wall cellulose biosynthetic process;GO:0009664//plant-type cell wall organization;GO:0010215//cellulose microfibril organization;GO:0009832//plant-type cell wall biogenesis	NA	NA	2.022	gene
104906877	signal peptidase complex subunit 3B-like	GO:0016021//integral component of membrane;GO:0005787//signal peptidase complex	GO:0008233//peptidase activity	GO:0045047//protein targeting to ER;GO:0006465//signal peptide processing	K12948//signal peptidase complex subunit 3 [EC:3.4.-.-]	NA	2.773	gene
104906842	carboxyl-terminal-processing peptidase 2, chloroplastic	#N/A	GO:0008236//serine-type peptidase activity	NA	K03797	NA	20.428	gene
104906840	DEAD-box ATP-dependent RNA helicase 13	#N/A	GO:0005524//ATP binding;GO:0004386//helicase activity;GO:0003676//nucleic acid binding	NA	K14805//ATP-dependent RNA helicase DDX24/MAK5 [EC:3.6.4.13]	NA	1.125	gene
104906838	GDP-L-galactose phosphorylase 2-like	NA	GO:0080048//GDP-D-glucose phosphorylase activity	NA	K14190//GDP-L-galactose phosphorylase [EC:2.7.7.69]	1.541	NA	promoter
104906832	glutathione reductase, chloroplastic	GO:0009507//chloroplast	GO:0050661//NADP binding;GO:0050660//flavin adenine dinucleotide binding;GO:0004362//glutathione-disulfide reductase activity	GO:0006749//glutathione metabolic process;GO:0045454//cell redox homeostasis	K00383//glutathione reductase (NADPH) [EC:1.8.1.7]	NA	-2.964	gene
104906805	DUF21 domain-containing protein At4g14240-like	GO:0016021//integral component of membrane	NA	NA	K16302//metal transporter CNNM	NA	2.16	gene
104906802	UPF0613 protein PB24D3.06c	#N/A	GO:0016787//hydrolase activity	NA	NA	NA	2.767	gene
104906800	probable pectate lyase 18	#N/A	GO:0046872//metal ion binding;GO:0030570//pectate lyase activity	GO:0045490//pectin catabolic process	K01728//pectate lyase [EC:4.2.2.2]	NA	1.016	gene
104906793	transmembrane protein 64	GO:0016021//integral component of membrane	NA	NA	K14638//solute carrier family 15 (peptide/histidine transporter), member 3/4	NA	-1.406	gene
104906788	light-mediated development protein DET1	#N/A	GO:0003824//catalytic activity	NA	K10571//de-etiolated-1	NA	1.461	gene
104906785	transcription factor MUTE	#N/A	GO:0046983//protein dimerization activity	NA	K20558	-20.782	NA	promoter
104906767	probable aquaporin NIP-type	GO:0016021//integral component of membrane	GO:0015267//channel activity	NA	K09874	NA	3.482	gene
104906743	DEAD-box ATP-dependent RNA helicase 35	NA	GO:0005524//ATP binding;GO:0008270//zinc ion binding;GO:0003676//nucleic acid binding	NA	K13116//ATP-dependent RNA helicase DDX41 [EC:3.6.4.13]	NA	2.056	gene
104906742	protease Do-like 7	#N/A	GO:0004252//serine-type endopeptidase activity	NA	K22686	NA	-3.887	gene
104906735	DEAD-box ATP-dependent RNA helicase 37-like	GO:0005634//nucleus;GO:0043186//P granule	GO:0003723//RNA binding;GO:0005524//ATP binding;GO:0003724//RNA helicase activity;GO:0004386//helicase activity;GO:0003676//nucleic acid binding	NA	K11594//ATP-dependent RNA helicase DDX3X [EC:3.6.4.13]	NA	1.14	gene
104906729	splicing factor 3B subunit 3	GO:0005634//nucleus	GO:0003676//nucleic acid binding	NA	K12830//splicing factor 3B subunit 3	NA	3.565	gene
104906725	homogentisate solanesyltransferase, chloroplastic	GO:0016021//integral component of membrane	GO:0016765//transferase activity, transferring alkyl or aryl (other than methyl) groups	NA	K12501	NA	-1.308	gene
104906720	tubulin alpha-3 chain-like	GO:0005874//microtubule;GO:0005737//cytoplasm	GO:0005200//structural constituent of cytoskeleton;GO:0005525//GTP binding;GO:0003924//GTPase activity	GO:0007017//microtubule-based process	K07374//tubulin alpha	1.373	1.373	both
104906719	probable alpha-mannosidase I MNS4	GO:0016020//membrane	GO:0004571//mannosyl-oligosaccharide 1,2-alpha-mannosidase activity;GO:0005509//calcium ion binding	GO:0008152//metabolic process	K10085//ER degradation enhancer, mannosidase alpha-like 2	NA	6.642	gene
104906717	superoxide dismutase [Cu-Zn] 2	NA	GO:0004784//superoxide dismutase activity;GO:0046872//metal ion binding	NA	K04565//superoxide dismutase, Cu-Zn family [EC:1.15.1.1]	NA	1.205	gene
104906715	eukaryotic translation initiation factor NCBP	GO:0005737//cytoplasm	GO:0003743//translation initiation factor activity	NA	K03259//translation initiation factor 4E	NA	2.765	gene
104906687	1,2-dihydroxy-3-keto-5-methylthiopentene dioxygenase 2-like	GO:0005634//nucleus;GO:0005737//cytoplasm	GO:0010309//acireductone dioxygenase [iron(II)-requiring] activity;GO:0005506//iron ion binding	GO:0019509//L-methionine salvage from methylthioadenosine	K08967//1,2-dihydroxy-3-keto-5-methylthiopentene dioxygenase [EC:1.13.11.53 1.13.11.54]	NA	-1.297	gene
104906682	zinc finger CCCH domain-containing protein 49-like	#N/A	GO:0003723//RNA binding;GO:0046872//metal ion binding	NA	K12872//pre-mRNA-splicing factor RBM22/SLT11	NA	2.391	gene
104906672	parafibromin	GO:0016593//Cdc73/Paf1 complex	NA	GO:0006368//transcription elongation from RNA polymerase II promoter;GO:0016570//histone modification	K15175//parafibromin	NA	-1.166	gene
104906669	phosphatidylinositol-3-phosphatase myotubularin-1	#N/A	GO:0004725//protein tyrosine phosphatase activity	NA	K18081//myotubularin-related protein 1/2 [EC:3.1.3.64 3.1.3.95]	NA	3.298	gene
104906666	zinc finger CCCH domain-containing protein 20	NA	GO:0046872//metal ion binding	NA	K23047//E3 ubiquitin-protein ligase UNKL [EC:2.3.2.27];K23048//RING finger protein unkempt	3.884	NA	promoter
104906657	zinc finger protein 3	#N/A	GO:0003676//nucleic acid binding	NA	NA	-1.111	NA	promoter
104906621	aldo-keto reductase family 4 member C9	#N/A	GO:0016491//oxidoreductase activity	NA	K00002//alcohol dehydrogenase (NADP+) [EC:1.1.1.2];K22374	NA	1.082	gene
104906615	putative glycerol-3-phosphate transporter 1	GO:0016021//integral component of membrane	GO:0022857//transmembrane transporter activity	NA	K13783//MFS transporter, OPA family, solute carrier family 37 (glycerol-3-phosphate transporter), member 1/2	-1.855	NA	promoter
104906612	E3 ubiquitin protein ligase RIN2-like	GO:0016021//integral component of membrane	NA	NA	K10636//autocrine motility factor receptor [EC:2.3.2.27]	NA	3.874	gene
104906596	cleavage and polyadenylation specificity factor subunit 1	GO:0005634//nucleus;GO:0005829//cytosol	GO:0003676//nucleic acid binding	NA	K14401//cleavage and polyadenylation specificity factor subunit 1	NA	-5.185	gene
104906589	UPF0051 protein ABCI8, chloroplastic-like	#N/A	NA	GO:0016226//iron-sulfur cluster assembly	K09015;K07033	NA	2.744	gene
104906581	alpha-L-fucosidase 1-like	#N/A	GO:0004560//alpha-L-fucosidase activity	GO:0005975//carbohydrate metabolic process	K01206//alpha-L-fucosidase [EC:3.2.1.51]	-2.124	NA	promoter
104906580	3-ketoacyl-CoA synthase 5-like	GO:0016020//membrane	GO:0016747//transferase activity, transferring acyl groups other than amino-acyl groups	GO:0006633//fatty acid biosynthetic process	K15397//3-ketoacyl-CoA synthase [EC:2.3.1.199]	NA	1.177	gene
104906579	subtilisin-like protease	GO:0016021//integral component of membrane	GO:0004252//serine-type endopeptidase activity	NA	K12619//5'-3' exoribonuclease 2 [EC:3.1.13.-];K13199//plasminogen activator inhibitor 1 RNA-binding protein;K15333//tRNA guanosine-2'-O-methyltransferase [EC:2.1.1.34];K14568//rRNA small subunit pseudouridine methyltransferase Nep1 [EC:2.1.1.260]	-1.115	NA	promoter
104906533	dynein light chain 1, cytoplasmic-like	GO:0005874//microtubule;GO:0030286//dynein complex;GO:0005737//cytoplasm	GO:0003774//motor activity	GO:0007017//microtubule-based process	K10418//dynein light chain LC8-type	NA	1.965	gene
104906532	peroxisomal fatty acid beta-oxidation multifunctional protein MFP2	#N/A	GO:0003857//3-hydroxyacyl-CoA dehydrogenase activity	GO:0006631//fatty acid metabolic process	K10527//enoyl-CoA hydratase/3-hydroxyacyl-CoA dehydrogenase [EC:4.2.1.17 1.1.1.35 1.1.1.211]	NA	-2.027	gene
104906529	probable splicing factor 3B subunit 3	GO:0005634//nucleus	GO:0003676//nucleic acid binding	NA	K12830//splicing factor 3B subunit 3	0.516	1.577	both
104906515	ras-related protein RABA3	#N/A	GO:0005525//GTP binding;GO:0003924//GTPase activity	NA	K07904//Ras-related protein Rab-11A	NA	-1.172	gene
104906512	origin recognition complex subunit 2	GO:0000808//origin recognition complex;GO:0005634//nucleus	NA	GO:0006260//DNA replication	K02604//origin recognition complex subunit 2	1.988	NA	promoter
104906511	methyltransferase-like protein 10	GO:0005737//cytoplasm	GO:0016279//protein-lysine N-methyltransferase activity	NA	K22856//EEF1A lysine methyltransferase 2 [EC:2.1.1.-]	3.158	NA	promoter
104906488	rho GDP-dissociation inhibitor 1	GO:0005737//cytoplasm	GO:0005094//Rho GDP-dissociation inhibitor activity	NA	K12462//Rho GDP-dissociation inhibitor	NA	1.309	gene
104906461	ankyrin-3-like	GO:0016021//integral component of membrane	NA	NA	K15503//serine/threonine-protein phosphatase 6 regulatory ankyrin repeat subunit B;K15502//serine/threonine-protein phosphatase 6 regulatory ankyrin repeat subunit A	NA	-1.633	gene
104906458	ABC transporter B family member 28	GO:0016021//integral component of membrane	GO:0005524//ATP binding;GO:0042626//ATPase-coupled transmembrane transporter activity;GO:0016887//ATPase activity	NA	K05657//ATP-binding cassette, subfamily B (MDR/TAP), member 10	NA	5.141	gene
104906455	potassium channel KAT3-like	GO:0016021//integral component of membrane	GO:0005249//voltage-gated potassium channel activity	NA	K21867//potassium channel	NA	-2.662	gene
104906454	dehydration-responsive element-binding protein 1D-like	GO:0005634//nucleus	GO:0003677//DNA binding;GO:0003700//DNA-binding transcription factor activity	NA	K09286//EREBP-like factor	-5.004	NA	promoter
104906442	probable E3 ubiquitin-protein ligase ARI8	#N/A	GO:0046872//metal ion binding;GO:0004842//ubiquitin-protein transferase activity	NA	K11968//ariadne-1 [EC:2.3.2.31]	NA	-1.465	gene
104906436	probable methyltransferase PMT15	GO:0016021//integral component of membrane	GO:0008168//methyltransferase activity	GO:0032259//methylation	K12175//COP9 signalosome complex subunit 1;K15449//tRNA wybutosine-synthesizing protein 1 [EC:4.1.3.44]	NA	-2.3	gene
104906418	sorbitol dehydrogenase	NA	GO:0008270//zinc ion binding;GO:0016491//oxidoreductase activity	NA	K00008//L-iditol 2-dehydrogenase [EC:1.1.1.14]	NA	2.992	gene
104906389	kirola-like	NA	NA	GO:0006952//defense response	NA	NA	2.262	gene
104906387	kirola-like	#N/A	NA	GO:0006952//defense response	NA	2.199	2.199	both
104906363	succinate-semialdehyde dehydrogenase, mitochondrial	GO:0005739//mitochondrion	GO:0004777//succinate-semialdehyde dehydrogenase (NAD+) activity	GO:0009450//gamma-aminobutyric acid catabolic process	K17761//succinate-semialdehyde dehydrogenase, mitochondrial [EC:1.2.1.24]	NA	2.91	gene
104906355	mRNA-decapping enzyme subunit 2	#N/A	GO:0003723//RNA binding;GO:0016787//hydrolase activity;GO:0030145//manganese ion binding	NA	K12613//mRNA-decapping enzyme subunit 2 [EC:3.6.1.62]	NA	1.606	gene
104906354	probable mitochondrial-processing peptidase subunit beta	#N/A	GO:0046872//metal ion binding;GO:0004222//metalloendopeptidase activity	NA	K17732//mitochondrial-processing peptidase subunit beta [EC:3.4.24.64]	NA	2.71	gene
104906346	nicastrin	GO:0016021//integral component of membrane	NA	GO:0016485//protein processing	K06171//nicastrin	NA	1.103	gene
104906325	crossover junction endonuclease MUS81-like	#N/A	GO:0003677//DNA binding;GO:0004518//nuclease activity	NA	K08991//crossover junction endonuclease MUS81 [EC:3.1.22.-]	NA	5.999	gene
104906301	probable serine/threonine-protein kinase At1g18390	GO:0016021//integral component of membrane	GO:0005524//ATP binding;GO:0004672//protein kinase activity	NA	K04733//interleukin-1 receptor-associated kinase 4 [EC:2.7.11.1]	NA	3.306	gene
104906295	aldose 1-epimerase	#N/A	GO:0030246//carbohydrate binding;GO:0004034//aldose 1-epimerase activity	GO:0019318//hexose metabolic process	K01785//aldose 1-epimerase [EC:5.1.3.3]	NA	3.169	gene
104906283	ATP-dependent zinc metalloprotease FTSH 12, chloroplastic	GO:0062091//Ycf2/FtsHi complex;GO:0005739//mitochondrion;GO:0009706//chloroplast inner membrane	GO:0004222//metalloendopeptidase activity;GO:0005524//ATP binding;GO:0016464//chloroplast protein-transporting ATPase activity	GO:0045037//protein import into chloroplast stroma	K03798	NA	1.862	gene
104906271	NADH dehydrogenase [ubiquinone] iron-sulfur protein 1, mitochondrial	GO:0016020//membrane	GO:0009055//electron transfer activity;GO:0051539//4 iron, 4 sulfur cluster binding;GO:0008137//NADH dehydrogenase (ubiquinone) activity;GO:0051536//iron-sulfur cluster binding	GO:0042773//ATP synthesis coupled electron transport	K03934//NADH dehydrogenase (ubiquinone) Fe-S protein 1 [EC:7.1.1.2 1.6.99.3]	NA	2.558	gene
104906269	potassium channel SKOR	GO:0016021//integral component of membrane	GO:0005249//voltage-gated potassium channel activity	GO:0034765//regulation of ion transmembrane transport	K21867//potassium channel	NA	3.316	gene
104906256	delta(7)-sterol-C5(6)-desaturase-like	GO:0016021//integral component of membrane	GO:0005506//iron ion binding;GO:0016491//oxidoreductase activity	GO:0008610//lipid biosynthetic process	K00227//Delta7-sterol 5-desaturase [EC:1.14.19.20]	NA	-18.54	gene
104906253	protoporphyrinogen oxidase, chloroplastic/mitochondrial	GO:0005743//mitochondrial inner membrane;GO:0009706//chloroplast inner membrane	GO:0004729//oxygen-dependent protoporphyrinogen oxidase activity	GO:0006782//protoporphyrinogen IX biosynthetic process;GO:0006783//heme biosynthetic process;GO:0015995//chlorophyll biosynthetic process	K00231//protoporphyrinogen/coproporphyrinogen III oxidase [EC:1.3.3.4 1.3.3.15]	NA	3.672	gene
104906234	plastidic glucose transporter 4	GO:0016021//integral component of membrane	GO:0022857//transmembrane transporter activity	NA	K08150//MFS transporter, SP family, solute carrier family 2 (myo-inositol transporter), member 13	NA	1.302	gene
104906226	KH domain-containing protein At4g18375	#N/A	GO:0003723//RNA binding	NA	K21444//poly(rC)-binding protein 3/4	NA	5.227	gene
104906224	polypyrimidine tract-binding protein homolog 1	#N/A	GO:0003723//RNA binding	NA	K14948//polypyrimidine tract-binding protein 2	-2.236	NA	promoter
104906212	multiple RNA-binding domain-containing protein 1	#N/A	GO:0003723//RNA binding	NA	K14787//multiple RNA-binding domain-containing protein 1	NA	4.52	gene
104906202	ATP-dependent 6-phosphofructokinase 5, chloroplastic-like	GO:0005737//cytoplasm	GO:0046872//metal ion binding;GO:0003872//6-phosphofructokinase activity;GO:0005524//ATP binding	GO:0006002//fructose 6-phosphate metabolic process	K00850//6-phosphofructokinase 1 [EC:2.7.1.11]	NA	-2.771	gene
104906192	eukaryotic translation initiation factor 2 subunit gamma-like	#N/A	GO:0005525//GTP binding;GO:0003924//GTPase activity	NA	K03242//translation initiation factor 2 subunit 3	NA	3.716	gene
104906176	ribosome biogenesis protein WDR12 homolog	GO:0070545//PeBoW complex;GO:0005654//nucleoplasm;GO:0009506//plasmodesma;GO:0005730//nucleolus;GO:0030687//preribosome, large subunit precursor	GO:0043021//ribonucleoprotein complex binding	GO:0000470//maturation of LSU-rRNA;GO:0000460//maturation of 5.8S rRNA;GO:0000466//maturation of 5.8S rRNA from tricistronic rRNA transcript (SSU-rRNA, 5.8S rRNA, LSU-rRNA);GO:0000463//maturation of LSU-rRNA from tricistronic rRNA transcript (SSU-rRNA, 5.8S rRNA, LSU-rRNA)	K14863//ribosome biogenesis protein YTM1	NA	-1.771	gene
104906175	BRCA1-associated protein	GO:0000151//ubiquitin ligase complex	GO:0008270//zinc ion binding;GO:0004842//ubiquitin-protein transferase activity;GO:0003676//nucleic acid binding	GO:0010029//regulation of seed germination	K10632//BRCA1-associated protein [EC:2.3.2.27]	NA	2.087	gene
104906174	origin recognition complex subunit 3	GO:0005664//nuclear origin of replication recognition complex	GO:0003677//DNA binding	GO:0006260//DNA replication	K02605//origin recognition complex subunit 3	NA	-1.074	gene
104906167	nipped-B-like protein	GO:0005634//nucleus	GO:0046872//metal ion binding;GO:0003682//chromatin binding	GO:0051177//meiotic sister chromatid cohesion;GO:0034508//centromere complex assembly;GO:0010468//regulation of gene expression;GO:0007049//cell cycle;GO:0009793//embryo development ending in seed dormancy	K06672//cohesin loading factor subunit SCC2	1.308	NA	promoter
104906153	transcription factor JUNGBRUNNEN 1-like	GO:0005634//nucleus	GO:0003677//DNA binding	GO:0006355//regulation of transcription, DNA-templated	K13126//polyadenylate-binding protein;K03094//S-phase kinase-associated protein 1;K00521	NA	19.552	gene
104906140	KRR1 small subunit processome component homolog	GO:0005730//nucleolus	GO:0003723//RNA binding	GO:0006364//rRNA processing	K06961//ribosomal RNA assembly protein	NA	1.567	gene
104906136	pentatricopeptide repeat-containing protein At4g02750	#N/A	GO:0008270//zinc ion binding	NA	K06180;K22733//magnesium transporter	NA	4.473	gene
104906135	syntaxin-61	GO:0016021//integral component of membrane;GO:0005802//trans-Golgi network	GO:0005484//SNAP receptor activity	GO:0006886//intracellular protein transport;GO:0048193//Golgi vesicle transport	K08498//syntaxin 6	NA	2.498	gene
104906131	ubiquitin carboxyl-terminal hydrolase 6-like	#N/A	GO:0036459//thiol-dependent ubiquitinyl hydrolase activity	GO:0006511//ubiquitin-dependent protein catabolic process;GO:0016579//protein deubiquitination	K11843//ubiquitin carboxyl-terminal hydrolase 14 [EC:3.4.19.12]	NA	3.213	gene
104906117	glutathione S-transferase DHAR2-like	#N/A	GO:0045174//glutathione dehydrogenase (ascorbate) activity	GO:0033355//ascorbate glutathione cycle	K21888//glutathione dehydrogenase/transferase [EC:1.8.5.1 2.5.1.18]	NA	5.8	gene
104906088	dihydropyrimidine dehydrogenase [NADP(+)]	GO:0016021//integral component of membrane;GO:0005737//cytoplasm	GO:0016627//oxidoreductase activity, acting on the CH-CH group of donors;GO:0003723//RNA binding	GO:0006396//RNA processing	K00207//dihydropyrimidine dehydrogenase (NADP+) [EC:1.3.1.2]	NA	-4.59	gene
104906084	probable adenylate kinase 6, chloroplastic	#N/A	GO:0005524//ATP binding;GO:0004017//adenylate kinase activity	NA	K00939//adenylate kinase [EC:2.7.4.3]	NA	-1.889	gene
104906079	leukotriene A-4 hydrolase homolog	NA	GO:0008237//metallopeptidase activity;GO:0008270//zinc ion binding	NA	K01254//leukotriene-A4 hydrolase [EC:3.3.2.6]	NA	1.761	gene
104906077	sporulation protein RMD1	GO:0016021//integral component of membrane	NA	NA	NA	NA	3.704	gene
104906075	GDSL esterase/lipase At2g40250	#N/A	GO:0016788//hydrolase activity, acting on ester bonds	NA	K10691//E3 ubiquitin-protein ligase UBR4 [EC:2.3.2.27];K01188//beta-glucosidase [EC:3.2.1.21];K14209//solute carrier family 36 (proton-coupled amino acid transporter);K00679;K01206//alpha-L-fucosidase [EC:3.2.1.51]	NA	-2.961	gene
104906064	sorting and assembly machinery component 50 homolog	GO:0019867//outer membrane	NA	NA	K07277//outer membrane protein insertion porin family	2.892	NA	promoter
104906062	probable inactive serine/threonine-protein kinase bub1	NA	NA	GO:0007094//mitotic spindle assembly checkpoint	K02178//checkpoint serine/threonine-protein kinase [EC:2.7.11.1]	NA	-2.221	gene
104906046	glutamate receptor 2.7	GO:0016021//integral component of membrane	GO:0015276//ligand-gated ion channel activity	NA	K05387	NA	4.163	gene
104906045	glutamate receptor 2.7-like	GO:0016021//integral component of membrane	GO:0015276//ligand-gated ion channel activity	NA	K05387	NA	1.882	gene
104906044	bifunctional protein FolD 2	GO:0005829//cytosol	GO:0004488//methylenetetrahydrofolate dehydrogenase (NADP+) activity;GO:0004477//methenyltetrahydrofolate cyclohydrolase activity	GO:0006730//one-carbon metabolic process;GO:0035999//tetrahydrofolate interconversion	K00288//methylenetetrahydrofolate dehydrogenase (NADP+) / methenyltetrahydrofolate cyclohydrolase / formyltetrahydrofolate synthetase [EC:1.5.1.5 3.5.4.9 6.3.4.3]	NA	2.505	gene
104906043	4-hydroxy-tetrahydrodipicolinate reductase 2, chloroplastic-like	#N/A	GO:0070402//NADPH binding;GO:0008839//4-hydroxy-tetrahydrodipicolinate reductase	GO:0009089//lysine biosynthetic process via diaminopimelate	K00215	NA	2.334	gene
104906039	protein farnesyltransferase subunit beta	GO:0005965//protein farnesyltransferase complex	GO:0008270//zinc ion binding;GO:0004660//protein farnesyltransferase activity	GO:0018343//protein farnesylation	K05954//protein farnesyltransferase subunit beta [EC:2.5.1.58]	NA	-1.639	gene
104906033	probable voltage-gated potassium channel subunit beta	GO:0009506//plasmodesma;GO:0005886//plasma membrane	GO:0005524//ATP binding;GO:0004672//protein kinase activity	NA	K14521//N-acetyltransferase 10 [EC:2.3.1.-];K05275	NA	2.834	gene
104906030	polyadenylate-binding protein-interacting protein 7	NA	GO:0003729//mRNA binding	NA	K08740//DNA mismatch repair protein MSH4	NA	1.299	gene
104906027	BTB/POZ domain-containing protein At2g24240-like	NA	NA	GO:0051260//protein homooligomerization	K21754//BTB/POZ domain-containing protein KCTD1/15	NA	1.47	gene
104906026	fatty-acid-binding protein 2	GO:0009570//chloroplast stroma	GO:0016872//intramolecular lyase activity;GO:0005504//fatty acid binding	NA	NA	NA	-3.99	gene
104906014	probable cyclic nucleotide-gated ion channel 17	GO:0016021//integral component of membrane	GO:0005249//voltage-gated potassium channel activity;GO:0005216//ion channel activity	NA	K05391//cyclic nucleotide gated channel, plant	NA	3.564	gene
104906013	probable cyclic nucleotide-gated ion channel 14	GO:0016021//integral component of membrane	GO:0005216//ion channel activity	NA	K05391//cyclic nucleotide gated channel, plant	1.333	NA	promoter
104906008	glutamate receptor 2.2-like	GO:0016021//integral component of membrane	GO:0015276//ligand-gated ion channel activity	NA	K05387	4.099	NA	promoter
104906002	zinc finger protein CONSTANS-LIKE 4	GO:0005634//nucleus	GO:0008270//zinc ion binding	NA	K12135	NA	3.777	gene
104905997	histone deacetylase 9	GO:0005634//nucleus	GO:0046872//metal ion binding;GO:0032041//NAD-dependent histone deacetylase activity (H3-K14 specific)	NA	K06067//histone deacetylase 1/2 [EC:3.5.1.98]	NA	3.663	gene
104905995	probable inactive receptor-like protein kinase At1g65250	#N/A	GO:0005524//ATP binding;GO:0004672//protein kinase activity	NA	K04733//interleukin-1 receptor-associated kinase 4 [EC:2.7.11.1]	5.677	5.677	both
104905993	probable inactive receptor-like protein kinase At1g65250	#N/A	GO:0005524//ATP binding;GO:0004672//protein kinase activity	NA	K04733//interleukin-1 receptor-associated kinase 4 [EC:2.7.11.1]	NA	-1.148	gene
104905984	3-ketoacyl-CoA synthase 6-like	GO:0016021//integral component of membrane	GO:0016747//transferase activity, transferring acyl groups other than amino-acyl groups	GO:0006633//fatty acid biosynthetic process	K15397//3-ketoacyl-CoA synthase [EC:2.3.1.199]	NA	2.493	gene
104905977	dynamin-related protein 3A-like	NA	GO:0005525//GTP binding;GO:0003924//GTPase activity	NA	K17065//dynamin 1-like protein [EC:3.6.5.5]	19.133	0.654	both
104905975	zinc finger CCCH domain-containing protein 22	NA	GO:0046872//metal ion binding;GO:0003676//nucleic acid binding	NA	K17569//G patch domain-containing protein 2;K13103//tuftelin-interacting protein 11	NA	-1.942	gene
104905974	3-ketoacyl-CoA synthase 10	GO:0005783//endoplasmic reticulum;GO:0016021//integral component of membrane	GO:0016747//transferase activity, transferring acyl groups other than amino-acyl groups	GO:0080167//response to karrikin;GO:0009409//response to cold;GO:0009416//response to light stimulus;GO:0006633//fatty acid biosynthetic process	K15397//3-ketoacyl-CoA synthase [EC:2.3.1.199]	NA	-5.259	gene
104905968	conserved oligomeric Golgi complex subunit 7	GO:0017119//Golgi transport complex;GO:0005829//cytosol	NA	GO:0006886//intracellular protein transport;GO:0009826//unidimensional cell growth;GO:0045053//protein retention in Golgi apparatus;GO:0010016//shoot system morphogenesis;GO:0007030//Golgi organization;GO:0009933//meristem structural organization;GO:0009793//embryo development ending in seed dormancy	K20294//conserved oligomeric Golgi complex subunit 7	NA	1.817	gene
104905962	DEAD-box ATP-dependent RNA helicase 18-like	NA	GO:0003723//RNA binding;GO:0005524//ATP binding;GO:0003724//RNA helicase activity	NA	K14809//ATP-dependent RNA helicase DDX55/SPB4 [EC:3.6.4.13]	-19.081	0.38	both
104905955	dehydration-responsive element-binding protein 2C-like	GO:0005634//nucleus	GO:0003677//DNA binding;GO:0003700//DNA-binding transcription factor activity	NA	K09286//EREBP-like factor	NA	5.055	gene
104905953	laccase-12	GO:0048046//apoplast;GO:0005886//plasma membrane	GO:0052716//hydroquinone:oxygen oxidoreductase activity;GO:0004322//ferroxidase activity;GO:0005507//copper ion binding	GO:0046274//lignin catabolic process;GO:0055072//iron ion homeostasis;GO:0006826//iron ion transport	K05909//laccase [EC:1.10.3.2]	NA	-6.759	gene
104905949	presenilin-like protein At1g08700	GO:0016021//integral component of membrane;GO:0005798//Golgi-associated vesicle;GO:0005789//endoplasmic reticulum membrane;GO:0000139//Golgi membrane	GO:0004190//aspartic-type endopeptidase activity	GO:0016485//protein processing;GO:0007219//Notch signaling pathway	K04505//presenilin 1 [EC:3.4.23.-]	NA	2.811	gene
104905947	biotin carboxyl carrier protein of acetyl-CoA carboxylase 1, chloroplastic	GO:0009507//chloroplast	NA	GO:0045717//negative regulation of fatty acid biosynthetic process	K02160//acetyl-CoA carboxylase biotin carboxyl carrier protein	-4.629	0.074	both
104905941	staphylococcal-like nuclease CAN2	#N/A	GO:0046872//metal ion binding;GO:0003676//nucleic acid binding;GO:0004518//nuclease activity	NA	NA	NA	3.759	gene
104905939	copper transport protein ATX1	GO:0016021//integral component of membrane	NA	NA	K05287//phosphatidylinositol glycan, class F [EC:2.7.-.-]	NA	3.5	gene
104905930	putative disease resistance RPP13-like protein 2	NA	GO:0043531//ADP binding;GO:0005524//ATP binding	GO:0006952//defense response	K13457	NA	4.7	gene
104905914	petal death protein-like	NA	GO:0003824//catalytic activity	NA	K01637//isocitrate lyase [EC:4.1.3.1]	-1.08	NA	promoter
104905911	basic blue protein-like	NA	GO:0009055//electron transfer activity	NA	K04733//interleukin-1 receptor-associated kinase 4 [EC:2.7.11.1];K03006//DNA-directed RNA polymerase II subunit RPB1 [EC:2.7.7.6];K12125;K01426//amidase [EC:3.5.1.4]	1.629	NA	promoter
104905910	potassium-activated aldehyde dehydrogenase, mitochondrial-like	GO:0009507//chloroplast	GO:0016620//oxidoreductase activity, acting on the aldehyde or oxo group of donors, NAD or NADP as acceptor;GO:0008802//betaine-aldehyde dehydrogenase activity	GO:0019285//glycine betaine biosynthetic process from choline	K00130//betaine-aldehyde dehydrogenase [EC:1.2.1.8];K15015//solute carrier family 32 (vesicular inhibitory amino acid transporter)	-1.343	-1.343	both
104905908	basic blue protein-like	#N/A	GO:0009055//electron transfer activity	NA	K04733//interleukin-1 receptor-associated kinase 4 [EC:2.7.11.1];K12125;K01426//amidase [EC:3.5.1.4]	NA	2.266	gene
104905905	putative DEAD-box ATP-dependent RNA helicase 29	GO:0005730//nucleolus	GO:0003723//RNA binding;GO:0005524//ATP binding;GO:0003724//RNA helicase activity	GO:0006364//rRNA processing	K14808//ATP-dependent RNA helicase DDX54/DBP10 [EC:3.6.4.13]	NA	3.203	gene
104905890	DNA-directed RNA polymerase III subunit RPC2	NA	GO:0003899//DNA-directed 5'-3' RNA polymerase activity;GO:0032549//ribonucleoside binding;GO:0003677//DNA binding	GO:0009561//megagametogenesis;GO:0006351//transcription, DNA-templated	K03021//DNA-directed RNA polymerase III subunit RPC2 [EC:2.7.7.6]	NA	3.747	gene
104905867	pre-rRNA-processing protein TSR1 homolog	GO:0005634//nucleus	NA	GO:0042254//ribosome biogenesis	K14799//pre-rRNA-processing protein TSR1	NA	3.687	gene
104905852	BRI1 kinase inhibitor 1	GO:0005886//plasma membrane	GO:0019210//kinase inhibitor activity	NA	K14499	1.383	NA	promoter
104905845	bifunctional purine biosynthesis protein purH-like	#N/A	GO:0004643//phosphoribosylaminoimidazolecarboxamide formyltransferase activity;GO:0003937//IMP cyclohydrolase activity	GO:0006164//purine nucleotide biosynthetic process	K00602//phosphoribosylaminoimidazolecarboxamide formyltransferase / IMP cyclohydrolase [EC:2.1.2.3 3.5.4.10]	NA	-1.893	gene
104905779	auxin response factor 5	GO:0005634//nucleus	GO:0003677//DNA binding	GO:0006355//regulation of transcription, DNA-templated;GO:0009734//auxin-activated signaling pathway	K14486	-1.545	NA	promoter
104905776	NAC domain-containing protein 89-like	GO:0005634//nucleus;GO:0016021//integral component of membrane	GO:0003677//DNA binding	GO:0006355//regulation of transcription, DNA-templated	K13126//polyadenylate-binding protein;K00521	NA	-1.28	gene
104905760	DNA-directed RNA polymerase III subunit rpc1-like	NA	GO:0003899//DNA-directed 5'-3' RNA polymerase activity;GO:0003677//DNA binding	GO:0006351//transcription, DNA-templated	K03018//DNA-directed RNA polymerase III subunit RPC1 [EC:2.7.7.6]	-1.52	-1.52	both
104905748	probable alpha-amylase 2	NA	GO:0004556//alpha-amylase activity;GO:0008234//cysteine-type peptidase activity;GO:0005509//calcium ion binding;GO:0008168//methyltransferase activity;GO:0103025//alpha-amylase activity (releasing maltohexaose)	GO:0005975//carbohydrate metabolic process;GO:0032259//methylation	K01176//alpha-amylase [EC:3.2.1.1];K12741//heterogeneous nuclear ribonucleoprotein A1/A3;K13098//RNA-binding protein FUS;K15174//RNA polymerase II-associated factor 1;K02184//formin 2	NA	-1.609	gene
104905744	homeotic protein knotted-1	GO:0005634//nucleus	GO:0043565//sequence-specific DNA binding	GO:0006355//regulation of transcription, DNA-templated	K16670//homeobox protein Meis2;K15613//homeobox protein Meis1	NA	5.045	gene
104905734	inositol-tetrakisphosphate 1-kinase 2	GO:0005634//nucleus;GO:0005737//cytoplasm	GO:0000287//magnesium ion binding;GO:0052725//inositol-1,3,4-trisphosphate 6-kinase activity;GO:0005524//ATP binding;GO:0052726//inositol-1,3,4-trisphosphate 5-kinase activity;GO:0047325//inositol tetrakisphosphate 1-kinase activity	GO:0009611//response to wounding;GO:0032957//inositol trisphosphate metabolic process	K00913//inositol-1,3,4-trisphosphate 5/6-kinase / inositol-tetrakisphosphate 1-kinase [EC:2.7.1.159 2.7.1.134]	NA	-2.414	gene
104905730	U6 snRNA-associated Sm-like protein LSm8	GO:0005681//spliceosomal complex;GO:0005688//U6 snRNP;GO:0005829//cytosol;GO:0071011//precatalytic spliceosome;GO:0046540//U4/U6 x U5 tri-snRNP complex	GO:0003723//RNA binding	GO:0016070//RNA metabolic process;GO:0000398//mRNA splicing, via spliceosome	K12627//U6 snRNA-associated Sm-like protein LSm8	1.747	1.747	both
104905728	WAT1-related protein At3g02690, chloroplastic	GO:0016021//integral component of membrane;GO:0009507//chloroplast	NA	NA	NA	NA	1.418	gene
104905714	transcriptional corepressor SEUSS	GO:0005634//nucleus;GO:0005667//transcription regulator complex	GO:0001102//RNA polymerase II activating transcription factor binding	GO:0045892//negative regulation of transcription, DNA-templated;GO:0000122//negative regulation of transcription by RNA polymerase II;GO:0045944//positive regulation of transcription by RNA polymerase II;GO:0007275//multicellular organism development	K14972//PAX-interacting protein 1	NA	3.343	gene
104905712	probable LRR receptor-like serine/threonine-protein kinase At3g47570	GO:0016021//integral component of membrane	GO:0004674//protein serine/threonine kinase activity;GO:0005524//ATP binding	NA	K04730//interleukin-1 receptor-associated kinase 1 [EC:2.7.11.1]	NA	6.499	gene
104905711	small RNA degrading nuclease 5	#N/A	GO:0003676//nucleic acid binding	NA	K14570//RNA exonuclease 1 [EC:3.1.-.-]	NA	-1.288	gene
104905698	laccase-14-like	GO:0048046//apoplast	GO:0052716//hydroquinone:oxygen oxidoreductase activity;GO:0005507//copper ion binding	GO:0046274//lignin catabolic process	K05909//laccase [EC:1.10.3.2]	-0.366	3.51	both
104905695	indole-3-glycerol phosphate synthase, chloroplastic-like	#N/A	GO:0004425//indole-3-glycerol-phosphate synthase activity	GO:0006568//tryptophan metabolic process	K01609	NA	3.97	gene
104905689	transcription factor TGA3-like	NA	GO:0043565//sequence-specific DNA binding;GO:0003700//DNA-binding transcription factor activity	GO:0006351//transcription, DNA-templated	K14431//transcription factor TGA	NA	1.326	gene
104905688	aminotransferase ALD1	#N/A	GO:0008483//transaminase activity;GO:0030170//pyridoxal phosphate binding	GO:0009058//biosynthetic process	K10206//LL-diaminopimelate aminotransferase [EC:2.6.1.83]	NA	-1.634	gene
104905687	alkylated DNA repair protein alkB homolog 8	#N/A	GO:0016300//tRNA (uracil) methyltransferase activity	GO:0002098//tRNA wobble uridine modification	K10770//alkylated DNA repair protein alkB homolog 8 [EC:1.14.11.- 2.1.1.229]	1.637	NA	promoter
104905682	pre-mRNA-processing protein 40A	#N/A	NA	GO:0045292//mRNA cis splicing, via spliceosome	K12821//pre-mRNA-processing factor 40	NA	-3.086	gene
104905653	1,4-alpha-glucan-branching enzyme 1, chloroplastic/amyloplastic-like	NA	GO:0004553//hydrolase activity, hydrolyzing O-glycosyl compounds;GO:0043169//cation binding;GO:0003844//1,4-alpha-glucan branching enzyme activity	GO:0005978//glycogen biosynthetic process	K00700//1,4-alpha-glucan branching enzyme [EC:2.4.1.18]	NA	1.819	gene
104905643	Niemann-Pick C1 protein-like	GO:0016021//integral component of membrane	GO:0005319//lipid transporter activity	NA	K12385//Niemann-Pick C1 protein	NA	-1.372	gene
104905635	KRR1 small subunit processome component homolog	GO:0005730//nucleolus	GO:0003723//RNA binding	GO:0006364//rRNA processing	K06961//ribosomal RNA assembly protein	NA	-1.462	gene
104905595	transmembrane protein 115	GO:0005794//Golgi apparatus;GO:0016021//integral component of membrane	NA	GO:0006890//retrograde vesicle-mediated transport, Golgi to endoplasmic reticulum	NA	NA	2.09	gene
104905594	U11/U12 small nuclear ribonucleoprotein 25 kDa protein	GO:0005689//U12-type spliceosomal complex	NA	GO:0000398//mRNA splicing, via spliceosome	K13153//U11/U12 small nuclear ribonucleoprotein 25 kDa protein	NA	-2.569	gene
104905580	probable transmembrane ascorbate ferrireductase 2	GO:0016021//integral component of membrane	GO:0016491//oxidoreductase activity	NA	K08360//cytochrome b-561 [EC:7.2.1.3]	NA	5.472	gene
104905572	xyloglucan galactosyltransferase KATAMARI1-like	NA	GO:0016757//transferase activity, transferring glycosyl groups	GO:0006486//protein glycosylation	K20888//xyloglucan galactosyltransferase MUR3 [EC:2.4.1.-]	NA	-1.379	gene
104905525	long chain acyl-CoA synthetase 9, chloroplastic	#N/A	GO:0003824//catalytic activity	NA	K01897//long-chain acyl-CoA synthetase [EC:6.2.1.3]	NA	1.839	gene
104905521	cell division control protein 2 homolog	#N/A	GO:0008353//RNA polymerase II CTD heptapeptide repeat kinase activity;GO:0004693//cyclin-dependent protein serine/threonine kinase activity;GO:0004674//protein serine/threonine kinase activity;GO:0005524//ATP binding	GO:0051301//cell division;GO:0007049//cell cycle	K02206//cyclin-dependent kinase 2 [EC:2.7.11.22]	NA	1.826	gene
104905504	isoprenylcysteine alpha-carbonyl methylesterase ICME-like	GO:0016021//integral component of membrane	GO:0016787//hydrolase activity	NA	K15889//prenylcysteine alpha-carboxyl methylesterase [EC:3.1.1.-]	-1.928	NA	promoter
104905486	UDP-galactose/UDP-glucose transporter 2	GO:0016021//integral component of membrane	NA	GO:0055085//transmembrane transport	K15277//solute carrier family 35 (adenosine 3'-phospho 5'-phosphosulfate transporter), member B3	NA	-3.642	gene
104905469	lysophospholipid acyltransferase LPEAT2	GO:0016021//integral component of membrane	GO:0071618//lysophosphatidylethanolamine acyltransferase activity;GO:0016746//transferase activity, transferring acyl groups;GO:0005509//calcium ion binding;GO:0050200//plasmalogen synthase activity	GO:0000038//very long-chain fatty acid metabolic process;GO:0006644//phospholipid metabolic process	K13510//lysophosphatidylcholine acyltransferase / lyso-PAF acetyltransferase [EC:2.3.1.23 2.3.1.67]	NA	18.592	gene
104905467	uracil phosphoribosyltransferase	#N/A	GO:0004845//uracil phosphoribosyltransferase activity	GO:0006223//uracil salvage;GO:0009116//nucleoside metabolic process	K00761//uracil phosphoribosyltransferase [EC:2.4.2.9]	NA	-1.122	gene
104905466	truncated transcription factor CAULIFLOWER A	GO:0005634//nucleus	GO:0000977//RNA polymerase II transcription regulatory region sequence-specific DNA binding;GO:0003700//DNA-binding transcription factor activity;GO:0046983//protein dimerization activity	GO:0045944//positive regulation of transcription by RNA polymerase II	K09264//MADS-box transcription factor, plant	NA	-2.276	gene
104905454	SH3 domain-containing protein C23A1.17-like	GO:0042025//host cell nucleus;GO:0000786//nucleosome	GO:0003677//DNA binding	GO:0006334//nucleosome assembly	K11275//histone H1/5	NA	1.954	gene
104905445	geraniol 8-hydroxylase-like	#N/A	GO:0016705//oxidoreductase activity, acting on paired donors, with incorporation or reduction of molecular oxygen;GO:0020037//heme binding;GO:0005506//iron ion binding;GO:0004497//monooxygenase activity	NA	K20556	NA	-2.734	gene
104905444	geraniol 8-hydroxylase-like	#N/A	GO:0016705//oxidoreductase activity, acting on paired donors, with incorporation or reduction of molecular oxygen;GO:0020037//heme binding;GO:0005506//iron ion binding;GO:0004497//monooxygenase activity	NA	K20556	1.393	NA	promoter
104905432	1-aminocyclopropane-1-carboxylate oxidase homolog 4-like	#N/A	GO:0046872//metal ion binding;GO:0016491//oxidoreductase activity	NA	K06892//feruloyl-CoA ortho-hydroxylase [EC:1.14.11.-];K13229	NA	3.203	gene
104905427	protein trichome birefringence-like 19	GO:0005794//Golgi apparatus;GO:0016021//integral component of membrane	GO:0016413//O-acetyltransferase activity	NA	K03165//DNA topoisomerase III [EC:5.99.1.2]	NA	1.735	gene
104905422	brefeldin A-inhibited guanine nucleotide-exchange protein 2	#N/A	GO:0005086//ARF guanyl-nucleotide exchange factor activity	GO:0032012//regulation of ARF protein signal transduction	K18442//brefeldin A-inhibited guanine nucleotide-exchange protein	3.663	NA	promoter
104905413	proteasome subunit beta type-1	GO:0005634//nucleus;GO:0005737//cytoplasm;GO:0005839//proteasome core complex	GO:0004175//endopeptidase activity;GO:0004298//threonine-type endopeptidase activity	GO:0051603//proteolysis involved in cellular protein catabolic process;GO:0043161//proteasome-mediated ubiquitin-dependent protein catabolic process;GO:0010499//proteasomal ubiquitin-independent protein catabolic process;GO:0010498//proteasomal protein catabolic process	K02732//20S proteasome subunit beta 6 [EC:3.4.25.1]	NA	4.912	gene
104905384	protein NRT1/ PTR FAMILY 7.3-like	GO:0016021//integral component of membrane	GO:0022857//transmembrane transporter activity	NA	K14638//solute carrier family 15 (peptide/histidine transporter), member 3/4	NA	1.608	gene
104905383	arginase 1, mitochondrial	#N/A	GO:0008783//agmatinase activity;GO:0046872//metal ion binding;GO:0004053//arginase activity;GO:0016813//hydrolase activity, acting on carbon-nitrogen (but not peptide) bonds, in linear amidines	GO:0033389//putrescine biosynthetic process from arginine, using agmatinase	K01476//arginase [EC:3.5.3.1]	1.994	NA	promoter
104905382	IST1 homolog	#N/A	NA	GO:0015031//protein transport	K19476//vacuolar protein sorting-associated protein IST1	1.994	NA	promoter
104905376	methionine aminopeptidase 1A	#N/A	GO:0046872//metal ion binding;GO:0070006//metalloaminopeptidase activity	GO:0070084//protein initiator methionine removal	K01265//methionyl aminopeptidase [EC:3.4.11.18]	NA	-4.763	gene
104905372	eukaryotic translation initiation factor 3 subunit M-like	GO:0071541//eukaryotic translation initiation factor 3 complex, eIF3m;GO:0016282//eukaryotic 43S preinitiation complex;GO:0033290//eukaryotic 48S preinitiation complex;GO:0005852//eukaryotic translation initiation factor 3 complex	GO:0003743//translation initiation factor activity	GO:0001732//formation of cytoplasmic translation initiation complex;GO:0002183//cytoplasmic translational initiation	K15030//translation initiation factor 3 subunit M	2.098	NA	promoter
104905325	3-hydroxyisobutyryl-CoA hydrolase-like protein 1, mitochondrial	#N/A	GO:0003860//3-hydroxyisobutyryl-CoA hydrolase activity	NA	K05605//3-hydroxyisobutyryl-CoA hydrolase [EC:3.1.2.4]	NA	2.44	gene
104905318	chromodomain-helicase-DNA-binding protein 1-like	NA	GO:0005524//ATP binding	NA	K20092//chromodomain-helicase-DNA-binding protein 1-like [EC:3.6.4.12]	-5.923	NA	promoter
104905305	dnaJ protein homolog 2-like	#N/A	GO:0046872//metal ion binding;GO:0005524//ATP binding;GO:0051082//unfolded protein binding;GO:0031072//heat shock protein binding	GO:0006457//protein folding;GO:0009408//response to heat	K09503//DnaJ homolog subfamily A member 2	2.057	NA	promoter
104905270	tRNA wybutosine-synthesizing protein 4	GO:0016020//membrane;GO:0005737//cytoplasm	GO:0008168//methyltransferase activity	GO:0032259//methylation	K15451//tRNA wybutosine-synthesizing protein 4 [EC:2.1.1.290 2.3.1.231]	NA	-2.331	gene
104905265	ATPase 7, plasma membrane-type	GO:0016021//integral component of membrane;GO:0005886//plasma membrane	GO:0005524//ATP binding;GO:0008553//proton-exporting ATPase activity, phosphorylative mechanism	GO:1902600//proton transmembrane transport;GO:0120029//proton export across plasma membrane;GO:0051453//regulation of intracellular pH	K01535//H+-transporting ATPase [EC:7.1.2.1]	-0.556	-1.603	both
104905255	ras-related protein RABD2a	#N/A	GO:0005525//GTP binding;GO:0003924//GTPase activity	NA	K07874//Ras-related protein Rab-1A	-2.922	NA	promoter
104905254	dol-P-Man:Man(7)GlcNAc(2)-PP-Dol alpha-1,6-mannosyltransferase	GO:0005788//endoplasmic reticulum lumen;GO:0016021//integral component of membrane;GO:0005789//endoplasmic reticulum membrane	GO:0052824//dolichyl-pyrophosphate Man7GlcNAc2 alpha-1,6-mannosyltransferase activity	GO:0006488//dolichol-linked oligosaccharide biosynthetic process	K03847//alpha-1,6-mannosyltransferase [EC:2.4.1.260]	-2.922	-1.52	both
104905227	monothiol glutaredoxin-S1-like	NA	GO:0015035//protein disulfide oxidoreductase activity;GO:0009055//electron transfer activity	GO:0045454//cell redox homeostasis	K03676//glutaredoxin 3	NA	1.432	gene
104905225	probable dolichyl pyrophosphate Glc1Man9GlcNAc2 alpha-1,3-glucosyltransferase	GO:0016021//integral component of membrane;GO:0005789//endoplasmic reticulum membrane	GO:0042283//dolichyl pyrophosphate Glc1Man9GlcNAc2 alpha-1,3-glucosyltransferase activity	GO:0006490//oligosaccharide-lipid intermediate biosynthetic process;GO:0006486//protein glycosylation	K03849//alpha-1,3-glucosyltransferase [EC:2.4.1.265]	NA	2.824	gene
104905224	E3 ubiquitin-protein ligase ATL4	GO:0016021//integral component of membrane	NA	NA	K10663	2.356	NA	promoter
104905216	dynamin-related protein 1E	#N/A	GO:0005525//GTP binding;GO:0003924//GTPase activity	NA	K01528//dynamin GTPase [EC:3.6.5.5]	NA	2.207	gene
104905215	NAD-dependent malic enzyme 65 kDa isoform, mitochondrial	GO:0005739//mitochondrion	GO:0004471//malate dehydrogenase (decarboxylating) (NAD+) activity;GO:0046872//metal ion binding;GO:0004470//malic enzyme activity;GO:0051287//NAD binding	GO:0006090//pyruvate metabolic process;GO:0006108//malate metabolic process	K00028	NA	4.408	gene
104905211	protein ECERIFERUM 1-like	GO:0016021//integral component of membrane	GO:0005506//iron ion binding;GO:0016491//oxidoreductase activity	GO:0008610//lipid biosynthetic process	K15404	NA	-2.551	gene
104905181	ATP-dependent zinc metalloprotease FTSH 2, chloroplastic	GO:0016021//integral component of membrane;GO:0009941//chloroplast envelope	GO:0004222//metalloendopeptidase activity;GO:0005524//ATP binding;GO:0008270//zinc ion binding	NA	K03798	4.56	NA	promoter
104905116	flavanone 3-dioxygenase-like	NA	GO:0046872//metal ion binding;GO:0016491//oxidoreductase activity	NA	K00475	NA	5.541	gene
104905102	UDP-glycosyltransferase 76C4-like	#N/A	GO:0016758//transferase activity, transferring hexosyl groups	NA	K13493//cytokinin-N-glucosyltransferase [EC:2.4.1.-];K00699//glucuronosyltransferase [EC:2.4.1.17]	-1.945	NA	promoter
104905096	major facilitator superfamily domain-containing protein 12-like	GO:0016021//integral component of membrane	GO:0015293//symporter activity	GO:0008643//carbohydrate transport	NA	-1.392	-1.053	both
104905079	espin-like	GO:0016021//integral component of membrane	NA	NA	K15503//serine/threonine-protein phosphatase 6 regulatory ankyrin repeat subunit B;K21952//CASK-interacting protein	NA	-3.867	gene
104905060	phenazine biosynthesis-like domain-containing protein 1	GO:0005737//cytoplasm	GO:0004177//aminopeptidase activity	GO:0009058//biosynthetic process	NA	NA	5.687	gene
104904998	rop guanine nucleotide exchange factor 7	#N/A	GO:0005089//Rho guanyl-nucleotide exchange factor activity	NA	K10418//dynein light chain LC8-type	-1.078	NA	promoter
104904997	glutaredoxin-C9-like	#N/A	GO:0015035//protein disulfide oxidoreductase activity;GO:0009055//electron transfer activity	GO:0045454//cell redox homeostasis	K03676//glutaredoxin 3	1.75	NA	promoter
104904986	scopoletin glucosyltransferase-like	#N/A	GO:0016758//transferase activity, transferring hexosyl groups	NA	K13496	NA	4.082	gene
104904985	phenylalanine--tRNA ligase, chloroplastic/mitochondrial	GO:0005737//cytoplasm	GO:0004826//phenylalanine-tRNA ligase activity;GO:0005524//ATP binding;GO:0000049//tRNA binding	GO:0006432//phenylalanyl-tRNA aminoacylation	K01889//phenylalanyl-tRNA synthetase alpha chain [EC:6.1.1.20]	1.218	4.082	both
104904978	cysteine proteinase RD21a-like	NA	GO:0008234//cysteine-type peptidase activity	NA	K16292//KDEL-tailed cysteine endopeptidase [EC:3.4.22.-];K01365//cathepsin L [EC:3.4.22.15]	-2.131	NA	promoter
104904965	transmembrane 9 superfamily member 2	GO:0016021//integral component of membrane	NA	NA	K17085//transmembrane 9 superfamily member 1	NA	2.867	gene
104904947	PRKR-interacting protein 1	NA	GO:0003725//double-stranded RNA binding	NA	NA	NA	-1.754	gene
104904937	methylthioribose kinase	GO:0005829//cytosol	GO:0046522//S-methyl-5-thioribose kinase activity;GO:0042802//identical protein binding	GO:0009086//methionine biosynthetic process	K00899//5-methylthioribose kinase [EC:2.7.1.100]	-1.954	NA	promoter
104904900	protein RAE1-like	GO:0005643//nuclear pore	GO:0043130//ubiquitin binding;GO:0003723//RNA binding	GO:0000972//transcription-dependent tethering of RNA polymerase II gene DNA at nuclear periphery;GO:0006405//RNA export from nucleus	K14298//mRNA export factor	NA	1.806	gene
104904891	wall-associated receptor kinase-like 6	GO:0016021//integral component of membrane	GO:0005524//ATP binding;GO:0004672//protein kinase activity;GO:0030247//polysaccharide binding	NA	K04733//interleukin-1 receptor-associated kinase 4 [EC:2.7.11.1]	1.961	NA	promoter
104904889	aquaporin NIP6-1	GO:0016021//integral component of membrane	GO:0015267//channel activity	NA	K09874	-1.669	NA	promoter
104904886	probable CCR4-associated factor 1 homolog 6	GO:0000932//P-body;GO:0030015//CCR4-NOT core complex	GO:0004535//poly(A)-specific ribonuclease activity;GO:0016740//transferase activity;GO:0003676//nucleic acid binding	GO:0043928//exonucleolytic catabolism of deadenylated mRNA;GO:0017148//negative regulation of translation	K12581//CCR4-NOT transcription complex subunit 7/8	1.31	NA	promoter
104904885	stromal cell-derived factor 2-like protein	GO:0016021//integral component of membrane	NA	NA	NA	NA	1.31	gene
104904847	serine carboxypeptidase-like 18	NA	GO:0004185//serine-type carboxypeptidase activity	NA	K16296//serine carboxypeptidase-like clade I [EC:3.4.16.-]	NA	-1.373	gene
104904845	pre-mRNA-processing protein 40A-like	#N/A	NA	GO:0045292//mRNA cis splicing, via spliceosome	K12821//pre-mRNA-processing factor 40	NA	4.644	gene
104904834	serine/threonine-protein kinase TOR	#N/A	GO:0004674//protein serine/threonine kinase activity;GO:0005524//ATP binding;GO:0044877//protein-containing complex binding	NA	K07203//serine/threonine-protein kinase mTOR [EC:2.7.11.1]	NA	-3.249	gene
104904828	pathogenesis-related protein PR-1 type-like	GO:0005576//extracellular region	NA	NA	K13449	-1.378	NA	promoter
104904803	geraniol 8-hydroxylase-like	GO:0016021//integral component of membrane	GO:0016705//oxidoreductase activity, acting on paired donors, with incorporation or reduction of molecular oxygen;GO:0020037//heme binding;GO:0005506//iron ion binding;GO:0004497//monooxygenase activity	NA	K20556	NA	3.281	gene
104904785	DNA polymerase V	GO:0005730//nucleolus	GO:0003677//DNA binding;GO:0008134//transcription factor binding	GO:0006355//regulation of transcription, DNA-templated	K02331//DNA polymerase phi [EC:2.7.7.7]	NA	-2.316	gene
104904772	MADS-box transcription factor 23-like	GO:0005634//nucleus	GO:0000977//RNA polymerase II transcription regulatory region sequence-specific DNA binding;GO:0003700//DNA-binding transcription factor activity;GO:0046983//protein dimerization activity	GO:0045944//positive regulation of transcription by RNA polymerase II	K09264//MADS-box transcription factor, plant	NA	-1.37	gene
104904768	putative glutamine amidotransferase YLR126C	NA	NA	GO:0006541//glutamine metabolic process	K22314//glucosinolate gamma-glutamyl hydrolase [EC:3.4.19.16]	NA	-1.404	gene
104904760	mavicyanin	NA	GO:0009055//electron transfer activity	NA	K03006//DNA-directed RNA polymerase II subunit RPB1 [EC:2.7.7.6]	-1.271	NA	promoter
104904758	ATP-dependent zinc metalloprotease FtsH	NA	GO:0004222//metalloendopeptidase activity;GO:0005524//ATP binding	GO:0042026//protein refolding	K03798	NA	-1.271	gene
104904753	homeobox-leucine zipper protein ATHB-15-like	GO:0005634//nucleus	GO:0008289//lipid binding;GO:0003677//DNA binding	NA	K09338//homeobox-leucine zipper protein	NA	3.691	gene
104904731	beta-ureidopropionase	#N/A	NA	GO:0006807//nitrogen compound metabolic process	K01431//beta-ureidopropionase [EC:3.5.1.6]	-1.097	NA	promoter
104904713	transcription factor bHLH68-like	#N/A	GO:0046983//protein dimerization activity	NA	K16189;K05765//cofilin;K14638//solute carrier family 15 (peptide/histidine transporter), member 3/4	NA	4.742	gene
104904708	aquaporin TIP2-1	GO:0016021//integral component of membrane	GO:0015267//channel activity	NA	K09873	NA	2.142	gene
104904706	zinc phosphodiesterase ELAC protein 2	#N/A	GO:0016891//endoribonuclease activity, producing 5'-phosphomonoesters	GO:0042779//tRNA 3'-trailer cleavage	K00784//ribonuclease Z [EC:3.1.26.11]	NA	-4.591	gene
104904702	zinc transporter 1-like	GO:0016021//integral component of membrane	GO:0005385//zinc ion transmembrane transporter activity	NA	K14709//solute carrier family 39 (zinc transporter), member 1/2/3	2.334	1.447	both
104904700	probable plastidic glucose transporter 3	GO:0005768//endosome;GO:0016021//integral component of membrane;GO:0005802//trans-Golgi network	GO:0022857//transmembrane transporter activity	GO:0008643//carbohydrate transport	K08145//MFS transporter, SP family, solute carrier family 2 (facilitated glucose transporter), member 8	3.605	NA	promoter
104904697	magnesium transporter MRS2-4	GO:0016021//integral component of membrane	NA	GO:0006811//ion transport	K16075//magnesium transporter	NA	1.201	gene
104904683	UDP-glycosyltransferase 82A1	#N/A	GO:0016758//transferase activity, transferring hexosyl groups	NA	K04628//ceramide galactosyltransferase [EC:2.4.1.47];K13692;K13691	NA	-2.808	gene
104904682	protein disulfide isomerase-like 1-6	#N/A	NA	GO:0045454//cell redox homeostasis	K09580//protein disulfide-isomerase A1 [EC:5.3.4.1]	NA	23.076	gene
104904655	probable sulfate transporter 3.4	GO:0016021//integral component of membrane	GO:0008271//secondary active sulfate transmembrane transporter activity	NA	K17471//sulfate transporter 3	-1.155	NA	promoter
104904652	probable protein S-acyltransferase 12	GO:0016021//integral component of membrane	GO:0019706//protein-cysteine S-palmitoyltransferase activity	GO:0007165//signal transduction	K20028//palmitoyltransferase ZDHHC2/15/20 [EC:2.3.1.225]	1.166	NA	promoter
104904629	3beta-hydroxysteroid-dehydrogenase/decarboxylase isoform 2-like	GO:0016021//integral component of membrane;GO:0005789//endoplasmic reticulum membrane	GO:0003854//3-beta-hydroxy-delta5-steroid dehydrogenase activity	GO:0006694//steroid biosynthetic process	K07748//sterol-4alpha-carboxylate 3-dehydrogenase (decarboxylating) [EC:1.1.1.170]	NA	2.245	gene
104904603	cytochrome c oxidase subunit 5b-2, mitochondrial	GO:0005740//mitochondrial envelope	GO:0004129//cytochrome-c oxidase activity	NA	K02265//cytochrome c oxidase subunit 5b	NA	2.515	gene
104904554	palmitoyl-monogalactosyldiacylglycerol delta-7 desaturase, chloroplastic-like	GO:0016021//integral component of membrane	GO:0016717//oxidoreductase activity, acting on paired donors, with oxidation of a pair of donors resulting in the reduction of molecular oxygen to two molecules of water	GO:0006633//fatty acid biosynthetic process	K20416	NA	4.941	gene
104904547	pyrophosphate-energized vacuolar membrane proton pump 1	GO:0016021//integral component of membrane	GO:0004427//inorganic diphosphatase activity;GO:0009678//pyrophosphate hydrolysis-driven proton transmembrane transporter activity	NA	K23025	NA	4.942	gene
104904501	DNA mismatch repair protein MSH1, mitochondrial	#N/A	GO:0005524//ATP binding;GO:0030983//mismatched DNA binding	GO:0006298//mismatch repair	K08737//DNA mismatch repair protein MSH6	NA	-2.811	gene
104904499	ribulose bisphosphate carboxylase/oxygenase activase, chloroplastic	GO:0009570//chloroplast stroma	GO:0005524//ATP binding	NA	K09753//cinnamoyl-CoA reductase [EC:1.2.1.44];K02960//small subunit ribosomal protein S16e	NA	-1.054	gene
104904493	acetylornithine aminotransferase, mitochondrial	#N/A	GO:0008483//transaminase activity;GO:0030170//pyridoxal phosphate binding	GO:0006525//arginine metabolic process	K00818//acetylornithine aminotransferase [EC:2.6.1.11]	NA	-4	gene
104904488	probable splicing factor 3A subunit 1	#N/A	GO:0003723//RNA binding	GO:0006396//RNA processing	K00784//ribonuclease Z [EC:3.1.26.11];K02945;K10865//double-strand break repair protein MRE11;K14800//pre-rRNA-processing protein TSR2;K01933;K12825//splicing factor 3A subunit 1	1.474	NA	promoter
104904480	protein CHROMATIN REMODELING 25	#N/A	GO:0005524//ATP binding	NA	K10875//DNA repair and recombination protein RAD54 and RAD54-like protein [EC:3.6.4.-]	-2.328	NA	promoter
104904478	zinc-binding alcohol dehydrogenase domain-containing protein 2	NA	GO:0008270//zinc ion binding;GO:0016491//oxidoreductase activity	NA	K07119//uncharacterized protein	NA	1.272	gene
104904477	B3 domain-containing protein At3g19184	GO:0005634//nucleus	GO:0003677//DNA binding	NA	K10405//kinesin family member C1;K14016//ubiquitin fusion degradation protein 1	NA	2.821	gene
104904475	sister chromatid cohesion 1 protein 3	GO:0008278//cohesin complex	NA	GO:0007062//sister chromatid cohesion	K06670//cohesin complex subunit SCC1	NA	1.287	gene
104904474	probable carboxylesterase 2	NA	GO:0016787//hydrolase activity	NA	K17872;K13258;K20506	3.925	3.925	both
104904465	peptidyl-prolyl cis-trans isomerase CYP40	GO:0005829//cytosol	GO:0003755//peptidyl-prolyl cis-trans isomerase activity	GO:0006457//protein folding;GO:0010582//floral meristem determinacy;GO:0010050//vegetative phase change	K05864//peptidyl-prolyl isomerase D [EC:5.2.1.8]	NA	1.861	gene
104904459	serine/threonine-protein kinase SRK2E	NA	GO:0004674//protein serine/threonine kinase activity;GO:0005524//ATP binding	NA	K14498//serine/threonine-protein kinase SRK2 [EC:2.7.11.1]	NA	21.63	gene
104904452	phragmoplast orienting kinesin 2	NA	GO:0005524//ATP binding;GO:0003777//microtubule motor activity;GO:0008017//microtubule binding	GO:0007018//microtubule-based movement	K10400//kinesin family member 15	NA	-1.141	gene
104904449	protein SRG1-like	NA	GO:0046872//metal ion binding;GO:0016491//oxidoreductase activity	NA	K05278//flavonol synthase [EC:1.14.20.6];K06892//feruloyl-CoA ortho-hydroxylase [EC:1.14.11.-]	NA	-1.756	gene
104904444	protein SRG1-like	NA	GO:0016491//oxidoreductase activity	NA	K05282;K04124	NA	1.751	gene
104904435	cell division cycle-associated 7-like protein	NA	NA	GO:0006355//regulation of transcription, DNA-templated	K18183//cytochrome c oxidase assembly protein subunit 19;K15601//lysine-specific demethylase 3 [EC:1.14.11.-]	NA	2.715	gene
104904431	transmembrane protein 45A	GO:0016021//integral component of membrane	NA	NA	NA	NA	1.34	gene
104904425	allene oxide synthase-like	NA	GO:0016705//oxidoreductase activity, acting on paired donors, with incorporation or reduction of molecular oxygen;GO:0020037//heme binding;GO:0005506//iron ion binding;GO:0004497//monooxygenase activity	NA	K01723//hydroperoxide dehydratase [EC:4.2.1.92]	NA	1.291	gene
104904419	mitochondrial import receptor subunit TOM6 homolog	GO:0005742//mitochondrial outer membrane translocase complex	NA	NA	NA	NA	4.86	gene
104904412	hemoglobin-2-like	#N/A	GO:0046872//metal ion binding;GO:0020037//heme binding;GO:0005344//oxygen carrier activity;GO:0019825//oxygen binding	NA	K21894//cytoglobin	-2.266	NA	promoter
104904409	peroxisomal membrane protein 11A	GO:0005779//integral component of peroxisomal membrane	NA	GO:0016559//peroxisome fission	K13352//peroxin-11B	1.054	NA	promoter
104904404	probable LRR receptor-like serine/threonine-protein kinase At3g47570	GO:0016021//integral component of membrane	GO:0004674//protein serine/threonine kinase activity;GO:0005524//ATP binding	NA	K04730//interleukin-1 receptor-associated kinase 1 [EC:2.7.11.1];K13428	NA	-1.692	gene
104904398	phospholipase A-2-activating protein	#N/A	GO:0043130//ubiquitin binding	GO:0043161//proteasome-mediated ubiquitin-dependent protein catabolic process	K14018//phospholipase A-2-activating protein	-0.583	-3.313	both
104904386	thioredoxin M3, chloroplastic	#N/A	NA	GO:0045454//cell redox homeostasis	K03671//thioredoxin 1	NA	4.587	gene
104904368	peptidyl-prolyl cis-trans isomerase FKBP20-1	#N/A	GO:0004798//thymidylate kinase activity;GO:0003755//peptidyl-prolyl cis-trans isomerase activity;GO:0005524//ATP binding	GO:0006233//dTDP biosynthetic process	K01802//peptidylprolyl isomerase [EC:5.2.1.8]	NA	-1.744	gene
104904363	cyclase-associated protein 1	#N/A	GO:0003779//actin binding	GO:0000902//cell morphogenesis;GO:0007010//cytoskeleton organization	K17261//adenylyl cyclase-associated protein	1.244	NA	promoter
104904344	protein CHLOROPLAST IMPORT APPARATUS 2-like	GO:0005634//nucleus	NA	NA	K12128;K12129	NA	6.964	gene
104904321	diaminopimelate decarboxylase 2, chloroplastic-like	NA	GO:0008836//diaminopimelate decarboxylase activity	GO:0009089//lysine biosynthetic process via diaminopimelate	K01586//diaminopimelate decarboxylase [EC:4.1.1.20]	2.322	NA	promoter
104904311	26S protease regulatory subunit 10B homolog A	GO:0005737//cytoplasm	GO:0016787//hydrolase activity;GO:0005524//ATP binding	GO:0030163//protein catabolic process	K03064//26S proteasome regulatory subunit T4	NA	-1.478	gene
104904296	DNA replication licensing factor MCM4	GO:0005634//nucleus;GO:0042555//MCM complex	GO:0003677//DNA binding;GO:0005524//ATP binding;GO:0003678//DNA helicase activity	GO:0006270//DNA replication initiation	K02212//DNA replication licensing factor MCM4 [EC:3.6.4.12]	NA	-3.299	gene
104904285	non-specific lipid-transfer protein-like	#N/A	GO:0008289//lipid binding	GO:0006869//lipid transport	NA	NA	-1.577	gene
104904262	zinc finger CCCH domain-containing protein 19	#N/A	GO:0046872//metal ion binding;GO:0003677//DNA binding	NA	K14306//nuclear pore complex protein Nup62;K01062//platelet-activating factor acetylhydrolase [EC:3.1.1.47]	NA	-3.139	gene
104904260	cellular nucleic acid-binding protein-like	#N/A	GO:0008270//zinc ion binding;GO:0003676//nucleic acid binding	NA	K09250//cellular nucleic acid-binding protein	NA	4.86	gene
104904253	kinesin-like protein NACK1	GO:0005874//microtubule	GO:0005524//ATP binding;GO:0003777//microtubule motor activity;GO:0008017//microtubule binding	GO:0007018//microtubule-based movement	K11498//centromeric protein E	NA	4.654	gene
104904252	NADH dehydrogenase [ubiquinone] 1 beta subcomplex subunit 9	GO:0005739//mitochondrion	NA	GO:0006120//mitochondrial electron transport, NADH to ubiquinone	K03965//NADH dehydrogenase (ubiquinone) 1 beta subcomplex subunit 9	NA	3.59	gene
104904249	epimerase family protein SDR39U1 homolog, chloroplastic	#N/A	GO:0003824//catalytic activity	NA	K07071//uncharacterized protein	-1.111	NA	promoter
104904245	arginine decarboxylase-like	NA	GO:0008792//arginine decarboxylase activity	GO:0008295//spermidine biosynthetic process;GO:0006527//arginine catabolic process	K01583//arginine decarboxylase [EC:4.1.1.19]	NA	-5.58	gene
104904107	ent-kaur-16-ene synthase, chloroplastic	NA	GO:0000287//magnesium ion binding;GO:0003824//catalytic activity;GO:0010333//terpene synthase activity	GO:0080110//sporopollenin biosynthetic process	K13082;K04121	NA	-1.002	gene
104904104	AP-1 complex subunit sigma-2	GO:0030117//membrane coat	NA	GO:0006886//intracellular protein transport;GO:0016192//vesicle-mediated transport	K12394//AP-1 complex subunit sigma 1/2	4.804	NA	promoter
104904095	brefeldin A-inhibited guanine nucleotide-exchange protein 1	#N/A	GO:0005086//ARF guanyl-nucleotide exchange factor activity	GO:0032012//regulation of ARF protein signal transduction	K18442//brefeldin A-inhibited guanine nucleotide-exchange protein	3.824	NA	promoter
104904087	pentatricopeptide repeat-containing protein At2g03880, mitochondrial	#N/A	GO:0008270//zinc ion binding	NA	K22565//COMM domain containing 9;K22733//magnesium transporter	-2.378	4.399	both
104904084	xylem cysteine proteinase 2	#N/A	GO:0008234//cysteine-type peptidase activity	NA	K16290//xylem cysteine proteinase [EC:3.4.22.-]	-2.006	-0.062	both
104904076	monosaccharide-sensing protein 2	GO:0016021//integral component of membrane	GO:0022857//transmembrane transporter activity	NA	K08150//MFS transporter, SP family, solute carrier family 2 (myo-inositol transporter), member 13	1.091	NA	promoter
104904068	nucleolar complex protein 4 homolog	#N/A	NA	GO:0042254//ribosome biogenesis	K14771//U3 small nucleolar RNA-associated protein 19	-1.271	NA	promoter
104904050	polyadenylate-binding protein 2-like	NA	GO:0003723//RNA binding	NA	K14396//polyadenylate-binding protein 2	NA	-2.086	gene
104904016	ADP-ribosylation factor-like protein 5	GO:0016021//integral component of membrane	GO:0005525//GTP binding	NA	K07950//ADP-ribosylation factor-like protein 5B	NA	1.143	gene
104904011	CD2 antigen cytoplasmic tail-binding protein 2 homolog	GO:0005682//U5 snRNP	NA	NA	K13099//CD2 antigen cytoplasmic tail-binding protein 2	-1.174	NA	promoter
104904001	translocase of chloroplast 34	GO:0016021//integral component of membrane;GO:0009707//chloroplast outer membrane	GO:0046872//metal ion binding;GO:0016787//hydrolase activity;GO:0015450//P-P-bond-hydrolysis-driven protein transmembrane transporter activity;GO:0005525//GTP binding	GO:0006886//intracellular protein transport	NA	NA	2.294	gene
104903947	thaumatin-like protein 1	GO:0005576//extracellular region;GO:0016021//integral component of membrane	NA	GO:0006952//defense response	K04733//interleukin-1 receptor-associated kinase 4 [EC:2.7.11.1]	1.429	NA	promoter
104903944	probable transporter mch1	GO:0016021//integral component of membrane	NA	NA	K14794//ribosomal RNA-processing protein 12	NA	-3.089	gene
104903931	synaptotagmin-2	GO:0016021//integral component of membrane	GO:0008289//lipid binding	GO:0006869//lipid transport	K04733//interleukin-1 receptor-associated kinase 4 [EC:2.7.11.1];K19916//double C2-like domain-containing protein alpha;K03511//DNA polymerase kappa [EC:2.7.7.7]	NA	1.637	gene
104903930	E3 ubiquitin-protein ligase UPL3	#N/A	GO:0004842//ubiquitin-protein transferase activity	NA	K10590//E3 ubiquitin-protein ligase TRIP12 [EC:2.3.2.26]	NA	2.057	gene
104903928	beta-galactosidase 14-like	#N/A	GO:0030246//carbohydrate binding;GO:0004565//beta-galactosidase activity	GO:0005975//carbohydrate metabolic process	K12309//beta-galactosidase [EC:3.2.1.23]	NA	-3.119	gene
104903925	ubiquitin-conjugating enzyme E2 28-like	#N/A	GO:0005524//ATP binding;GO:0016740//transferase activity	NA	K06689//ubiquitin-conjugating enzyme E2 D [EC:2.3.2.23]	NA	-1.419	gene
104903921	heavy metal-associated isoprenylated plant protein 26-like	#N/A	GO:0046872//metal ion binding	GO:0030001//metal ion transport	K22763//deubiquitinase DESI2 [EC:3.4.19.12];K12848//U4/U6.U5 tri-snRNP component SNU23;K07213//copper chaperone;K10752//histone-binding protein RBBP4	1.287	NA	promoter
104903906	probable L-type lectin-domain containing receptor kinase S.7	GO:0016021//integral component of membrane	GO:0030246//carbohydrate binding	NA	K04733//interleukin-1 receptor-associated kinase 4 [EC:2.7.11.1]	-1.875	-0.337	both
104903895	probable protein phosphatase 2C 60	NA	GO:0046872//metal ion binding;GO:0004724//magnesium-dependent protein serine/threonine phosphatase activity;GO:0004722//protein serine/threonine phosphatase activity	NA	K01102//pyruvate dehydrogenase phosphatase [EC:3.1.3.43]	NA	2.58	gene
104903889	dnaJ homolog subfamily C member 17-like	#N/A	GO:0003723//RNA binding	NA	K09537//DnaJ homolog subfamily C member 17	NA	2.229	gene
104903871	heterodimeric geranylgeranyl pyrophosphate synthase small subunit, chloroplastic	#N/A	GO:0016740//transferase activity	GO:0008299//isoprenoid biosynthetic process	K13789	NA	-1.346	gene
104903870	(RS)-norcoclaurine 6-O-methyltransferase-like	NA	GO:0008171//O-methyltransferase activity;GO:0046983//protein dimerization activity	GO:0032259//methylation	K22588	-1.024	NA	promoter
104903846	proliferating cell nuclear antigen-like	GO:0005634//nucleus	GO:0003677//DNA binding;GO:0030337//DNA polymerase processivity factor activity	GO:0006260//DNA replication;GO:0006275//regulation of DNA replication	K04802//proliferating cell nuclear antigen	-1.041	NA	promoter
104903843	expansin-like A1	GO:0005576//extracellular region	NA	NA	K20628//expansin	NA	-1.083	gene
104903830	cation transporter HKT8-like	GO:0016021//integral component of membrane	GO:0008324//cation transmembrane transporter activity	NA	NA	NA	21.693	gene
104903827	isocitrate dehydrogenase [NAD] regulatory subunit 1, mitochondrial	#N/A	GO:0004449//isocitrate dehydrogenase (NAD+) activity	GO:0006099//tricarboxylic acid cycle	K00030//isocitrate dehydrogenase (NAD+) [EC:1.1.1.41]	1.714	NA	promoter
104903808	Niemann-Pick C1 protein	GO:0016021//integral component of membrane	GO:0005319//lipid transporter activity	NA	K12385//Niemann-Pick C1 protein	NA	-2.134	gene
104903803	serine/threonine-protein kinase CDL1-like	NA	GO:0005524//ATP binding;GO:0004672//protein kinase activity	NA	K04733//interleukin-1 receptor-associated kinase 4 [EC:2.7.11.1]	NA	-1.405	gene
104903789	probable leucine-rich repeat receptor-like protein kinase At5g49770	GO:0016021//integral component of membrane	GO:0005524//ATP binding;GO:0004672//protein kinase activity	NA	K04733//interleukin-1 receptor-associated kinase 4 [EC:2.7.11.1]	-1.041	NA	promoter
104903779	ER membrane protein complex subunit 8/9 homolog	GO:0072546//ER membrane protein complex	NA	NA	NA	-1.141	NA	promoter
104903732	asparagine synthetase [glutamine-hydrolyzing]-like	NA	GO:0005524//ATP binding;GO:0004066//asparagine synthase (glutamine-hydrolyzing) activity	GO:0006541//glutamine metabolic process;GO:0006529//asparagine biosynthetic process	K01953//asparagine synthase (glutamine-hydrolysing) [EC:6.3.5.4]	NA	-6.039	gene
104903729	ATP-dependent 6-phosphofructokinase 3-like	GO:0005737//cytoplasm	GO:0046872//metal ion binding;GO:0003872//6-phosphofructokinase activity;GO:0005524//ATP binding	GO:0006002//fructose 6-phosphate metabolic process	K00850//6-phosphofructokinase 1 [EC:2.7.1.11]	NA	1.034	gene
104903712	SURP and G-patch domain-containing protein 1-like protein	#N/A	GO:0003723//RNA binding	GO:0006396//RNA processing	K13096//splicing factor 4	2.213	NA	promoter
104903711	ferredoxin-1, chloroplastic-like	GO:0009507//chloroplast	GO:0009055//electron transfer activity;GO:0046872//metal ion binding;GO:0051537//2 iron, 2 sulfur cluster binding	NA	K02639//ferredoxin	-1.216	NA	promoter
104903703	sedoheptulose-1,7-bisphosphatase, chloroplastic	GO:0005737//cytoplasm;GO:0009507//chloroplast	GO:0046872//metal ion binding;GO:0050278//sedoheptulose-bisphosphatase activity;GO:0016791//phosphatase activity;GO:0042132//fructose 1,6-bisphosphate 1-phosphatase activity	GO:0005986//sucrose biosynthetic process;GO:0006002//fructose 6-phosphate metabolic process;GO:0006094//gluconeogenesis;GO:0006000//fructose metabolic process;GO:0019253//reductive pentose-phosphate cycle;GO:0005975//carbohydrate metabolic process;GO:0030388//fructose 1,6-bisphosphate metabolic process	K01100	1.066	NA	promoter
104903700	tRNA (uracil(54)-C(5))-methyltransferase homolog-B	#N/A	GO:0008173//RNA methyltransferase activity	GO:0006396//RNA processing	K15332//tRNA (uracil-5-)-methyltransferase [EC:2.1.1.-]	NA	-21.267	gene
104903681	geranylgeranyl transferase type-2 subunit beta-like	GO:0005968//Rab-protein geranylgeranyltransferase complex	GO:0046872//metal ion binding;GO:0004663//Rab geranylgeranyltransferase activity	GO:0018344//protein geranylgeranylation	K05956//geranylgeranyl transferase type-2 subunit beta [EC:2.5.1.60]	1.375	NA	promoter
104903680	brefeldin A-inhibited guanine nucleotide-exchange protein 5	NA	GO:0005086//ARF guanyl-nucleotide exchange factor activity	GO:0032012//regulation of ARF protein signal transduction	K13462//guanine nucleotide-exchange factor	NA	-3.646	gene
104903679	early nodulin-like protein 3	GO:0016021//integral component of membrane;GO:0046658//anchored component of plasma membrane	GO:0009055//electron transfer activity	NA	NA	NA	1.357	gene
104903678	programmed cell death protein 2-like	GO:0005737//cytoplasm	GO:0046872//metal ion binding	NA	K14801//pre-rRNA-processing protein TSR4	NA	5.762	gene
104903674	putative phosphatidylinositol N-acetylglucosaminyltransferase subunit C	GO:0016021//integral component of membrane	GO:0017176//phosphatidylinositol N-acetylglucosaminyltransferase activity	GO:0006506//GPI anchor biosynthetic process	K03859//phosphatidylinositol glycan, class C	-18.8	NA	promoter
104903659	mediator of RNA polymerase II transcription subunit 32-like	GO:0016592//mediator complex	NA	GO:0006355//regulation of transcription, DNA-templated;GO:0010150//leaf senescence;GO:0048364//root development;GO:0009631//cold acclimation	K11778//ditrans,polycis-polyprenyl diphosphate synthase [EC:2.5.1.87]	NA	-1.442	gene
104903658	nucleobase-ascorbate transporter 12	GO:0016021//integral component of membrane;GO:0005886//plasma membrane	GO:0022857//transmembrane transporter activity	NA	K14611//solute carrier family 23 (nucleobase transporter), member 1/2	NA	5.235	gene
104903614	putative SWI/SNF-related matrix-associated actin-dependent regulator of chromatin subfamily A member 3-like 2	#N/A	GO:0005524//ATP binding;GO:0008270//zinc ion binding;GO:0016818//hydrolase activity, acting on acid anhydrides, in phosphorus-containing anhydrides;GO:0003676//nucleic acid binding	NA	K15505	NA	1.053	gene
104903610	trans-resveratrol di-O-methyltransferase-like	#N/A	GO:0008171//O-methyltransferase activity;GO:0046983//protein dimerization activity	GO:0032259//methylation	K16040	1.802	NA	promoter
104903598	protein argonaute 1-like	#N/A	GO:0003676//nucleic acid binding	GO:0031047//gene silencing by RNA	K11593//eukaryotic translation initiation factor 2C	NA	1.905	gene
104903596	aspartic proteinase-like protein 2	#N/A	GO:0004190//aspartic-type endopeptidase activity	NA	K00924	-2.604	NA	promoter
104903593	probable sugar phosphate/phosphate translocator At1g06470	GO:0016021//integral component of membrane	NA	NA	K15280//solute carrier family 35, member C2	NA	4.133	gene
104903588	putative GPI-anchor transamidase	#N/A	GO:0008233//peptidase activity	NA	K05290//phosphatidylinositol glycan, class K [EC:2.6.-.-]	NA	-2.733	gene
104903586	actin-related protein 2/3 complex subunit 1B	GO:0005885//Arp2/3 protein complex;GO:0005737//cytoplasm	GO:0003779//actin binding	GO:0034314//Arp2/3 complex-mediated actin nucleation	K05757//actin related protein 2/3 complex, subunit 1A/1B	NA	2.81	gene
104903576	serine/threonine-protein phosphatase 5	GO:0016021//integral component of membrane	GO:0004721//phosphoprotein phosphatase activity	NA	K04460//serine/threonine-protein phosphatase 5 [EC:3.1.3.16]	NA	-3.48	gene
104903521	auxin transporter-like protein 2	GO:0016021//integral component of membrane	NA	NA	K13946//auxin influx carrier (AUX1 LAX family)	NA	-1.193	gene
104903519	phospholipase A1-IIdelta-like	#N/A	GO:0008970//phospholipase A1 activity	GO:0006629//lipid metabolic process	K00145//N-acetyl-gamma-glutamyl-phosphate reductase [EC:1.2.1.38]	NA	2.122	gene
104903505	L-gulonolactone oxidase-like	GO:0016020//membrane	GO:0003885//D-arabinono-1,4-lactone oxidase activity;GO:0071949//FAD binding	NA	K00103//L-gulonolactone oxidase [EC:1.1.3.8]	NA	1.113	gene
104903459	cytochrome P450 90A1	GO:0016021//integral component of membrane	GO:0016705//oxidoreductase activity, acting on paired donors, with incorporation or reduction of molecular oxygen;GO:0020037//heme binding;GO:0005506//iron ion binding;GO:0004497//monooxygenase activity	NA	K09588//cytochrome P450 family 90 subfamily A polypeptide 1 [EC:1.14.-.-]	NA	1.783	gene
104903447	NAC domain-containing protein 8-like	GO:0005634//nucleus	GO:0003677//DNA binding	GO:0006355//regulation of transcription, DNA-templated	NA	NA	-6.408	gene
104903444	50S ribosomal protein L12, chloroplastic	GO:0005840//ribosome	GO:0003735//structural constituent of ribosome	GO:0006412//translation	K02935//large subunit ribosomal protein L7/L12	-2.628	NA	promoter
104903426	translation factor GUF1 homolog, organellar chromatophore	NA	GO:0005525//GTP binding;GO:0003924//GTPase activity	NA	K06207	NA	3.461	gene
104903410	aspartate aminotransferase, mitochondrial	#N/A	GO:0004069//L-aspartate:2-oxoglutarate aminotransferase activity;GO:0030170//pyridoxal phosphate binding	GO:0009058//biosynthetic process;GO:0006520//cellular amino acid metabolic process	K14455//aspartate aminotransferase, mitochondrial [EC:2.6.1.1]	NA	3.581	gene
104903408	shaggy-related protein kinase eta	GO:0005829//cytosol;GO:0005737//cytoplasm	GO:0004674//protein serine/threonine kinase activity;GO:0005524//ATP binding	GO:0007165//signal transduction;GO:0032880//regulation of protein localization;GO:0006468//protein phosphorylation;GO:0009742//brassinosteroid mediated signaling pathway	K00924;K14502//protein brassinosteroid insensitive 2 [EC:2.7.11.1]	1.534	NA	promoter
104903393	peroxidase P7-like	NA	GO:0046872//metal ion binding;GO:0020037//heme binding;GO:0004601//peroxidase activity	GO:0006979//response to oxidative stress;GO:0042744//hydrogen peroxide catabolic process	K00430//peroxidase [EC:1.11.1.7]	1.352	1.352	both
104903392	peroxidase 4-like	GO:0005576//extracellular region	GO:0046872//metal ion binding;GO:0020037//heme binding;GO:0004601//peroxidase activity	GO:0006979//response to oxidative stress;GO:0042744//hydrogen peroxide catabolic process	K00430//peroxidase [EC:1.11.1.7]	NA	-1.584	gene
104903374	secretory carrier-associated membrane protein 1	GO:0030658//transport vesicle membrane;GO:0016021//integral component of membrane;GO:0005886//plasma membrane	NA	GO:0015031//protein transport	K19995//secretory carrier-associated membrane protein	NA	3.513	gene
104903364	protein STRUBBELIG-RECEPTOR FAMILY 3-like	GO:0016021//integral component of membrane	GO:0005524//ATP binding;GO:0004672//protein kinase activity	NA	K04733//interleukin-1 receptor-associated kinase 4 [EC:2.7.11.1]	NA	2.584	gene
104903360	nascent polypeptide-associated complex subunit alpha-like protein 4	GO:0005854//nascent polypeptide-associated complex	NA	NA	K03626//nascent polypeptide-associated complex subunit alpha	2.715	NA	promoter
104903354	protochlorophyllide reductase-like	GO:0009507//chloroplast	GO:0016630//protochlorophyllide reductase activity	GO:0015979//photosynthesis;GO:0015995//chlorophyll biosynthetic process	K00218	2.215	NA	promoter
104903345	peptidyl-prolyl cis-trans isomerase CYP20-1-like	#N/A	GO:0003755//peptidyl-prolyl cis-trans isomerase activity	GO:0006457//protein folding	K01802//peptidylprolyl isomerase [EC:5.2.1.8]	3.181	4.255	both
104903340	traB domain-containing protein-like	GO:0016021//integral component of membrane	NA	NA	NA	NA	2.174	gene
104903339	proteasome subunit alpha type-3	GO:0019773//proteasome core complex, alpha-subunit complex;GO:0005634//nucleus;GO:0005737//cytoplasm	GO:0004298//threonine-type endopeptidase activity	GO:0006511//ubiquitin-dependent protein catabolic process	K02727//20S proteasome subunit alpha 7 [EC:3.4.25.1]	NA	3.512	gene
104903338	DNA repair protein RAD16	#N/A	GO:0005524//ATP binding	NA	K15083//DNA repair protein RAD16	NA	3.578	gene
104903336	peroxisome biogenesis protein 22	GO:0016021//integral component of membrane	NA	GO:0007031//peroxisome organization	NA	NA	-3.395	gene
104903322	probable galacturonosyltransferase 10	GO:0016021//integral component of membrane;GO:0000139//Golgi membrane	GO:0047262//polygalacturonate 4-alpha-galacturonosyltransferase activity	GO:0045489//pectin biosynthetic process;GO:0071555//cell wall organization	K13648//alpha-1,4-galacturonosyltransferase [EC:2.4.1.43]	NA	-1.818	gene
104903317	transmembrane protein 97	GO:0016021//integral component of membrane	NA	NA	NA	NA	2.357	gene
104903272	exonuclease V, chloroplastic	#N/A	GO:0045735//nutrient reservoir activity	NA	K17815//exonuclease V [EC:3.1.-.-]	NA	4.724	gene
104903269	protein disulfide-isomerase 5-1	NA	GO:0016853//isomerase activity	GO:0045454//cell redox homeostasis	K13984//thioredoxin domain-containing protein 5	NA	2.597	gene
104903268	E3 SUMO-protein ligase SIZ1	GO:0005634//nucleus	GO:0008270//zinc ion binding;GO:0019789//SUMO transferase activity	NA	K22403//zinc finger MIZ domain-containing protein	NA	-2.999	gene
104903261	isovaleryl-CoA dehydrogenase, mitochondrial	GO:0005759//mitochondrial matrix	GO:0005524//ATP binding;GO:0050660//flavin adenine dinucleotide binding;GO:0008470//isovaleryl-CoA dehydrogenase activity;GO:0003995//acyl-CoA dehydrogenase activity	GO:0006552//leucine catabolic process	K00253//isovaleryl-CoA dehydrogenase [EC:1.3.8.4]	NA	1.096	gene
104903259	gamma-soluble NSF attachment protein	#N/A	NA	GO:0006886//intracellular protein transport	K21198//gamma-soluble NSF attachment protein	NA	3.493	gene
104903251	pyridoxal biosynthesis protein PDX2	#N/A	GO:0004359//glutaminase activity	GO:0042823//pyridoxal phosphate biosynthetic process	K08681//5'-phosphate synthase pdxT subunit [EC:4.3.3.6]	NA	-1.856	gene
104903250	zinc finger CCCH domain-containing protein 24	#N/A	GO:0003723//RNA binding;GO:0046872//metal ion binding;GO:0008173//RNA methyltransferase activity	GO:0006396//RNA processing	K15332//tRNA (uracil-5-)-methyltransferase [EC:2.1.1.-]	NA	2.943	gene
104903246	ABC transporter A family member 7-like	GO:0016021//integral component of membrane	GO:0005524//ATP binding;GO:0042626//ATPase-coupled transmembrane transporter activity;GO:0016887//ATPase activity	NA	K05643//ATP-binding cassette, subfamily A (ABC1), member 3	NA	2.368	gene
104903229	serine/threonine-protein phosphatase 6 regulatory subunit 3	#N/A	GO:0019903//protein phosphatase binding	GO:0043666//regulation of phosphoprotein phosphatase activity	K15501//serine/threonine-protein phosphatase 6 regulatory subunit 3	NA	4.728	gene
104903216	serine/arginine-rich splicing factor SR34A-like	NA	GO:0003723//RNA binding	NA	K12890//splicing factor, arginine/serine-rich 1	NA	-1.419	gene
104903202	em-like protein GEA6	GO:0005829//cytosol	NA	GO:0009737//response to abscisic acid	NA	18.893	NA	promoter
104903148	60S acidic ribosomal protein P1	GO:0005840//ribosome	GO:0003735//structural constituent of ribosome	GO:0006414//translational elongation	K02942//large subunit ribosomal protein LP1	-1.419	NA	promoter
104903132	ribosome-inactivating protein lychnin-like	#N/A	GO:0030598//rRNA N-glycosylase activity;GO:0090729//toxin activity	GO:0017148//negative regulation of translation;GO:0006952//defense response	NA	1.195	NA	promoter
104903126	exosome complex component RRP4	GO:0000178//exosome (RNase complex)	GO:0003723//RNA binding	NA	K03679//exosome complex component RRP4	NA	1.399	gene
104903117	probable phytol kinase 2, chloroplastic	GO:0016021//integral component of membrane	NA	NA	K15892	NA	2.487	gene
104903114	6-phosphofructo-2-kinase/fructose-2,6-bisphosphatase	#N/A	GO:2001070//starch binding;GO:0004331//fructose-2,6-bisphosphate 2-phosphatase activity;GO:0005524//ATP binding;GO:0003873//6-phosphofructo-2-kinase activity	GO:0006003//fructose 2,6-bisphosphate metabolic process;GO:0006000//fructose metabolic process	K01103//6-phosphofructo-2-kinase / fructose-2,6-biphosphatase 3 [EC:2.7.1.105 3.1.3.46]	NA	3.027	gene
104903098	protein FAR1-RELATED SEQUENCE 11-like	#N/A	GO:0008270//zinc ion binding	GO:0006355//regulation of transcription, DNA-templated	K17604//zinc finger SWIM domain-containing protein 3	1.42	NA	promoter
104903082	ABSCISIC ACID-INSENSITIVE 5-like protein 6	#N/A	GO:0003700//DNA-binding transcription factor activity	NA	K14432//ABA responsive element binding factor	NA	-3.336	gene
104903075	ETHYLENE INSENSITIVE 3-like 1 protein	GO:0005634//nucleus	GO:0003677//DNA binding;GO:0003700//DNA-binding transcription factor activity	NA	K14514//ethylene-insensitive protein 3	NA	-1.041	gene
104903074	la-related protein 1A	#N/A	GO:0003723//RNA binding	NA	K18757//la-related protein 1	NA	4.876	gene
104903073	subtilisin-like protease SBT5.3	GO:0005615//extracellular space	GO:0004252//serine-type endopeptidase activity	NA	K12619//5'-3' exoribonuclease 2 [EC:3.1.13.-];K13199//plasminogen activator inhibitor 1 RNA-binding protein;K15333//tRNA guanosine-2'-O-methyltransferase [EC:2.1.1.34];K14568//rRNA small subunit pseudouridine methyltransferase Nep1 [EC:2.1.1.260]	NA	-1.181	gene
104903072	flowering time control protein FPA	#N/A	GO:0003723//RNA binding	NA	K13201//nucleolysin TIA-1/TIAR;K13190//RNA-binding protein 15	NA	2.968	gene
104903062	auxin transporter-like protein 3	GO:0016021//integral component of membrane	NA	NA	K13946//auxin influx carrier (AUX1 LAX family)	NA	1.831	gene
104903042	calcium-binding protein PBP1-like	#N/A	GO:0005509//calcium ion binding	NA	K16465//centrin-1;K10840//centrin-2	1.732	NA	promoter
104903035	diacylglycerol kinase 5	#N/A	GO:0004143//diacylglycerol kinase activity;GO:0003951//NAD+ kinase activity;GO:0005524//ATP binding	GO:0007205//protein kinase C-activating G protein-coupled receptor signaling pathway;GO:0006952//defense response	K00901//diacylglycerol kinase (ATP) [EC:2.7.1.107]	NA	3.351	gene
104903032	inactive leucine-rich repeat receptor-like serine/threonine-protein kinase At1g60630	GO:0016021//integral component of membrane	GO:0005524//ATP binding;GO:0004672//protein kinase activity	NA	K04733//interleukin-1 receptor-associated kinase 4 [EC:2.7.11.1]	1.674	NA	promoter
104903031	N-alpha-acetyltransferase 11	NA	GO:0008080//N-acetyltransferase activity	GO:0006474//N-terminal protein amino acid acetylation	NA	NA	1.075	gene
104903025	E3 ubiquitin-protein ligase RMA1H1	NA	GO:0046872//metal ion binding	NA	K10666//E3 ubiquitin-protein ligase RNF5 [EC:2.3.2.27]	NA	1.775	gene
104903011	mediator of RNA polymerase II transcription subunit 31-like	GO:0016592//mediator complex	GO:0003712//transcription coregulator activity	GO:0006355//regulation of transcription, DNA-templated	K15153//mediator of RNA polymerase II transcription subunit 31	NA	-3.18	gene
104903009	nuclear transcription factor Y subunit B-3	GO:0005634//nucleus	GO:0043565//sequence-specific DNA binding;GO:0046982//protein heterodimerization activity	GO:0006355//regulation of transcription, DNA-templated	K08065//nuclear transcription Y subunit beta	1.103	NA	promoter
104903001	phytochrome C	GO:0005634//nucleus	GO:0042803//protein homodimerization activity;GO:0009881//photoreceptor activity	GO:0009585//red, far-red light phototransduction;GO:0017006//protein-tetrapyrrole linkage;GO:0006355//regulation of transcription, DNA-templated;GO:0009584//detection of visible light;GO:0018298//protein-chromophore linkage	K12120//phytochrome A	NA	2.067	gene
104902995	glucose-6-phosphate 1-dehydrogenase, chloroplastic	GO:0009507//chloroplast;GO:0009570//chloroplast stroma	GO:0050661//NADP binding;GO:0004345//glucose-6-phosphate dehydrogenase activity	GO:0006006//glucose metabolic process;GO:0006098//pentose-phosphate shunt;GO:0009051//pentose-phosphate shunt, oxidative branch	K00036//glucose-6-phosphate 1-dehydrogenase [EC:1.1.1.49 1.1.1.363]	NA	-2.216	gene
104902969	acetyl-CoA acetyltransferase, cytosolic 1	GO:0005829//cytosol;GO:0005777//peroxisome;GO:0005886//plasma membrane	GO:0003985//acetyl-CoA C-acetyltransferase activity;GO:0016747//transferase activity, transferring acyl groups other than amino-acyl groups	GO:0009846//pollen germination;GO:0016125//sterol metabolic process;GO:0009860//pollen tube growth	K00626//acetyl-CoA C-acetyltransferase [EC:2.3.1.9]	-0.05	-2.199	both
104902965	ribulose-1,5 bisphosphate carboxylase/oxygenase large subunit N-methyltransferase, chloroplastic	GO:0009507//chloroplast	GO:0030785//[ribulose-bisphosphate carboxylase]-lysine N-methyltransferase activity	GO:0032259//methylation	K19199//histone-lysine N-methyltransferase SETD3 [EC:2.1.1.43]	NA	1.531	gene
104902956	serine/threonine-protein kinase HT1-like	#N/A	GO:0005524//ATP binding;GO:0004672//protein kinase activity	NA	K17535//serine/threonine-protein kinase TNNI3K [EC:2.7.11.1]	NA	-3.355	gene
104902951	glucan endo-1,3-beta-glucosidase 12	GO:0016021//integral component of membrane	NA	NA	K03006//DNA-directed RNA polymerase II subunit RPB1 [EC:2.7.7.6];K22832	-1.396	NA	promoter
104902907	metal transporter Nramp2-like	GO:0016021//integral component of membrane	GO:0046873//metal ion transmembrane transporter activity;GO:0005384//manganese ion transmembrane transporter activity;GO:0015086//cadmium ion transmembrane transporter activity	NA	K21398//natural resistance-associated macrophage protein 2	NA	-1.053	gene
104902894	serine carboxypeptidase-like	#N/A	GO:0004185//serine-type carboxypeptidase activity	NA	K16298//serine carboxypeptidase-like clade IV [EC:3.4.16.-]	NA	-1.352	gene
104902878	SNF1-related protein kinase regulatory subunit beta-3	#N/A	NA	GO:0009744//response to sucrose;GO:0043562//cellular response to nitrogen levels	K07199//5'-AMP-activated protein kinase, regulatory beta subunit	-3.163	-3.163	both
104902872	helicase protein MOM1-like	GO:0005634//nucleus	GO:0046872//metal ion binding;GO:0005524//ATP binding	NA	K11643//chromodomain-helicase-DNA-binding protein 4 [EC:3.6.4.12]	NA	5.708	gene
104902867	receptor-like serine/threonine-protein kinase NCRK	GO:0016021//integral component of membrane	GO:0005524//ATP binding;GO:0004672//protein kinase activity	NA	K04733//interleukin-1 receptor-associated kinase 4 [EC:2.7.11.1]	NA	3.529	gene
104902838	probable protein phosphatase 2C 39	#N/A	GO:0004722//protein serine/threonine phosphatase activity	NA	K17506//protein phosphatase 1L [EC:3.1.3.16]	NA	2.206	gene
104902824	switch 2	#N/A	GO:0005524//ATP binding	NA	K20098//DNA excision repair protein ERCC-6-like 2 [EC:3.6.4.-]	NA	4.543	gene
104902804	two pore calcium channel protein 1A	GO:0016021//integral component of membrane	GO:0005216//ion channel activity;GO:0005509//calcium ion binding	NA	K16900//two pore calcium channel protein, plant	NA	-1.006	gene
104902801	exopolygalacturonase-like	GO:0005576//extracellular region	GO:0004650//polygalacturonase activity	GO:0005975//carbohydrate metabolic process;GO:0071555//cell wall organization	K01213	0.434	2.572	both
104902793	cytochrome b561 and DOMON domain-containing protein At2g04850	GO:0016021//integral component of membrane	GO:0046872//metal ion binding	GO:0055114//oxidation-reduction process	NA	-1.189	NA	promoter
104902711	putative lysozyme-like protein	GO:0016021//integral component of membrane	NA	GO:0055085//transmembrane transport	K02184//formin 2	-2.073	-1.954	both
104902710	pentatricopeptide repeat-containing protein At3g16610	GO:0043231//intracellular membrane-bounded organelle	GO:0008270//zinc ion binding	GO:0009451//RNA modification	K22733//magnesium transporter	NA	1.023	gene
104902692	aspartate-semialdehyde dehydrogenase	NA	GO:0050661//NADP binding;GO:0051287//NAD binding;GO:0046983//protein dimerization activity;GO:0004073//aspartate-semialdehyde dehydrogenase activity	GO:0009089//lysine biosynthetic process via diaminopimelate;GO:0009088//threonine biosynthetic process;GO:0009097//isoleucine biosynthetic process;GO:0009086//methionine biosynthetic process	K00133//aspartate-semialdehyde dehydrogenase [EC:1.2.1.11]	NA	3.603	gene
104902691	50S ribosomal protein L23, chloroplastic-like	GO:0005840//ribosome;GO:0009507//chloroplast	GO:0003735//structural constituent of ribosome;GO:0019843//rRNA binding	GO:0006412//translation	K02893//large subunit ribosomal protein L23Ae	2.909	NA	promoter
104902663	transcription factor ALC-like	NA	GO:0046983//protein dimerization activity	NA	K16189;K04733//interleukin-1 receptor-associated kinase 4 [EC:2.7.11.1]	NA	1.487	gene
104902660	endoglucanase 5-like	NA	GO:0030246//carbohydrate binding;GO:0008810//cellulase activity	GO:0030245//cellulose catabolic process	K01179//endoglucanase [EC:3.2.1.4]	NA	1.302	gene
104902637	endoplasmic reticulum-Golgi intermediate compartment protein 3	GO:0030134//COPII-coated ER to Golgi transport vesicle;GO:0005783//endoplasmic reticulum;GO:0016021//integral component of membrane	NA	GO:0006890//retrograde vesicle-mediated transport, Golgi to endoplasmic reticulum;GO:0006888//endoplasmic reticulum to Golgi vesicle-mediated transport	K20367//endoplasmic reticulum-Golgi intermediate compartment protein 3	-0.106	4.231	both
104902610	delta(24)-sterol reductase	GO:0016020//membrane;GO:0016021//integral component of membrane;GO:0005737//cytoplasm	GO:0016628//oxidoreductase activity, acting on the CH-CH group of donors, NAD or NADP as acceptor;GO:0071949//FAD binding	GO:0008202//steroid metabolic process	K09828//Delta24-sterol reductase [EC:1.3.1.72 1.3.1.-]	-1.014	NA	promoter
104902607	anamorsin homolog	GO:0005758//mitochondrial intermembrane space	GO:0009055//electron transfer activity;GO:0046872//metal ion binding;GO:0051537//2 iron, 2 sulfur cluster binding;GO:0051539//4 iron, 4 sulfur cluster binding	GO:0016226//iron-sulfur cluster assembly	K22746//anamorsin	NA	-2.572	gene
104902597	L-aspartate oxidase, chloroplastic-like	GO:0009507//chloroplast	GO:0044318//L-aspartate:fumarate oxidoreductase activity;GO:0008734//L-aspartate oxidase activity	GO:0009435//NAD biosynthetic process	K00278	NA	2.248	gene
104902573	isocitrate dehydrogenase [NADP]	#N/A	GO:0000287//magnesium ion binding;GO:0004450//isocitrate dehydrogenase (NADP+) activity;GO:0051287//NAD binding	GO:0006099//tricarboxylic acid cycle;GO:0006102//isocitrate metabolic process	K00031//isocitrate dehydrogenase [EC:1.1.1.42]	NA	-3.217	gene
104902528	ribosome-inactivating protein PD-L1/PD-L2-like	#N/A	GO:0030598//rRNA N-glycosylase activity;GO:0090729//toxin activity	GO:0017148//negative regulation of translation;GO:0006952//defense response	NA	1.721	NA	promoter
104902524	probable inactive receptor kinase At5g67200	GO:0016021//integral component of membrane	GO:0005524//ATP binding;GO:0004672//protein kinase activity	NA	K04733//interleukin-1 receptor-associated kinase 4 [EC:2.7.11.1]	NA	20.072	gene
104902514	G patch domain and ankyrin repeat-containing protein 1 homolog	NA	GO:0003676//nucleic acid binding	NA	K03695//ATP-dependent Clp protease ATP-binding subunit ClpB	1.054	NA	promoter
104902509	katanin p80 WD40 repeat-containing subunit B1 homolog	GO:0008352//katanin complex;GO:0005874//microtubule;GO:0005737//cytoplasm	GO:0008017//microtubule binding	GO:0051013//microtubule severing	K18643//katanin p80 WD40 repeat-containing subunit B1	NA	1.203	gene
104902500	probable isoaspartyl peptidase/L-asparaginase 2	NA	GO:0016787//hydrolase activity	NA	K13051//beta-aspartyl-peptidase (threonine type) [EC:3.4.19.5]	NA	1.729	gene
104902478	indole-3-pyruvate monooxygenase YUCCA2-like	NA	GO:0050661//NADP binding;GO:0004499//N,N-dimethylaniline monooxygenase activity;GO:0050660//flavin adenine dinucleotide binding	NA	K11816//indole-3-pyruvate monooxygenase [EC:1.14.13.168]	NA	1.694	gene
104902472	mannose-P-dolichol utilization defect 1 protein homolog 2	GO:0016021//integral component of membrane	NA	NA	K09660//mannose-P-dolichol utilization defect 1	NA	-3.391	gene
104902468	ABC transporter G family member 38-like	GO:0016021//integral component of membrane;GO:0005886//plasma membrane	GO:0005524//ATP binding;GO:0004523//RNA-DNA hybrid ribonuclease activity;GO:0042626//ATPase-coupled transmembrane transporter activity;GO:0003676//nucleic acid binding;GO:0016887//ATPase activity	GO:0055085//transmembrane transport	K05681//ATP-binding cassette, subfamily G (WHITE), member 2	-1.835	NA	promoter
104902467	serine/threonine-protein kinase Aurora-3-like	NA	GO:0004674//protein serine/threonine kinase activity;GO:0005524//ATP binding;GO:0004672//protein kinase activity	GO:0000278//mitotic cell cycle;GO:0000226//microtubule cytoskeleton organization;GO:0007059//chromosome segregation;GO:0032465//regulation of cytokinesis	K08850	-1.717	NA	promoter
104902456	F-box protein CPR30-like	GO:0016021//integral component of membrane;GO:0005777//peroxisome	NA	GO:0010468//regulation of gene expression	K01534//Cd2+/Zn2+-exporting ATPase [EC:3.6.3.3 3.6.3.5]	NA	-1.205	gene
104902433	protein GLUTAMINE DUMPER 3	GO:0016021//integral component of membrane	NA	GO:0080143//regulation of amino acid export	K13128//zinc finger CCHC domain-containing protein 8	18.544	-1.16	both
104902411	auxin-responsive protein IAA33	GO:0005634//nucleus	NA	GO:0006355//regulation of transcription, DNA-templated;GO:0009734//auxin-activated signaling pathway	K14484//auxin-responsive protein IAA	NA	-1.466	gene
104902372	pumilio homolog 5	#N/A	GO:0003723//RNA binding	NA	K17943//pumilio RNA-binding family	NA	20.09	gene
104902354	putative clathrin assembly protein At5g57200	GO:0030136//clathrin-coated vesicle	GO:0030276//clathrin binding;GO:0005545//1-phosphatidylinositol binding	GO:0048268//clathrin coat assembly	K20044//phosphatidylinositol-binding clathrin assembly protein	NA	-1.712	gene
104902349	inositol oxygenase 4	GO:0005737//cytoplasm	GO:0005506//iron ion binding;GO:0050113//inositol oxygenase activity	GO:0019310//inositol catabolic process	K00469//inositol oxygenase [EC:1.13.99.1]	NA	1.04	gene
104902345	ABC transporter B family member 11-like	GO:0016021//integral component of membrane	GO:0005524//ATP binding;GO:0042626//ATPase-coupled transmembrane transporter activity;GO:0016887//ATPase activity	NA	K05658//ATP-binding cassette, subfamily B (MDR/TAP), member 1 [EC:7.6.2.2]	-1.38	NA	promoter
104902340	ATP-dependent 6-phosphofructokinase 6	GO:0005737//cytoplasm	GO:0046872//metal ion binding;GO:0003872//6-phosphofructokinase activity;GO:0005524//ATP binding	GO:0006002//fructose 6-phosphate metabolic process	K00850//6-phosphofructokinase 1 [EC:2.7.1.11]	1.057	NA	promoter
104902335	subtilisin-like protease	NA	GO:0004252//serine-type endopeptidase activity	NA	K12619//5'-3' exoribonuclease 2 [EC:3.1.13.-];K13199//plasminogen activator inhibitor 1 RNA-binding protein;K15333//tRNA guanosine-2'-O-methyltransferase [EC:2.1.1.34];K14568//rRNA small subunit pseudouridine methyltransferase Nep1 [EC:2.1.1.260]	1.001	NA	promoter
104902315	probable pectinesterase 53	#N/A	GO:0045330//aspartyl esterase activity;GO:0030599//pectinesterase activity	GO:0045490//pectin catabolic process;GO:0042545//cell wall modification	K01051//pectinesterase [EC:3.1.1.11]	NA	-2.129	gene
104902295	putative ABC transporter B family member 8	GO:0016021//integral component of membrane	GO:0005524//ATP binding;GO:0042626//ATPase-coupled transmembrane transporter activity;GO:0016887//ATPase activity	NA	K05658//ATP-binding cassette, subfamily B (MDR/TAP), member 1 [EC:7.6.2.2]	NA	-2.389	gene
104902284	probable RNA-dependent RNA polymerase 3	#N/A	GO:0004471//malate dehydrogenase (decarboxylating) (NAD+) activity;GO:0046872//metal ion binding;GO:0051287//NAD binding;GO:0003968//RNA-directed 5'-3' RNA polymerase activity	NA	K11699//RNA-dependent RNA polymerase [EC:2.7.7.48]	-2.483	NA	promoter
104902283	probable RNA-dependent RNA polymerase 3	#N/A	GO:0003723//RNA binding;GO:0003968//RNA-directed 5'-3' RNA polymerase activity	GO:0031047//gene silencing by RNA	K11699//RNA-dependent RNA polymerase [EC:2.7.7.48]	-3.272	0.009	both
104902273	dolichyl-diphosphooligosaccharide--protein glycosyltransferase subunit STT3A	GO:0016021//integral component of membrane	GO:0004576//oligosaccharyl transferase activity	GO:0006486//protein glycosylation	K07151//dolichyl-diphosphooligosaccharide---protein glycosyltransferase [EC:2.4.99.18]	NA	1.579	gene
104902271	ethylene-responsive transcription factor ERF043	GO:0005634//nucleus	GO:0003677//DNA binding;GO:0003700//DNA-binding transcription factor activity	NA	K09286//EREBP-like factor	1.442	NA	promoter
104902228	aspartate aminotransferase, cytoplasmic-like	NA	GO:0004069//L-aspartate:2-oxoglutarate aminotransferase activity;GO:0030170//pyridoxal phosphate binding	GO:0009058//biosynthetic process;GO:0006520//cellular amino acid metabolic process	K14454//aspartate aminotransferase, cytoplasmic [EC:2.6.1.1]	NA	1.784	gene
104902207	proline-rich receptor-like protein kinase PERK1	GO:0016021//integral component of membrane;GO:0005886//plasma membrane	GO:0005524//ATP binding;GO:0004672//protein kinase activity;GO:0004675//transmembrane receptor protein serine/threonine kinase activity	GO:0006468//protein phosphorylation	K04733//interleukin-1 receptor-associated kinase 4 [EC:2.7.11.1];K04730//interleukin-1 receptor-associated kinase 1 [EC:2.7.11.1]	-5.642	-3.872	both
104902201	polyol transporter 5-like	GO:0016021//integral component of membrane	GO:0022857//transmembrane transporter activity	NA	K08150//MFS transporter, SP family, solute carrier family 2 (myo-inositol transporter), member 13	0.849	-3.843	both
104902182	phosphoribosylaminoimidazole carboxylase, chloroplastic-like	#N/A	GO:0046872//metal ion binding;GO:0005524//ATP binding;GO:0004638//phosphoribosylaminoimidazole carboxylase activity	GO:0006189//'de novo' IMP biosynthetic process	K11808	NA	-1.085	gene
104902163	fe-S cluster assembly factor HCF101, chloroplastic	#N/A	GO:0005524//ATP binding	NA	K03593//ATP-binding protein involved in chromosome partitioning	2.176	NA	promoter
104902156	3-hydroxyisobutyryl-CoA hydrolase-like protein 3, mitochondrial	#N/A	GO:0003860//3-hydroxyisobutyryl-CoA hydrolase activity	NA	K05605//3-hydroxyisobutyryl-CoA hydrolase [EC:3.1.2.4]	-1.382	NA	promoter
104902138	protein yippee-like At3g08990	#N/A	GO:0046872//metal ion binding	NA	NA	NA	2.305	gene
104902128	sodium/pyruvate cotransporter BASS2, chloroplastic	GO:0016021//integral component of membrane	NA	NA	K03453	1.042	NA	promoter
104902127	far upstream element-binding protein 1-like	NA	GO:0003723//RNA binding	NA	K13210//far upstream element-binding protein	NA	-1.244	gene
104902126	probable inactive receptor kinase At2g26730	GO:0016021//integral component of membrane	GO:0005524//ATP binding;GO:0004672//protein kinase activity	NA	K04733//interleukin-1 receptor-associated kinase 4 [EC:2.7.11.1]	-1.008	NA	promoter
104902112	transportin-1	GO:0005634//nucleus	GO:0008536//Ran GTPase binding	GO:0006606//protein import into nucleus	K18752//transportin-1	NA	-2.176	gene
104902059	DEAD-box ATP-dependent RNA helicase 37-like	#N/A	GO:0005524//ATP binding;GO:0003676//nucleic acid binding	NA	K11594//ATP-dependent RNA helicase DDX3X [EC:3.6.4.13]	NA	2.505	gene
104902044	nuclear pore complex protein NUP205	GO:0005643//nuclear pore;GO:0044611//nuclear pore inner ring	GO:0017056//structural constituent of nuclear pore	GO:0006999//nuclear pore organization	K14310//nuclear pore complex protein Nup205	-2.794	NA	promoter
104902023	CBL-interacting serine/threonine-protein kinase 24	#N/A	GO:0004674//protein serine/threonine kinase activity;GO:0005524//ATP binding	GO:0007165//signal transduction	K07198//5'-AMP-activated protein kinase, catalytic alpha subunit [EC:2.7.11.11]	2.019	NA	promoter
104901967	caffeic acid 3-O-methyltransferase-like	#N/A	GO:0008171//O-methyltransferase activity;GO:0046983//protein dimerization activity	GO:0032259//methylation	K13066//caffeic acid 3-O-methyltransferase [EC:2.1.1.68]	NA	1.596	gene
104901963	LIM domain-containing protein WLIM1	NA	GO:0046872//metal ion binding	NA	K09377//cysteine and glycine-rich protein	NA	1.197	gene
104901952	probable 3-beta-hydroxysteroid-Delta(8),Delta(7)-isomerase	GO:0016021//integral component of membrane	GO:0047750//cholestenol delta-isomerase activity	GO:0016125//sterol metabolic process	K01824//cholestenol Delta-isomerase [EC:5.3.3.5]	NA	1.453	gene
104901934	codeine O-demethylase-like	#N/A	GO:0046872//metal ion binding;GO:0051213//dioxygenase activity;GO:0016491//oxidoreductase activity	NA	K05278//flavonol synthase [EC:1.14.20.6];K05658//ATP-binding cassette, subfamily B (MDR/TAP), member 1 [EC:7.6.2.2]	2.535	NA	promoter
104901933	protein SRG1-like	#N/A	GO:0046872//metal ion binding;GO:0016491//oxidoreductase activity	NA	K05278//flavonol synthase [EC:1.14.20.6];K05658//ATP-binding cassette, subfamily B (MDR/TAP), member 1 [EC:7.6.2.2]	NA	3.83	gene
104901931	protein SRG1-like	#N/A	GO:0046872//metal ion binding;GO:0016491//oxidoreductase activity	NA	K05278//flavonol synthase [EC:1.14.20.6];K05658//ATP-binding cassette, subfamily B (MDR/TAP), member 1 [EC:7.6.2.2]	-1.232	NA	promoter
104901929	protein SRG1-like	#N/A	GO:0046872//metal ion binding;GO:0016491//oxidoreductase activity	NA	K05278//flavonol synthase [EC:1.14.20.6]	NA	-1.686	gene
104901925	protein SRG1-like	#N/A	GO:0046872//metal ion binding;GO:0016491//oxidoreductase activity	NA	K05278//flavonol synthase [EC:1.14.20.6];K05658//ATP-binding cassette, subfamily B (MDR/TAP), member 1 [EC:7.6.2.2]	NA	1.999	gene
104901911	leucine-rich repeat receptor-like serine/threonine-protein kinase BAM1	GO:0016021//integral component of membrane	GO:0005524//ATP binding;GO:0004672//protein kinase activity	NA	K00924	NA	-1.024	gene
104901906	protein S-acyltransferase 24	GO:0005768//endosome;GO:0016021//integral component of membrane;GO:0005802//trans-Golgi network	GO:0000035//acyl binding;GO:0019706//protein-cysteine S-palmitoyltransferase activity	GO:0009932//cell tip growth	K20032//palmitoyltransferase ZDHHC13/17 [EC:2.3.1.225]	NA	-2.309	gene
104901898	putative UPF0481 protein At3g02645	GO:0016021//integral component of membrane	NA	NA	K01193//beta-fructofuranosidase [EC:3.2.1.26]	1.346	NA	promoter
104901894	probable L-type lectin-domain containing receptor kinase S.5	GO:0016021//integral component of membrane;GO:0005886//plasma membrane	GO:0030246//carbohydrate binding;GO:0005524//ATP binding;GO:0004672//protein kinase activity	NA	K04733//interleukin-1 receptor-associated kinase 4 [EC:2.7.11.1]	-1.185	-1.118	both
104901881	caffeic acid 3-O-methyltransferase-like	#N/A	GO:0008171//O-methyltransferase activity;GO:0046983//protein dimerization activity	GO:0032259//methylation	K13066//caffeic acid 3-O-methyltransferase [EC:2.1.1.68]	3.355	NA	promoter
104901872	proline-rich receptor-like protein kinase PERK15	GO:0016021//integral component of membrane	GO:0005524//ATP binding;GO:0004672//protein kinase activity	NA	K04733//interleukin-1 receptor-associated kinase 4 [EC:2.7.11.1]	NA	-2.426	gene
104901858	probable flavin-containing monooxygenase 1	#N/A	GO:0050661//NADP binding;GO:0004499//N,N-dimethylaniline monooxygenase activity;GO:0050660//flavin adenine dinucleotide binding	NA	K00485//dimethylaniline monooxygenase (N-oxide forming) [EC:1.14.13.8]	-19.827	NA	promoter
104901837	reticuline oxidase-like protein	#N/A	GO:0016491//oxidoreductase activity;GO:0071949//FAD binding	NA	K22395//cinnamyl-alcohol dehydrogenase [EC:1.1.1.195]	NA	2.042	gene
104901829	transmembrane 9 superfamily member 11	GO:0016021//integral component of membrane	NA	NA	K17086//transmembrane 9 superfamily member 2/4	3.76	NA	promoter
104901827	adenylate kinase 5, chloroplastic	#N/A	GO:0005524//ATP binding;GO:0004017//adenylate kinase activity	NA	K00939//adenylate kinase [EC:2.7.4.3]	3.223	0.066	both
104901824	protein ENHANCED DISEASE RESISTANCE 2-like	#N/A	GO:0008289//lipid binding	NA	NA	NA	2.923	gene
104901823	dicer-like protein 4	NA	GO:0003723//RNA binding;GO:0004525//ribonuclease III activity;GO:0005524//ATP binding	GO:0006396//RNA processing	K11592//endoribonuclease Dicer [EC:3.1.26.-]	NA	1.209	gene
104901818	glutathione S-transferase omega-like 2	#N/A	GO:0004364//glutathione transferase activity	NA	K07393//glutathionyl-hydroquinone reductase [EC:1.8.5.7]	1.819	NA	promoter
104901809	60S ribosomal protein L39-3	GO:0005840//ribosome	GO:0003735//structural constituent of ribosome	GO:0006412//translation	K02924//large subunit ribosomal protein L39e	NA	-2.577	gene
104901800	leucine aminopeptidase 1-like	GO:0005737//cytoplasm	GO:0004177//aminopeptidase activity;GO:0008235//metalloexopeptidase activity;GO:0030145//manganese ion binding	NA	K01255//leucyl aminopeptidase [EC:3.4.11.1]	2.293	NA	promoter
104901781	protein ECERIFERUM 3	GO:0016021//integral component of membrane	GO:0005506//iron ion binding;GO:0016491//oxidoreductase activity	GO:0008610//lipid biosynthetic process	K15404	NA	18.605	gene
104901777	tetraspanin-8-like	GO:0016021//integral component of membrane	NA	NA	K01184//polygalacturonase [EC:3.2.1.15];K17345//tetraspanin-5;K17356//tetraspanin-13/31	1.081	NA	promoter
104901775	cyclin-dependent kinase C-2-like	#N/A	GO:0005524//ATP binding;GO:0004672//protein kinase activity	NA	K08819//cyclin-dependent kinase 12/13 [EC:2.7.11.22 2.7.11.23]	2.153	NA	promoter
104901761	kinesin-related protein 11	GO:0005874//microtubule	GO:0005524//ATP binding;GO:0003777//microtubule motor activity;GO:0008017//microtubule binding	GO:0007018//microtubule-based movement	K11498//centromeric protein E	NA	-1.612	gene
104901748	histone-lysine N-methyltransferase ASHR3	GO:0005634//nucleus	GO:0018024//histone-lysine N-methyltransferase activity	NA	K11423//histone-lysine N-methyltransferase SETD2 [EC:2.1.1.43]	3.459	NA	promoter
104901734	putative leucine-rich repeat receptor-like serine/threonine-protein kinase At2g24130	GO:0016021//integral component of membrane	GO:0004674//protein serine/threonine kinase activity;GO:0005524//ATP binding	NA	K13428;K13437	NA	1.036	gene
104901731	serine/threonine-protein kinase ULK4-like	NA	GO:0005524//ATP binding;GO:0004672//protein kinase activity	NA	K17545//serine/threonine-protein kinase ULK4 [EC:2.7.11.1]	-0.386	2.722	both
104901699	pectinesterase/pectinesterase inhibitor PPE8B-like	#N/A	GO:0045330//aspartyl esterase activity;GO:0004857//enzyme inhibitor activity;GO:0030599//pectinesterase activity	GO:0045490//pectin catabolic process;GO:0042545//cell wall modification	K01051//pectinesterase [EC:3.1.1.11]	NA	4.026	gene
104901688	phosphoinositide phosphatase SAC3	GO:0016021//integral component of membrane	GO:0042578//phosphoric ester hydrolase activity	NA	K22913//phosphatidylinositol 3,5-bisphosphate 5-phosphatase [EC:3.1.3.-]	NA	-2.69	gene
104901675	sucrose synthase	NA	GO:0016157//sucrose synthase activity	GO:0009877//nodulation;GO:0005985//sucrose metabolic process	K00695//sucrose synthase [EC:2.4.1.13]	NA	2.271	gene
104901668	cytochrome P450 76C4-like	NA	GO:0016705//oxidoreductase activity, acting on paired donors, with incorporation or reduction of molecular oxygen;GO:0020037//heme binding;GO:0005506//iron ion binding;GO:0004497//monooxygenase activity	NA	K20556	-1.247	-1.247	both
104901656	oligouridylate-binding protein 1-like	#N/A	GO:0003723//RNA binding	NA	K13201//nucleolysin TIA-1/TIAR	NA	1.114	gene
104901648	ethylene-responsive transcription factor ERF017-like	GO:0005634//nucleus	GO:0003677//DNA binding;GO:0003700//DNA-binding transcription factor activity	NA	K09286//EREBP-like factor	-1.701	NA	promoter
104901643	DEAD-box ATP-dependent RNA helicase 17	#N/A	GO:0003723//RNA binding;GO:0005524//ATP binding;GO:0003724//RNA helicase activity	NA	K14806//ATP-dependent RNA helicase DDX31/DBP7 [EC:3.6.4.13]	NA	-3.21	gene
104901639	choline/ethanolaminephosphotransferase 1-like	GO:0016021//integral component of membrane	GO:0016780//phosphotransferase activity, for other substituted phosphate groups	GO:0008654//phospholipid biosynthetic process	K00993//ethanolaminephosphotransferase [EC:2.7.8.1]	NA	3.602	gene
104901638	3-oxoacyl-[acyl-carrier-protein] synthase II, chloroplastic	NA	GO:0016747//transferase activity, transferring acyl groups other than amino-acyl groups	GO:0006633//fatty acid biosynthetic process	K09458//3-oxoacyl-[acyl-carrier-protein] synthase II [EC:2.3.1.179]	NA	-1.289	gene
104901616	tristetraprolin-like	NA	GO:0046872//metal ion binding	NA	K18753//butyrate response factor;K15308//tristetraprolin	NA	1.959	gene
104901609	PXMP2/4 family protein 4-like	GO:0016021//integral component of membrane	NA	NA	K13348//protein Mpv17	NA	-1.542	gene
104901607	histone deacetylase 6	NA	GO:0008270//zinc ion binding	NA	K19476//vacuolar protein sorting-associated protein IST1;K11121	NA	-1.788	gene
104901583	sulfate transporter 1.2-like	GO:0005887//integral component of plasma membrane;GO:0016021//integral component of membrane	GO:0015301//anion:anion antiporter activity;GO:0008271//secondary active sulfate transmembrane transporter activity	NA	K17470//sulfate transporter 1, high-affinity	NA	5.071	gene
104901581	dnaJ homolog subfamily C GRV2	GO:0010008//endosome membrane	NA	GO:0006898//receptor-mediated endocytosis	K09533//DnaJ homolog subfamily C member 13	NA	-6.006	gene
104901578	beta-xylosidase/alpha-L-arabinofuranosidase 2-like	GO:0009505//plant-type cell wall	GO:0046556//alpha-L-arabinofuranosidase activity;GO:0004553//hydrolase activity, hydrolyzing O-glycosyl compounds;GO:0009044//xylan 1,4-beta-xylosidase activity	GO:0045493//xylan catabolic process;GO:0005975//carbohydrate metabolic process;GO:0031222//arabinan catabolic process	K15920//xylan 1,4-beta-xylosidase [EC:3.2.1.37]	NA	-2.141	gene
104901575	dynamin-like protein ARC5	#N/A	GO:0005525//GTP binding;GO:0003924//GTPase activity	NA	K01528//dynamin GTPase [EC:3.6.5.5];K17065//dynamin 1-like protein [EC:3.6.5.5]	NA	1.679	gene
104901567	allene oxide synthase, chloroplastic	#N/A	GO:0016705//oxidoreductase activity, acting on paired donors, with incorporation or reduction of molecular oxygen;GO:0016829//lyase activity;GO:0020037//heme binding;GO:0005506//iron ion binding;GO:0004497//monooxygenase activity	NA	K10528//hydroperoxide lyase [EC:4.1.2.-]	NA	1.07	gene
104901563	endochitinase A-like	#N/A	GO:0008061//chitin binding;GO:0004568//chitinase activity	GO:0006032//chitin catabolic process;GO:0016998//cell wall macromolecule catabolic process;GO:0005975//carbohydrate metabolic process	K01183//chitinase [EC:3.2.1.14]	NA	3.656	gene
104901553	probable acyl-[acyl-carrier-protein]--UDP-N-acetylglucosamine O-acyltransferase, mitochondrial	NA	GO:0008780//acyl-[acyl-carrier-protein]-UDP-N-acetylglucosamine O-acyltransferase activity	GO:0008610//lipid biosynthetic process	K00677	NA	2.41	gene
104901545	nucleolar and coiled-body phosphoprotein 1	GO:0005730//nucleolus	NA	NA	K18626//trichohyalin	-0.407	-2.201	both
104901544	calcium-transporting ATPase 10, plasma membrane-type	GO:0043231//intracellular membrane-bounded organelle;GO:0016021//integral component of membrane	GO:0005524//ATP binding;GO:0005388//calcium transmembrane transporter activity, phosphorylative mechanism;GO:0019829//ATPase-coupled cation transmembrane transporter activity;GO:0005516//calmodulin binding	NA	K01537//Ca2+-transporting ATPase [EC:3.6.3.8]	NA	-3.632	gene
104901536	transcription factor bHLH84-like	GO:0005634//nucleus	GO:0001228//DNA-binding transcription activator activity, RNA polymerase II-specific;GO:0046983//protein dimerization activity	GO:0009555//pollen development	K04733//interleukin-1 receptor-associated kinase 4 [EC:2.7.11.1];K16189;K12126	NA	-2.133	gene
104901470	fatty acyl-CoA reductase 3-like	GO:0016021//integral component of membrane	GO:0080019//fatty-acyl-CoA reductase (alcohol-forming) activity;GO:0102965//alcohol-forming fatty acyl-CoA reductase activity	GO:0006629//lipid metabolic process	K13356//alcohol-forming fatty acyl-CoA reductase [EC:1.2.1.84]	NA	-1.934	gene
104901469	BTB/POZ domain-containing protein NPY2	NA	NA	GO:0009958//positive gravitropism	NA	NA	1.791	gene
104901468	vacuolar-sorting receptor 4-like	GO:0016021//integral component of membrane	GO:0005509//calcium ion binding	NA	K04733//interleukin-1 receptor-associated kinase 4 [EC:2.7.11.1];K01859;K08065//nuclear transcription Y subunit beta	NA	3.295	gene
104901465	zinc finger protein-like 1 homolog	GO:0016021//integral component of membrane	NA	NA	NA	NA	2.783	gene
104901462	zinc finger protein ZAT10-like	NA	GO:0003676//nucleic acid binding	NA	K22534//PR domain zinc finger protein 5;K05747//Wiskott-Aldrich syndrome protein	1.225	NA	promoter
104901460	proline synthase co-transcribed bacterial homolog protein-like	NA	GO:0030170//pyridoxal phosphate binding	NA	K06997//PLP dependent protein	NA	-1.013	gene
104901458	probable beta-D-xylosidase 5	NA	GO:0004553//hydrolase activity, hydrolyzing O-glycosyl compounds	GO:0005975//carbohydrate metabolic process	K15920//xylan 1,4-beta-xylosidase [EC:3.2.1.37]	NA	2.782	gene
104901442	superkiller viralicidic activity 2-like 2	NA	GO:0003723//RNA binding;GO:0005524//ATP binding;GO:0003724//RNA helicase activity	GO:0006401//RNA catabolic process	K12598//ATP-dependent RNA helicase DOB1 [EC:3.6.4.13]	-1.456	-3.363	both
104901439	tRNA (guanine(9)-N1)-methyltransferase	#N/A	GO:0008168//methyltransferase activity	NA	K15445//tRNA (guanine9-N1)-methyltransferase [EC:2.1.1.221]	NA	3.075	gene
104901438	clathrin heavy chain 2-like	GO:0030132//clathrin coat of coated pit;GO:0030130//clathrin coat of trans-Golgi network vesicle;GO:0071439//clathrin complex	GO:0005198//structural molecule activity;GO:0032051//clathrin light chain binding	GO:0006886//intracellular protein transport;GO:0016192//vesicle-mediated transport	K04646//clathrin heavy chain	NA	1.063	gene
104901437	beta-galactosidase 3-like	#N/A	GO:0030246//carbohydrate binding;GO:0004565//beta-galactosidase activity	GO:0005975//carbohydrate metabolic process	K12309//beta-galactosidase [EC:3.2.1.23]	NA	2.544	gene
104901434	elongation factor G-1, mitochondrial-like	GO:0005739//mitochondrion	GO:0003746//translation elongation factor activity;GO:0005525//GTP binding;GO:0003924//GTPase activity	GO:0070125//mitochondrial translational elongation	K02355//elongation factor G	NA	1.164	gene
104901432	nudix hydrolase 3	GO:0005737//cytoplasm	GO:0016787//hydrolase activity;GO:0008239//dipeptidyl-peptidase activity	NA	NA	NA	1.163	gene
104901428	serine/threonine-protein kinase 24	GO:0005737//cytoplasm	GO:0004674//protein serine/threonine kinase activity;GO:0005524//ATP binding;GO:0004672//protein kinase activity	GO:0023014//signal transduction by protein phosphorylation;GO:0007346//regulation of mitotic cell cycle;GO:0032147//activation of protein kinase activity;GO:0031098//stress-activated protein kinase signaling cascade	K08835//serine/threonine-protein kinase OSR1/STK39 [EC:2.7.11.1]	NA	-2.957	gene
104901427	probable serine incorporator	GO:0016021//integral component of membrane	NA	NA	K11885//DNA damage-inducible protein 1	NA	-6.026	gene
104901426	myosin-6-like	GO:0016459//myosin complex	GO:0003779//actin binding;GO:0005524//ATP binding;GO:0003774//motor activity	GO:0007015//actin filament organization	K10357//myosin V	0.328	3.207	both
104901423	alcohol dehydrogenase-like 6	NA	GO:0008270//zinc ion binding;GO:0016491//oxidoreductase activity	NA	K00001//alcohol dehydrogenase [EC:1.1.1.1]	NA	2.277	gene
104901412	ribulose bisphosphate carboxylase/oxygenase activase, chloroplastic	NA	GO:0005524//ATP binding	NA	K02960//small subunit ribosomal protein S16e	NA	2.416	gene
104901410	protein POLLEN DEFECTIVE IN GUIDANCE 1	GO:0016021//integral component of membrane	NA	NA	NA	NA	3.519	gene
104901407	pescadillo homolog	GO:0005654//nucleoplasm;GO:0005730//nucleolus;GO:0030687//preribosome, large subunit precursor	GO:0043021//ribonucleoprotein complex binding	GO:0000466//maturation of 5.8S rRNA from tricistronic rRNA transcript (SSU-rRNA, 5.8S rRNA, LSU-rRNA);GO:0000463//maturation of LSU-rRNA from tricistronic rRNA transcript (SSU-rRNA, 5.8S rRNA, LSU-rRNA)	K14843//pescadillo	NA	-2.282	gene
104901397	aquaporin TIP3-1-like	GO:0016021//integral component of membrane	GO:0015267//channel activity	NA	K09873	-1.608	NA	promoter
104901395	transforming growth factor-beta receptor-associated protein 1	#N/A	NA	GO:0006886//intracellular protein transport;GO:0016192//vesicle-mediated transport	K20177//vacuolar protein sorting-associated protein 3	NA	-2.395	gene
104901392	lipoyl synthase, chloroplastic	GO:0005739//mitochondrion;GO:0009507//chloroplast	GO:0046872//metal ion binding;GO:0051539//4 iron, 4 sulfur cluster binding;GO:0016992//lipoate synthase activity	GO:0009249//protein lipoylation	K03644//lipoyl synthase [EC:2.8.1.8]	NA	1.547	gene
104901389	biotin carboxylase 2, chloroplastic	#N/A	GO:0003989//acetyl-CoA carboxylase activity;GO:0046872//metal ion binding;GO:0004075//biotin carboxylase activity;GO:0005524//ATP binding	GO:2001295//malonyl-CoA biosynthetic process;GO:0006633//fatty acid biosynthetic process	K01961//acetyl-CoA carboxylase, biotin carboxylase subunit [EC:6.4.1.2 6.3.4.14]	NA	-5.049	gene
104901387	DNA-binding protein RHL1	NA	GO:0003677//DNA binding	GO:0042023//DNA endoreduplication	NA	NA	3.775	gene
104901386	glutamate decarboxylase-like	GO:0009506//plasmodesma;GO:0005829//cytosol	GO:0004351//glutamate decarboxylase activity;GO:0030170//pyridoxal phosphate binding	GO:0006536//glutamate metabolic process;GO:0006538//glutamate catabolic process	K01580//glutamate decarboxylase [EC:4.1.1.15]	NA	-2.037	gene
104901382	E3 ubiquitin-protein ligase RING1-like	#N/A	GO:0061630//ubiquitin protein ligase activity	NA	K11982//E3 ubiquitin-protein ligase RNF115/126 [EC:2.3.2.27]	NA	-2.685	gene
104901368	putative 3,4-dihydroxy-2-butanone kinase	#N/A	GO:0005524//ATP binding;GO:0004371//glycerone kinase activity	GO:0006071//glycerol metabolic process	K00863//triose/dihydroxyacetone kinase / FAD-AMP lyase (cyclizing) [EC:2.7.1.28 2.7.1.29 4.6.1.15]	NA	-4.793	gene
104901360	probable cyclic nucleotide-gated ion channel 20, chloroplastic	GO:0016021//integral component of membrane	GO:0005216//ion channel activity	NA	K05391//cyclic nucleotide gated channel, plant	NA	-4.253	gene
104901355	lecithin-cholesterol acyltransferase-like 4	#N/A	GO:0008374//O-acyltransferase activity	GO:0006629//lipid metabolic process	K22389//phospholipase A1 [EC:3.1.1.32]	NA	-3.66	gene
104901319	calcium-transporting ATPase 3, endoplasmic reticulum-type	GO:0016021//integral component of membrane	GO:0005524//ATP binding;GO:0005388//calcium transmembrane transporter activity, phosphorylative mechanism	NA	K05853//Ca2+ transporting ATPase, sarcoplasmic/endoplasmic reticulum [EC:3.6.3.8]	NA	-2.821	gene
104901318	cyclic phosphodiesterase-like	NA	GO:0004112//cyclic-nucleotide phosphodiesterase activity	NA	K11138//telomere-associated protein RIF1	-2.821	21.652	both
104901307	GDSL esterase/lipase At4g18970-like	NA	GO:0016788//hydrolase activity, acting on ester bonds	NA	K10691//E3 ubiquitin-protein ligase UBR4 [EC:2.3.2.27];K01188//beta-glucosidase [EC:3.2.1.21];K14209//solute carrier family 36 (proton-coupled amino acid transporter);K00679;K01206//alpha-L-fucosidase [EC:3.2.1.51]	NA	-1.125	gene
104901305	GDSL esterase/lipase At5g45670	#N/A	GO:0016788//hydrolase activity, acting on ester bonds	NA	K10691//E3 ubiquitin-protein ligase UBR4 [EC:2.3.2.27];K14209//solute carrier family 36 (proton-coupled amino acid transporter);K01188//beta-glucosidase [EC:3.2.1.21];K00679;K01206//alpha-L-fucosidase [EC:3.2.1.51]	NA	-2.776	gene
104901285	serine/threonine-protein kinase MHK-like	#N/A	GO:0005524//ATP binding;GO:0004672//protein kinase activity	NA	K08830//renal tumor antigen [EC:2.7.11.22];K08829//male germ cell-associated kinase [EC:2.7.11.22]	NA	4.464	gene
104901284	valine--tRNA ligase-like	NA	GO:0004832//valine-tRNA ligase activity;GO:0005524//ATP binding;GO:0002161//aminoacyl-tRNA editing activity	GO:0006438//valyl-tRNA aminoacylation	K01873//valyl-tRNA synthetase [EC:6.1.1.9]	NA	1.933	gene
104901265	ornithine aminotransferase, mitochondrial	#N/A	GO:0004587//ornithine-oxo-acid transaminase activity;GO:0030170//pyridoxal phosphate binding	GO:0055129//L-proline biosynthetic process	K00819//ornithine--oxo-acid transaminase [EC:2.6.1.13]	NA	-5.136	gene
104901261	transcription factor TCP2	#N/A	GO:0003700//DNA-binding transcription factor activity	NA	K01534//Cd2+/Zn2+-exporting ATPase [EC:3.6.3.3 3.6.3.5]	NA	19.087	gene
104901249	probable beta-1,3-galactosyltransferase 20	GO:0005794//Golgi apparatus;GO:0016021//integral component of membrane	GO:0030246//carbohydrate binding;GO:0016757//transferase activity, transferring glycosyl groups	GO:0006486//protein glycosylation	K20843	NA	1.024	gene
104901234	probable 3-hydroxyisobutyrate dehydrogenase, mitochondrial	NA	GO:0050661//NADP binding;GO:0008442//3-hydroxyisobutyrate dehydrogenase activity;GO:0043621//protein self-association;GO:0051287//NAD binding	GO:0006574//valine catabolic process;GO:0006551//leucine metabolic process	K00020//3-hydroxyisobutyrate dehydrogenase [EC:1.1.1.31];K23146//3-hydroxypropionate dehydrogenase [EC:1.1.1.59]	NA	1.988	gene
104901233	obg-like ATPase 1	GO:0005737//cytoplasm	GO:0043022//ribosome binding;GO:0005524//ATP binding;GO:0043023//ribosomal large subunit binding;GO:0005525//GTP binding;GO:0016887//ATPase activity	NA	K19788//obg-like ATPase 1	NA	-1.6	gene
104901231	ADP-ribosylation factor GTPase-activating protein AGD12-like	#N/A	GO:0046872//metal ion binding;GO:0005096//GTPase activator activity	NA	K12486//stromal membrane-associated protein	NA	-3.128	gene
104901230	serine/threonine-protein phosphatase 6 regulatory subunit 3	#N/A	GO:0019903//protein phosphatase binding	GO:0043666//regulation of phosphoprotein phosphatase activity	K15501//serine/threonine-protein phosphatase 6 regulatory subunit 3	NA	-1.276	gene
104901227	CSC1-like protein ERD4	GO:0016021//integral component of membrane	NA	NA	K21989//calcium permeable stress-gated cation channel	NA	5.139	gene
104901225	fatty acid 2-hydroxylase 1-like	GO:0016021//integral component of membrane	GO:0005506//iron ion binding;GO:0016491//oxidoreductase activity	GO:0008610//lipid biosynthetic process	K19706	NA	4.922	gene
104901224	transmembrane protein 56-like	GO:0016021//integral component of membrane	NA	NA	NA	NA	5.4	gene
104901215	PAX3- and PAX7-binding protein 1-like	GO:0005634//nucleus	GO:0003677//DNA binding	GO:0006355//regulation of transcription, DNA-templated	K13211//GC-rich sequence DNA-binding factor	-0.955	18.687	both
104901188	putative D-cysteine desulfhydrase 1, mitochondrial	#N/A	GO:0003824//catalytic activity	NA	K05396//D-cysteine desulfhydrase [EC:4.4.1.15]	NA	-2.984	gene
104901187	NADH dehydrogenase [ubiquinone] 1 alpha subcomplex assembly factor 3-like	NA	NA	GO:0032981//mitochondrial respiratory chain complex I assembly	K09008//NADH dehydrogenase [ubiquinone] 1 alpha subcomplex assembly factor 3	NA	-5.356	gene
104901181	DNA damage-binding protein 1	GO:0005634//nucleus;GO:0031461//cullin-RING ubiquitin ligase complex	GO:0003684//damaged DNA binding;GO:0003676//nucleic acid binding	GO:0043161//proteasome-mediated ubiquitin-dependent protein catabolic process;GO:0006289//nucleotide-excision repair	K10610//DNA damage-binding protein 1	NA	5.547	gene
104901176	ABC transporter C family member 2-like	GO:0016021//integral component of membrane	GO:0005524//ATP binding;GO:0042626//ATPase-coupled transmembrane transporter activity;GO:0016887//ATPase activity	NA	K05666//ATP-binding cassette, subfamily C (CFTR/MRP), member 2	NA	-3.478	gene
104901168	protein BREAST CANCER SUSCEPTIBILITY 1 homolog	GO:0005634//nucleus	GO:0003677//DNA binding;GO:0008270//zinc ion binding;GO:0004842//ubiquitin-protein transferase activity	GO:0006281//DNA repair	K10683//BRCA1-associated RING domain protein 1	NA	2.32	gene
104901128	Fanconi anemia group J protein homolog	#N/A	GO:0003677//DNA binding;GO:0005524//ATP binding;GO:0003678//DNA helicase activity	GO:0006139//nucleobase-containing compound metabolic process	K15362//fanconi anemia group J protein [EC:3.6.4.12]	NA	3.902	gene
104901112	epidermal growth factor receptor substrate 15-like 1	#N/A	GO:0005509//calcium ion binding	NA	K12472//epidermal growth factor receptor substrate 15	NA	-2.994	gene
104901104	B3 domain-containing transcription repressor VAL1-like	GO:0005634//nucleus	GO:0003677//DNA binding;GO:0008270//zinc ion binding	NA	NA	-1.03	-1.03	both
104901069	(3S,6E)-nerolidol synthase 1-like	NA	GO:0000287//magnesium ion binding;GO:0010333//terpene synthase activity	NA	K14175	NA	-1.681	gene
104901036	elongation factor 1-gamma-like	#N/A	GO:0003746//translation elongation factor activity	NA	K03233//elongation factor 1-gamma	NA	2.143	gene
104901034	putative Myb family transcription factor At1g14600	GO:0005634//nucleus	GO:0003677//DNA binding	NA	K06236//collagen, type I, alpha;K14491//two-component response regulator ARR-B family;K22218	NA	-3.142	gene
104900993	starch synthase 3, chloroplastic/amyloplastic	#N/A	GO:2001070//starch binding;GO:0004373//glycogen (starch) synthase activity	NA	K00703//starch synthase [EC:2.4.1.21]	NA	-5.397	gene
104900989	probable beta-1,3-galactosyltransferase 3	GO:0016021//integral component of membrane;GO:0000139//Golgi membrane	GO:0016757//transferase activity, transferring glycosyl groups	GO:0006486//protein glycosylation	K20855	NA	3.073	gene
104900975	dolichyl-diphosphooligosaccharide--protein glycosyltransferase subunit 1A	GO:0016021//integral component of membrane;GO:0005789//endoplasmic reticulum membrane	GO:0004579//dolichyl-diphosphooligosaccharide-protein glycotransferase activity	GO:0006486//protein glycosylation	K12666//oligosaccharyltransferase complex subunit alpha (ribophorin I)	NA	2.425	gene
104900945	protein CUP-SHAPED COTYLEDON 3	GO:0005634//nucleus	GO:0003677//DNA binding	GO:0006355//regulation of transcription, DNA-templated	NA	4.012	2.825	both
104900925	E3 ubiquitin-protein ligase COP1-like	#N/A	GO:0061630//ubiquitin protein ligase activity	NA	K10143//E3 ubiquitin-protein ligase RFWD2 [EC:2.3.2.27]	NA	2.394	gene
104900924	ubiquinol oxidase 4, chloroplastic/chromoplastic	GO:0016021//integral component of membrane;GO:0070469//respirasome	GO:0102721//ubiquinol:oxygen oxidoreductase activity;GO:0046872//metal ion binding;GO:0009916//alternative oxidase activity	NA	K17893//ubiquinol oxidase [EC:1.10.3.11]	NA	-5.503	gene
104900920	protein NRT1/ PTR FAMILY 5.5-like	GO:0016021//integral component of membrane	GO:0022857//transmembrane transporter activity	NA	K14638//solute carrier family 15 (peptide/histidine transporter), member 3/4	NA	3.12	gene
104900911	cytosolic sulfotransferase 5-like	#N/A	GO:0008146//sulfotransferase activity	NA	K22312	NA	4.678	gene
104900900	mannan endo-1,4-beta-mannosidase 6-like	GO:0016021//integral component of membrane	GO:0004553//hydrolase activity, hydrolyzing O-glycosyl compounds	GO:0005975//carbohydrate metabolic process	K19355//mannan endo-1,4-beta-mannosidase [EC:3.2.1.78]	-1.321	NA	promoter
104900891	ER membrane protein complex subunit 3	GO:0005783//endoplasmic reticulum;GO:0016021//integral component of membrane;GO:0005739//mitochondrion	NA	NA	NA	NA	1.381	gene
104900882	tonoplast dicarboxylate transporter	GO:0016021//integral component of membrane;GO:0005773//vacuole	GO:0015140//malate transmembrane transporter activity;GO:0022857//transmembrane transporter activity	NA	K14445//solute carrier family 13 (sodium-dependent dicarboxylate transporter), member 2/3/5	NA	1.631	gene
104900833	inositol transporter 4-like	GO:0016021//integral component of membrane	GO:0016740//transferase activity;GO:0022857//transmembrane transporter activity	NA	K08150//MFS transporter, SP family, solute carrier family 2 (myo-inositol transporter), member 13	1.572	NA	promoter
104900830	eukaryotic peptide chain release factor GTP-binding subunit ERF3A-like	#N/A	GO:0005525//GTP binding;GO:0003924//GTPase activity	NA	K03267//peptide chain release factor subunit 3	NA	3.182	gene
104900820	cation-chloride cotransporter 1	GO:0016021//integral component of membrane	GO:0015377//cation:chloride symporter activity;GO:0022857//transmembrane transporter activity	GO:0006811//ion transport	K14427//solute carrier family 12 (potassium/chloride transporter), member 4/5/6	NA	-3.121	gene
104900799	SWI/SNF complex subunit SWI3B	GO:0005634//nucleus	GO:0003677//DNA binding	NA	K11649//SWI/SNF related-matrix-associated actin-dependent regulator of chromatin subfamily C	NA	1.183	gene
104900797	omega-6 fatty acid desaturase, chloroplastic	GO:0016021//integral component of membrane	NA	GO:0006629//lipid metabolic process	K10255	2.806	NA	promoter
104900793	alpha-ketoglutarate-dependent dioxygenase alkB homolog 2	#N/A	GO:0016491//oxidoreductase activity	NA	K10859//DNA oxidative demethylase [EC:1.14.11.33]	NA	3.104	gene
104900789	phosphoglycolate phosphatase 2	GO:0009507//chloroplast	GO:0016791//phosphatase activity;GO:0008967//phosphoglycolate phosphatase activity	GO:0016311//dephosphorylation	K19269//phosphoglycolate phosphatase [EC:3.1.3.18 3.1.3.48]	NA	5.026	gene
104900783	psbP domain-containing protein 3, chloroplastic	GO:0019898//extrinsic component of membrane;GO:0009654//photosystem II oxygen evolving complex	GO:0005509//calcium ion binding	GO:0015979//photosynthesis	K09264//MADS-box transcription factor, plant	NA	-1.183	gene
104900738	clathrin light chain 2	GO:0030132//clathrin coat of coated pit;GO:0030130//clathrin coat of trans-Golgi network vesicle	GO:0005198//structural molecule activity	GO:0006886//intracellular protein transport;GO:0016192//vesicle-mediated transport	K04645//clathrin light chain B	-2.104	NA	promoter
104900735	mediator of RNA polymerase II transcription subunit 16	GO:0016592//mediator complex	NA	GO:0006355//regulation of transcription, DNA-templated	NA	18.683	NA	promoter
104900714	DNA mismatch repair protein msh3	#N/A	GO:0005524//ATP binding;GO:0030983//mismatched DNA binding;GO:0004519//endonuclease activity;GO:0016887//ATPase activity	GO:0045910//negative regulation of DNA recombination;GO:0006298//mismatch repair	K07456	NA	4.249	gene
104900708	transmembrane protein 120 homolog	GO:0016021//integral component of membrane	NA	NA	NA	0.244	2.805	both
104900702	endoribonuclease Dicer homolog 1	#N/A	GO:0003723//RNA binding;GO:0003677//DNA binding;GO:0004525//ribonuclease III activity;GO:0005524//ATP binding	GO:0006396//RNA processing;GO:0031047//gene silencing by RNA	K11592//endoribonuclease Dicer [EC:3.1.26.-]	NA	3.942	gene
104900688	homeobox-leucine zipper protein ATHB-52	GO:0005634//nucleus	GO:0043565//sequence-specific DNA binding	GO:0006355//regulation of transcription, DNA-templated;GO:0045893//positive regulation of transcription, DNA-templated	K22756//E3 SUMO-protein ligase NSE2 [EC:2.3.2.-];K09338//homeobox-leucine zipper protein	4.862	NA	promoter
104900687	prohibitin-6, mitochondrial-like	GO:0005743//mitochondrial inner membrane	NA	NA	K17081//prohibitin 2	NA	-2.203	gene
104900669	cellulose synthase A catalytic subunit 8 [UDP-forming]	GO:0016021//integral component of membrane;GO:0005886//plasma membrane	GO:0016760//cellulose synthase (UDP-forming) activity;GO:0046872//metal ion binding	GO:0030244//cellulose biosynthetic process;GO:0071555//cell wall organization	K10999//cellulose synthase A [EC:2.4.1.12]	NA	3.98	gene
104900649	putative membrane-bound O-acyltransferase C24H6.01c	GO:0016021//integral component of membrane	NA	NA	K21398//natural resistance-associated macrophage protein 2	NA	1.82	gene
104900648	peroxisome biogenesis protein 6	NA	GO:0005524//ATP binding	NA	K13339//peroxin-6	1.083	NA	promoter
104900630	dnaJ homolog 1, mitochondrial-like	#N/A	GO:0046872//metal ion binding;GO:0005524//ATP binding;GO:0051082//unfolded protein binding;GO:0031072//heat shock protein binding	GO:0006457//protein folding;GO:0009408//response to heat	K03686//molecular chaperone DnaJ	NA	-4.17	gene
104900603	ras-related protein RABA1f	#N/A	GO:0005525//GTP binding;GO:0003924//GTPase activity	NA	K07904//Ras-related protein Rab-11A;K07976//Rab family, other	NA	2.032	gene
104900598	GDSL esterase/lipase At5g45960-like	#N/A	GO:0016788//hydrolase activity, acting on ester bonds	NA	K10691//E3 ubiquitin-protein ligase UBR4 [EC:2.3.2.27];K01188//beta-glucosidase [EC:3.2.1.21];K00679;K14209//solute carrier family 36 (proton-coupled amino acid transporter);K01206//alpha-L-fucosidase [EC:3.2.1.51]	NA	-2.394	gene
104900589	probable ATP-dependent RNA helicase DHX35	#N/A	GO:0005524//ATP binding;GO:0004386//helicase activity	NA	K13117//ATP-dependent RNA helicase DDX35 [EC:3.6.4.13]	2.391	NA	promoter
104900540	probable carboxylesterase 2	#N/A	GO:0016787//hydrolase activity	NA	K13258;K20506	NA	2.07	gene
104900512	DNA polymerase beta	GO:0005634//nucleus	GO:0046872//metal ion binding;GO:0003887//DNA-directed DNA polymerase activity;GO:0003677//DNA binding	GO:0006281//DNA repair	K03512//DNA polymerase lambda [EC:2.7.7.7 4.2.99.-]	NA	2.866	gene
104900495	CBL-interacting protein kinase 5	NA	GO:0004674//protein serine/threonine kinase activity;GO:0005524//ATP binding	GO:0007165//signal transduction	K07198//5'-AMP-activated protein kinase, catalytic alpha subunit [EC:2.7.11.11]	1.38	4.142	both
104900467	SNF1-related protein kinase catalytic subunit alpha KIN10-like	#N/A	GO:0004674//protein serine/threonine kinase activity;GO:0005524//ATP binding	GO:0043066//negative regulation of apoptotic process	K07198//5'-AMP-activated protein kinase, catalytic alpha subunit [EC:2.7.11.11]	3.345	NA	promoter
104900440	lysosomal beta glucosidase-like	GO:0016021//integral component of membrane	GO:0008422//beta-glucosidase activity;GO:0004553//hydrolase activity, hydrolyzing O-glycosyl compounds	GO:0009251//glucan catabolic process;GO:0005975//carbohydrate metabolic process	K05349//beta-glucosidase [EC:3.2.1.21]	2.964	4.953	both
104900424	aluminum-activated malate transporter 2-like	GO:0016021//integral component of membrane	NA	GO:0015743//malate transport	K03695//ATP-dependent Clp protease ATP-binding subunit ClpB	NA	-2.194	gene
104900352	serine/threonine-protein kinase D6PK	GO:0005634//nucleus;GO:0005886//plasma membrane;GO:0005737//cytoplasm	GO:0004674//protein serine/threonine kinase activity;GO:0005524//ATP binding;GO:0004672//protein kinase activity	GO:0006468//protein phosphorylation	K08286	NA	-1.438	gene
104900340	fatty acyl-CoA reductase 3-like	#N/A	GO:0080019//fatty-acyl-CoA reductase (alcohol-forming) activity;GO:0102965//alcohol-forming fatty acyl-CoA reductase activity	GO:0006629//lipid metabolic process	K13356//alcohol-forming fatty acyl-CoA reductase [EC:1.2.1.84]	NA	-1.726	gene
104900310	probable calcium-binding protein CML48	#N/A	GO:0005509//calcium ion binding	NA	K13448//calcium-binding protein CML	4.168	NA	promoter
104900308	DNA polymerase epsilon subunit 3	GO:0005634//nucleus;GO:0016021//integral component of membrane	GO:0046982//protein heterodimerization activity	NA	K11323//histone arginine demethylase JMJD6 [EC:1.14.11.-];K02326//DNA polymerase epsilon subunit 3 [EC:2.7.7.7]	4.168	NA	promoter
104900307	protein transport protein sec24	GO:0070971//endoplasmic reticulum exit site;GO:0030127//COPII vesicle coat	GO:0008270//zinc ion binding	GO:0006886//intracellular protein transport;GO:0048658//anther wall tapetum development;GO:0006888//endoplasmic reticulum to Golgi vesicle-mediated transport;GO:0010584//pollen exine formation	K14006//protein transport protein SEC23;K14007//protein transport protein SEC24	NA	1.55	gene
104900288	B3 domain-containing transcription repressor VAL1-like	GO:0005634//nucleus	GO:0003677//DNA binding;GO:0008270//zinc ion binding	NA	K09287//RAV-like factor	NA	-1.061	gene
104900287	transcription factor RF2b-like	#N/A	GO:0003700//DNA-binding transcription factor activity	NA	K20557//transcription factor VIP1	1.693	NA	promoter
104900261	U2 small nuclear ribonucleoprotein B''	#N/A	GO:0003723//RNA binding	NA	K11094//U2 small nuclear ribonucleoprotein B''	NA	2.304	gene
104900242	ubiquitin-activating enzyme E1 1	GO:0005634//nucleus;GO:0016021//integral component of membrane;GO:0005737//cytoplasm	GO:0005524//ATP binding;GO:0004839//ubiquitin activating enzyme activity	GO:0006511//ubiquitin-dependent protein catabolic process;GO:0016567//protein ubiquitination;GO:0032446//protein modification by small protein conjugation;GO:0006974//cellular response to DNA damage stimulus	K03178//ubiquitin-activating enzyme E1 [EC:6.2.1.45]	2.087	2.087	both
104900228	transcription initiation factor TFIID subunit 15b	#N/A	GO:0003723//RNA binding;GO:0046872//metal ion binding	NA	K13098//RNA-binding protein FUS	1.708	NA	promoter
104900225	WAT1-related protein At3g30340-like	GO:0016021//integral component of membrane	GO:0022857//transmembrane transporter activity	NA	K17500//integrin-linked kinase-associated serine/threonine phosphatase 2C [EC:3.1.3.16]	NA	-3.001	gene
104900219	mitoferrin-like	GO:0016021//integral component of membrane	GO:0005347//ATP transmembrane transporter activity	NA	K15113//solute carrier family 25 (mitochondrial iron transporter), member 28/37	NA	2.163	gene
104900208	sorting nexin 2B	#N/A	GO:0035091//phosphatidylinositol binding	NA	K17917//sorting nexin-1/2	NA	5.18	gene
104900201	phototropin-1	NA	GO:0005524//ATP binding;GO:0004672//protein kinase activity	NA	K20715	-1.496	NA	promoter
104900188	ankyrin repeat-containing protein At5g02620	GO:0016021//integral component of membrane	NA	NA	K15503//serine/threonine-protein phosphatase 6 regulatory ankyrin repeat subunit B;K01184//polygalacturonase [EC:3.2.1.15]	-1.251	NA	promoter
104900185	3-ketoacyl-CoA synthase 12	GO:0016020//membrane	GO:0016747//transferase activity, transferring acyl groups other than amino-acyl groups	GO:0006633//fatty acid biosynthetic process	K15397//3-ketoacyl-CoA synthase [EC:2.3.1.199]	NA	-1.449	gene
104900172	very-long-chain (3R)-3-hydroxyacyl-CoA dehydratase 2	GO:0016021//integral component of membrane;GO:0005789//endoplasmic reticulum membrane	GO:0102158//very-long-chain 3-hydroxyacyl-CoA dehydratase activity;GO:0102345//3-hydroxy-lignoceroyl-CoA dehydratase activity;GO:0102344//3-hydroxy-behenoyl-CoA dehydratase activity;GO:0102343//3-hydroxy-arachidoyl-CoA dehydratase activity	GO:0006633//fatty acid biosynthetic process	K10703//very-long-chain (3R)-3-hydroxyacyl-CoA dehydratase [EC:4.2.1.134]	-1.519	NA	promoter
104900142	osmotin-like protein	GO:0005576//extracellular region	NA	GO:0006952//defense response	K04733//interleukin-1 receptor-associated kinase 4 [EC:2.7.11.1]	3.729	-0.775	both
104900106	eukaryotic translation initiation factor 5B-like	NA	GO:0005525//GTP binding;GO:0003924//GTPase activity	NA	K03243//translation initiation factor 5B	3.635	NA	promoter
104900103	factor of DNA methylation 4	NA	NA	GO:0031047//gene silencing by RNA	K18626//trichohyalin;K10406//kinesin family member C2/C3;K17824//DCN1-like protein 4/5	NA	2.376	gene
104900100	inactive rhomboid protein 1	GO:0016021//integral component of membrane	GO:0004252//serine-type endopeptidase activity	NA	K07059//uncharacterized protein;K09651//rhomboid domain-containing protein 1 [EC:3.4.21.-]	2.481	2.481	both
104900036	copper transporter 6-like	GO:0016021//integral component of membrane	GO:0005375//copper ion transmembrane transporter activity	NA	K14686//solute carrier family 31 (copper transporter), member 1	-1.33	NA	promoter
104900022	cytosolic enolase 3	GO:0000015//phosphopyruvate hydratase complex	GO:0000287//magnesium ion binding;GO:0004634//phosphopyruvate hydratase activity	GO:0006096//glycolytic process	K01689//enolase [EC:4.2.1.11]	1.666	NA	promoter
104899994	superoxide dismutase [Fe] 3, chloroplastic	#N/A	GO:0004784//superoxide dismutase activity;GO:0046872//metal ion binding	NA	K04564//superoxide dismutase, Fe-Mn family [EC:1.15.1.1]	NA	-1.368	gene
104899969	leucine-rich repeat receptor-like protein kinase TDR	GO:0016021//integral component of membrane	GO:0004713//protein tyrosine kinase activity;GO:0005524//ATP binding	NA	K00924	-1.659	NA	promoter
104899962	vacuolar cation/proton exchanger 3-like	GO:0005774//vacuolar membrane;GO:0016021//integral component of membrane	GO:0015369//calcium:proton antiporter activity	NA	K07300//Ca2+:H+ antiporter	20.747	NA	promoter
104899932	asparagine synthetase [glutamine-hydrolyzing] 1-like	#N/A	GO:0005524//ATP binding;GO:0004066//asparagine synthase (glutamine-hydrolyzing) activity	GO:0006541//glutamine metabolic process;GO:0006529//asparagine biosynthetic process	K01953//asparagine synthase (glutamine-hydrolysing) [EC:6.3.5.4]	-1.262	NA	promoter
104899915	probable apyrase 6	GO:0016021//integral component of membrane	GO:0005524//ATP binding;GO:0016787//hydrolase activity	NA	K01510//apyrase [EC:3.6.1.5]	NA	-2.613	gene
104899900	inactive protein RESTRICTED TEV MOVEMENT 2	GO:0016021//integral component of membrane	NA	NA	K13993	1.078	NA	promoter
104899893	serine/threonine-protein kinase TOUSLED	#N/A	GO:0005524//ATP binding;GO:0004672//protein kinase activity	NA	K08864//tousled-like kinase [EC:2.7.11.1]	NA	-1.104	gene
104899892	protein AIR2	#N/A	GO:0008270//zinc ion binding;GO:0003676//nucleic acid binding	NA	K09250//cellular nucleic acid-binding protein	NA	5.456	gene
104899872	methyl-CpG-binding domain-containing protein 11-like	GO:0042025//host cell nucleus	GO:0003677//DNA binding	NA	K17046//protein DEK;K02213//cell division control protein 6;K11267//sister chromatid cohesion protein PDS5	NA	2.062	gene
104899861	serine/threonine-protein phosphatase BSL3	GO:0005634//nucleus	GO:0046872//metal ion binding;GO:0004722//protein serine/threonine phosphatase activity	GO:0009742//brassinosteroid mediated signaling pathway	K01090//protein phosphatase [EC:3.1.3.16]	NA	6.565	gene
104899853	vacuole membrane protein KMS1-like	GO:0016021//integral component of membrane	NA	NA	K21248//vacuole membrane protein 1	NA	2.627	gene
104899848	probable receptor protein kinase TMK1	GO:0016021//integral component of membrane	GO:0004674//protein serine/threonine kinase activity;GO:0005524//ATP binding	NA	K00924	NA	1.84	gene
104899845	serine/threonine-protein kinase Nek5-like	#N/A	GO:0005524//ATP binding;GO:0004672//protein kinase activity	NA	K08857//NIMA (never in mitosis gene a)-related kinase 1/4/5 [EC:2.7.11.1]	NA	6.128	gene
104899822	protein HOTHEAD-like	#N/A	GO:0016614//oxidoreductase activity, acting on CH-OH group of donors;GO:0050660//flavin adenine dinucleotide binding	NA	K15403	NA	1.788	gene
104899818	vacuolar protein sorting-associated protein 24 homolog 1	#N/A	NA	GO:0007034//vacuolar transport	K12193//charged multivesicular body protein 3	-2.51	NA	promoter
104899817	phosphomannomutase-like	GO:0005737//cytoplasm	GO:0004615//phosphomannomutase activity	GO:0009298//GDP-mannose biosynthetic process	K17497//phosphomannomutase [EC:5.4.2.8]	NA	1.826	gene
104899813	beta-galactosidase 17	#N/A	GO:0004565//beta-galactosidase activity	GO:0005975//carbohydrate metabolic process	K12309//beta-galactosidase [EC:3.2.1.23]	NA	1.163	gene
104899803	protein STABILIZED1	NA	NA	GO:0000398//mRNA splicing, via spliceosome	K12855//pre-mRNA-processing factor 6	NA	-5.896	gene
104899789	putative phospholipid-transporting ATPase 4	GO:0016021//integral component of membrane	GO:0000287//magnesium ion binding;GO:0005524//ATP binding;GO:0140326//ATPase-coupled intramembrane lipid transporter activity	GO:0015914//phospholipid transport	K01530//phospholipid-translocating ATPase [EC:7.6.2.1]	NA	2.676	gene
104899777	myosin-17-like	GO:0016459//myosin complex	GO:0003779//actin binding;GO:0005524//ATP binding;GO:0003774//motor activity	GO:0007015//actin filament organization	K10357//myosin V	NA	-3.486	gene
104899765	high-affinity nitrate transporter 2.1-like	GO:0016021//integral component of membrane	GO:0022857//transmembrane transporter activity	NA	K02575	NA	-3.144	gene
104899756	AP2-like ethylene-responsive transcription factor ANT	GO:0005634//nucleus	GO:0003677//DNA binding;GO:0003700//DNA-binding transcription factor activity	NA	K09285	NA	-2.42	gene
104899753	growth-regulating factor 5	GO:0005634//nucleus	GO:0005524//ATP binding	GO:0032502//developmental process;GO:0006355//regulation of transcription, DNA-templated;GO:0006351//transcription, DNA-templated	K22382//WD repeat-containing protein 26;K15601//lysine-specific demethylase 3 [EC:1.14.11.-]	NA	1.328	gene
104899749	exportin-T	GO:0005634//nucleus;GO:0005737//cytoplasm	GO:0008536//Ran GTPase binding;GO:0000049//tRNA binding	GO:0071528//tRNA re-export from nucleus	K14288//exportin-T	-1.975	NA	promoter
104899745	linoleate 13S-lipoxygenase 3-1, chloroplastic	#N/A	GO:0016702//oxidoreductase activity, acting on single donors with incorporation of molecular oxygen, incorporation of two atoms of oxygen;GO:0046872//metal ion binding	GO:0031408//oxylipin biosynthetic process	K00454	-1.066	NA	promoter
104899741	cation/calcium exchanger 4	GO:0016021//integral component of membrane	NA	GO:0055085//transmembrane transport	K13754//solute carrier family 24 (sodium/potassium/calcium exchanger), member 6	NA	-1.201	gene
104899724	protein FLUORESCENT IN BLUE LIGHT, chloroplastic	GO:0016021//integral component of membrane	NA	NA	NA	NA	1.594	gene
104899723	nuclear pore complex protein NUP107	GO:0031965//nuclear membrane;GO:0031080//nuclear pore outer ring	GO:0017056//structural constituent of nuclear pore	GO:0006406//mRNA export from nucleus;GO:0006606//protein import into nucleus	K14301//nuclear pore complex protein Nup107	0.848	3.629	both
104899693	GDSL esterase/lipase 5-like	#N/A	GO:0016788//hydrolase activity, acting on ester bonds	NA	K10691//E3 ubiquitin-protein ligase UBR4 [EC:2.3.2.27];K01188//beta-glucosidase [EC:3.2.1.21];K00679;K01206//alpha-L-fucosidase [EC:3.2.1.51]	NA	-1.66	gene
104899675	ubiquitin-conjugating enzyme E2 34-like	GO:0016021//integral component of membrane	NA	NA	K04554//ubiquitin-conjugating enzyme E2 J2 [EC:2.3.2.23]	2.006	NA	promoter
104899665	26S protease regulatory subunit 7	GO:0005634//nucleus;GO:0000502//proteasome complex;GO:0005737//cytoplasm	GO:0016787//hydrolase activity;GO:0005524//ATP binding	GO:0030163//protein catabolic process	K03061//26S proteasome regulatory subunit T1	2.932	NA	promoter
104899663	protein STRUBBELIG-RECEPTOR FAMILY 7-like	GO:0016021//integral component of membrane	GO:0005524//ATP binding;GO:0004672//protein kinase activity	NA	K04733//interleukin-1 receptor-associated kinase 4 [EC:2.7.11.1]	NA	-2.949	gene
104899661	ATPase 10, plasma membrane-type	GO:0016021//integral component of membrane;GO:0005886//plasma membrane	GO:0005524//ATP binding;GO:0008553//proton-exporting ATPase activity, phosphorylative mechanism	GO:0120029//proton export across plasma membrane	K01535//H+-transporting ATPase [EC:7.1.2.1]	NA	2.852	gene
104899640	glycine--tRNA ligase 2, chloroplastic/mitochondrial	GO:0005737//cytoplasm	GO:0004814//arginine-tRNA ligase activity;GO:0004820//glycine-tRNA ligase activity;GO:0005524//ATP binding	GO:0006426//glycyl-tRNA aminoacylation;GO:0006420//arginyl-tRNA aminoacylation	K14164	NA	20.733	gene
104899632	probable disease resistance protein At4g27220	#N/A	GO:0043531//ADP binding	NA	K13459	1.203	NA	promoter
104899622	probable disease resistance protein At1g52660	#N/A	GO:0043531//ADP binding	NA	K13459	NA	-4.421	gene
104899592	transmembrane protein 208-like	GO:0016021//integral component of membrane	NA	NA	K10865//double-strand break repair protein MRE11	NA	-1.781	gene
104899585	probable receptor protein kinase TMK1	GO:0016021//integral component of membrane	GO:0004674//protein serine/threonine kinase activity;GO:0005524//ATP binding;GO:0004672//protein kinase activity	NA	K00924	NA	-2.016	gene
104899537	GPI transamidase component PIG-S-like	GO:0042765//GPI-anchor transamidase complex	NA	GO:0016255//attachment of GPI anchor to protein	K05291//phosphatidylinositol glycan, class S	NA	4.28	gene
104899532	39S ribosomal protein L4, mitochondrial	GO:0005840//ribosome	GO:0003735//structural constituent of ribosome	GO:0006412//translation	K02926//large subunit ribosomal protein L4	NA	-2.841	gene
104899497	desumoylating isopeptidase 1	GO:0005634//nucleus;GO:0005737//cytoplasm	NA	NA	K22762//desumoylating isopeptidase 1 [EC:3.4.-.-]	NA	3.506	gene
104899457	glutamine--tRNA ligase-like	GO:0005737//cytoplasm	GO:0005524//ATP binding;GO:0004819//glutamine-tRNA ligase activity	GO:0006425//glutaminyl-tRNA aminoacylation	K01886//glutaminyl-tRNA synthetase [EC:6.1.1.18]	NA	3.001	gene
104899450	sterol 3-beta-glucosyltransferase UGT80A2	#N/A	GO:0016758//transferase activity, transferring hexosyl groups	GO:0030259//lipid glycosylation;GO:0005975//carbohydrate metabolic process	K05841//sterol 3beta-glucosyltransferase [EC:2.4.1.173]	NA	2.646	gene
104899404	glutathione S-transferase omega-like 2	#N/A	GO:0004364//glutathione transferase activity	NA	K07393//glutathionyl-hydroquinone reductase [EC:1.8.5.7]	1.848	NA	promoter
104899399	cysteine-rich repeat secretory protein 11	GO:0016021//integral component of membrane	NA	NA	K04733//interleukin-1 receptor-associated kinase 4 [EC:2.7.11.1]	NA	1.254	gene
104899341	glutaredoxin-C5, chloroplastic	#N/A	GO:0015035//protein disulfide oxidoreductase activity;GO:0009055//electron transfer activity	GO:0045454//cell redox homeostasis	K03676//glutaredoxin 3	NA	-3.854	gene
104899331	39S ribosomal protein L47, mitochondrial	GO:0005761//mitochondrial ribosome	GO:0003735//structural constituent of ribosome	GO:0006412//translation	K17428//large subunit ribosomal protein L47	NA	2.983	gene
104899329	receptor-like serine/threonine-protein kinase ALE2	GO:0016021//integral component of membrane	GO:0005524//ATP binding;GO:0004672//protein kinase activity	NA	K04733//interleukin-1 receptor-associated kinase 4 [EC:2.7.11.1]	NA	4.544	gene
104899320	cystinosin homolog	GO:0016021//integral component of membrane	NA	NA	K12386//cystinosin	NA	1.43	gene
104899293	chlorophyll a-b binding protein of LHCII type 1	GO:0009535//chloroplast thylakoid membrane;GO:0009523//photosystem II;GO:0016021//integral component of membrane;GO:0009522//photosystem I	GO:0016168//chlorophyll binding	GO:0009765//photosynthesis, light harvesting;GO:0018298//protein-chromophore linkage	K14172	NA	4.262	gene
104899292	protease Do-like 2, chloroplastic	GO:0009535//chloroplast thylakoid membrane;GO:0009533//chloroplast stromal thylakoid;GO:0009941//chloroplast envelope	GO:0004252//serine-type endopeptidase activity	GO:0010206//photosystem II repair;GO:0030163//protein catabolic process;GO:0009658//chloroplast organization	K08669//HtrA serine peptidase 2 [EC:3.4.21.108]	NA	3.097	gene
104899290	4-hydroxybenzoate polyprenyltransferase, mitochondrial	GO:0016021//integral component of membrane;GO:0031305//integral component of mitochondrial inner membrane	GO:0004659//prenyltransferase activity;GO:0002083//4-hydroxybenzoate decaprenyltransferase activity;GO:0047293//4-hydroxybenzoate nonaprenyltransferase activity	GO:0008299//isoprenoid biosynthetic process;GO:0006744//ubiquinone biosynthetic process;GO:0009793//embryo development ending in seed dormancy	K06125//4-hydroxybenzoate polyprenyltransferase [EC:2.5.1.39]	NA	-4.075	gene
104899264	serine/threonine-protein phosphatase BSL1	GO:0005634//nucleus;GO:0005737//cytoplasm	GO:0046872//metal ion binding;GO:0004722//protein serine/threonine phosphatase activity	GO:0009742//brassinosteroid mediated signaling pathway	K01090//protein phosphatase [EC:3.1.3.16]	NA	4.823	gene
104899261	sugar transporter ERD6-like 16	GO:0005887//integral component of plasma membrane;GO:0016021//integral component of membrane	GO:0005351//carbohydrate:proton symporter activity;GO:0022857//transmembrane transporter activity	GO:0008643//carbohydrate transport;GO:0046323//glucose import	K08145//MFS transporter, SP family, solute carrier family 2 (facilitated glucose transporter), member 8	NA	4.403	gene
104899259	BAG family molecular chaperone regulator 3-like	#N/A	GO:0051087//chaperone binding	NA	K09555//BCL2-associated athanogene 1	1.235	1.235	both
104899230	chloride channel protein CLC-f	GO:0016021//integral component of membrane	GO:0005247//voltage-gated chloride channel activity	NA	K05012//chloride channel 3/4/5;K05016//chloride channel 7	NA	-4.469	gene
104899223	probable LRR receptor-like serine/threonine-protein kinase At4g08850	GO:0016021//integral component of membrane	GO:0005524//ATP binding;GO:0004672//protein kinase activity	NA	K13420	20.989	NA	promoter
104899210	rho GDP-dissociation inhibitor 1-like	GO:0005737//cytoplasm	GO:0005094//Rho GDP-dissociation inhibitor activity	NA	K12462//Rho GDP-dissociation inhibitor	-1.53	NA	promoter
104899200	long-chain-alcohol oxidase FAO2	GO:0016020//membrane;GO:0005783//endoplasmic reticulum;GO:0016021//integral component of membrane	GO:0046577//long-chain-alcohol oxidase activity;GO:0050660//flavin adenine dinucleotide binding	NA	K17756	NA	-3.547	gene
104899195	glutathione gamma-glutamylcysteinyltransferase 1-like	#N/A	GO:0046872//metal ion binding;GO:0016756//glutathione gamma-glutamylcysteinyltransferase activity	GO:0010038//response to metal ion;GO:0046938//phytochelatin biosynthetic process	K05941//glutathione gamma-glutamylcysteinyltransferase [EC:2.3.2.15]	NA	-2.825	gene
104899189	heparan-alpha-glucosaminide N-acetyltransferase-like	GO:0016021//integral component of membrane	NA	NA	K10532//heparan-alpha-glucosaminide N-acetyltransferase [EC:2.3.1.78]	NA	5.585	gene
104899149	eukaryotic translation initiation factor 6	GO:0005730//nucleolus;GO:0005829//cytosol;GO:0005737//cytoplasm	GO:0043022//ribosome binding;GO:0003743//translation initiation factor activity;GO:0043023//ribosomal large subunit binding	GO:0042256//mature ribosome assembly;GO:0042273//ribosomal large subunit biogenesis;GO:0009793//embryo development ending in seed dormancy;GO:0071215//cellular response to abscisic acid stimulus	K03264//translation initiation factor 6	3.787	NA	promoter
104899148	cellulose synthase-like protein D5	GO:0005794//Golgi apparatus;GO:0016021//integral component of membrane;GO:0005802//trans-Golgi network;GO:0005886//plasma membrane	GO:0016760//cellulose synthase (UDP-forming) activity;GO:0051753//mannan synthase activity	GO:0009833//plant-type primary cell wall biogenesis;GO:0030244//cellulose biosynthetic process;GO:0071555//cell wall organization	K00770	-2.326	-2.326	both
104899112	pyruvate, phosphate dikinase, chloroplastic	NA	GO:0046872//metal ion binding;GO:0005524//ATP binding;GO:0016301//kinase activity;GO:0050242//pyruvate, phosphate dikinase activity	GO:0006090//pyruvate metabolic process	K01006	NA	1.006	gene
104899092	outer envelope pore protein 16-4, chloroplastic	GO:0042721//TIM22 mitochondrial import inner membrane insertion complex	NA	GO:0045039//protein insertion into mitochondrial inner membrane	K17795//mitochondrial import inner membrane translocase subunit TIM17;K17790//mitochondrial import inner membrane translocase subunit TIM22	NA	4.484	gene
104899089	UDP-glucuronic acid decarboxylase 2	GO:0016021//integral component of membrane	GO:0048040//UDP-glucuronate decarboxylase activity	NA	K08678//UDP-glucuronate decarboxylase [EC:4.1.1.35]	NA	-2.343	gene
104899086	ABC transporter C family member 14-like	GO:0016021//integral component of membrane	GO:0005524//ATP binding;GO:0042626//ATPase-coupled transmembrane transporter activity;GO:0016887//ATPase activity	NA	K05666//ATP-binding cassette, subfamily C (CFTR/MRP), member 2	NA	-1.096	gene
104899076	nucleobase-ascorbate transporter 3	GO:0016021//integral component of membrane	GO:0022857//transmembrane transporter activity	NA	K14611//solute carrier family 23 (nucleobase transporter), member 1/2	NA	-1.106	gene
104899068	alkylated DNA repair protein alkB homolog 8	#N/A	GO:0016491//oxidoreductase activity	NA	K10770//alkylated DNA repair protein alkB homolog 8 [EC:1.14.11.- 2.1.1.229]	NA	2.08	gene
104899067	protein LOW PSII ACCUMULATION 1, chloroplastic	GO:0016021//integral component of membrane	NA	NA	NA	NA	4.591	gene
104899066	peptide chain release factor APG3, chloroplastic	GO:0009507//chloroplast	GO:0043022//ribosome binding;GO:0016149//translation release factor activity, codon specific	GO:0006415//translational termination;GO:0032544//plastid translation;GO:0009658//chloroplast organization;GO:0010027//thylakoid membrane organization	K02835//peptide chain release factor 1	NA	1.589	gene
104899065	spermatogenesis-associated protein 20	#N/A	GO:0003824//catalytic activity;GO:0003690//double-stranded DNA binding	GO:0006355//regulation of transcription, DNA-templated	K00943//dTMP kinase [EC:2.7.4.9]	NA	2.432	gene
104899010	CST complex subunit CTC1	#N/A	NA	GO:0000723//telomere maintenance	NA	NA	7.036	gene
104898989	exopolygalacturonase clone GBGE184-like	GO:0005576//extracellular region	GO:0004650//polygalacturonase activity	GO:0005975//carbohydrate metabolic process;GO:0071555//cell wall organization	K01213	NA	3.793	gene
104898979	uroporphyrinogen-III synthase, chloroplastic	#N/A	GO:0004852//uroporphyrinogen-III synthase activity	GO:0006782//protoporphyrinogen IX biosynthetic process;GO:0006780//uroporphyrinogen III biosynthetic process	K01719//uroporphyrinogen-III synthase [EC:4.2.1.75]	NA	-5.063	gene
104898960	metal tolerance protein 2	GO:0016021//integral component of membrane	GO:0008324//cation transmembrane transporter activity	NA	K14689//solute carrier family 30 (zinc transporter), member 2	NA	-3.602	gene
104898956	serine/arginine-rich-splicing factor SR34	#N/A	GO:0003723//RNA binding	NA	K12890//splicing factor, arginine/serine-rich 1	NA	2.179	gene
104898941	gamma-tubulin complex component 4	GO:0000922//spindle pole;GO:0005815//microtubule organizing center;GO:0005874//microtubule;GO:0005737//cytoplasm	GO:0043015//gamma-tubulin binding	GO:0007020//microtubule nucleation	K16571//gamma-tubulin complex component 4	0.7	4.689	both
104898938	zinc finger CCCH domain-containing protein 31	#N/A	GO:0046872//metal ion binding;GO:0005524//ATP binding;GO:0003676//nucleic acid binding	NA	K18995//ATP-dependent RNA helicase DHX29 [EC:3.6.4.13]	NA	1.423	gene
104898918	DUF21 domain-containing protein At1g47330	GO:0016021//integral component of membrane	NA	NA	K16302//metal transporter CNNM	NA	3.735	gene
104898909	exopolygalacturonase-like	GO:0005576//extracellular region	GO:0004650//polygalacturonase activity	GO:0005975//carbohydrate metabolic process;GO:0071555//cell wall organization	K01213	NA	-1.631	gene
104898891	probable methyltransferase PMT28	GO:0016021//integral component of membrane	GO:0008168//methyltransferase activity	NA	K15449//tRNA wybutosine-synthesizing protein 1 [EC:4.1.3.44]	NA	-5.784	gene
104898880	inactive protein kinase SELMODRAFT_444075-like	#N/A	GO:0004713//protein tyrosine kinase activity;GO:0005524//ATP binding	NA	K04733//interleukin-1 receptor-associated kinase 4 [EC:2.7.11.1]	-0.408	-5.874	both
104898876	WAT1-related protein At1g68170-like	GO:0016021//integral component of membrane	GO:0022857//transmembrane transporter activity	NA	K17500//integrin-linked kinase-associated serine/threonine phosphatase 2C [EC:3.1.3.16]	NA	2.495	gene
104898850	ankyrin repeat and IBR domain-containing protein 1	#N/A	GO:0046872//metal ion binding;GO:0004523//RNA-DNA hybrid ribonuclease activity;GO:0003676//nucleic acid binding;GO:0016874//ligase activity;GO:0004842//ubiquitin-protein transferase activity	NA	K11968//ariadne-1 [EC:2.3.2.31]	NA	3.336	gene
104898837	transmembrane protein 64	GO:0016021//integral component of membrane	NA	NA	K14638//solute carrier family 15 (peptide/histidine transporter), member 3/4	NA	5.135	gene
104898827	mediator of RNA polymerase II transcription subunit 33A-like	GO:0016592//mediator complex;GO:0016021//integral component of membrane	NA	GO:2000762//regulation of phenylpropanoid metabolic process	NA	NA	4.986	gene
104898820	probable E3 ubiquitin-protein ligase ARI2	NA	GO:0046872//metal ion binding;GO:0004842//ubiquitin-protein transferase activity	NA	K11968//ariadne-1 [EC:2.3.2.31]	NA	-2.359	gene
104898747	probable inactive heme oxygenase 2, chloroplastic	#N/A	GO:0004392//heme oxygenase (decyclizing) activity	GO:0006788//heme oxidation	K21480//heme oxygenase (biliverdin-producing, ferredoxin) [EC:1.14.15.20]	NA	-2.285	gene
104898726	ubiquitin carboxyl-terminal hydrolase 5	NA	GO:0004843//thiol-dependent ubiquitin-specific protease activity	GO:0006511//ubiquitin-dependent protein catabolic process;GO:0016579//protein deubiquitination	K21343//ubiquitin carboxyl-terminal hydrolase 15 [EC:3.4.19.12]	NA	-2.439	gene
104898674	isocitrate dehydrogenase [NAD] catalytic subunit 5, mitochondrial-like	GO:0005739//mitochondrion	GO:0000287//magnesium ion binding;GO:0004449//isocitrate dehydrogenase (NAD+) activity;GO:0051287//NAD binding	GO:0006099//tricarboxylic acid cycle	K00030//isocitrate dehydrogenase (NAD+) [EC:1.1.1.41]	NA	2.704	gene
104898653	leishmanolysin-like peptidase	GO:0016021//integral component of membrane;GO:0005737//cytoplasm	GO:0008233//peptidase activity;GO:0004222//metalloendopeptidase activity	GO:0007155//cell adhesion	K01404	NA	1.088	gene
104898644	histidine--tRNA ligase, cytoplasmic	GO:0005737//cytoplasm	GO:0004821//histidine-tRNA ligase activity;GO:0005524//ATP binding	GO:0006427//histidyl-tRNA aminoacylation	K01892//histidyl-tRNA synthetase [EC:6.1.1.21]	NA	-2.9	gene
104898634	lysophospholipid acyltransferase LPEAT1	GO:0016021//integral component of membrane	GO:0016746//transferase activity, transferring acyl groups	NA	K13510//lysophosphatidylcholine acyltransferase / lyso-PAF acetyltransferase [EC:2.3.1.23 2.3.1.67]	NA	2.615	gene
104898631	5'-nucleotidase domain-containing protein 4	#N/A	GO:0046872//metal ion binding	NA	K11339//mortality factor 4-like protein 1;K14175;K01081//5'-nucleotidase [EC:3.1.3.5]	NA	-4.5	gene
104898607	transmembrane protein 147	GO:0016021//integral component of membrane	NA	NA	NA	NA	2.324	gene
104898559	lysine histidine transporter-like 8	GO:0016021//integral component of membrane;GO:0005886//plasma membrane	GO:0015171//amino acid transmembrane transporter activity	GO:0003333//amino acid transmembrane transport	K19476//vacuolar protein sorting-associated protein IST1;K14209//solute carrier family 36 (proton-coupled amino acid transporter);K15015//solute carrier family 32 (vesicular inhibitory amino acid transporter)	NA	1.539	gene
104898549	pentatricopeptide repeat-containing protein At5g03800-like	#N/A	GO:0008270//zinc ion binding	NA	K06180;K22565//COMM domain containing 9	NA	-2.912	gene
104898547	auxin-binding protein ABP19a-like	GO:0048046//apoplast;GO:0005618//cell wall	GO:0045735//nutrient reservoir activity;GO:0030145//manganese ion binding	NA	NA	3.08	NA	promoter
104898544	pentatricopeptide repeat-containing protein At5g03800	#N/A	GO:0008270//zinc ion binding	NA	K17710//pentatricopeptide repeat domain-containing protein 1	-1.047	NA	promoter
104898543	probable glycosyltransferase At5g03795	GO:0016021//integral component of membrane	GO:0016757//transferase activity, transferring glycosyl groups	GO:0006486//protein glycosylation	K18789	NA	2.245	gene
104898523	probable 3-deoxy-D-manno-octulosonic acid transferase, mitochondrial	GO:0016021//integral component of membrane	GO:0016740//transferase activity	NA	K02527	NA	-2.695	gene
104898514	vacuolar amino acid transporter 1	GO:0016021//integral component of membrane	NA	NA	K15015//solute carrier family 32 (vesicular inhibitory amino acid transporter)	NA	-3.391	gene
104898495	enolase	GO:0000015//phosphopyruvate hydratase complex	GO:0000287//magnesium ion binding;GO:0004634//phosphopyruvate hydratase activity	GO:0006096//glycolytic process	K01689//enolase [EC:4.2.1.11]	-1.278	NA	promoter
104898492	histone deacetylase HDT1-like	#N/A	GO:0032041//NAD-dependent histone deacetylase activity (H3-K14 specific);GO:0003676//nucleic acid binding	NA	K14826//FK506-binding nuclear protein [EC:5.2.1.8];K11276//nucleophosmin 1	NA	1.113	gene
104898488	serine/threonine-protein kinase CTR1	#N/A	GO:0005524//ATP binding;GO:0004672//protein kinase activity	NA	K14510	NA	-1.897	gene
104898399	probable fructose-bisphosphate aldolase 3, chloroplastic	NA	GO:0004332//fructose-bisphosphate aldolase activity	GO:0006096//glycolytic process	K01623//fructose-bisphosphate aldolase, class I [EC:4.1.2.13]	NA	-4.506	gene
104898384	purple acid phosphatase 22-like	#N/A	GO:0046872//metal ion binding;GO:0003993//acid phosphatase activity	NA	K22390//acid phosphatase type 7	NA	-1.858	gene
104898379	ethylene receptor	GO:0016021//integral component of membrane;GO:0005789//endoplasmic reticulum membrane	GO:0000155//phosphorelay sensor kinase activity;GO:0051740//ethylene binding;GO:0046872//metal ion binding;GO:0005524//ATP binding;GO:0038199//ethylene receptor activity	NA	K14509	-1.127	NA	promoter
104898371	protein ABSCISIC ACID-INSENSITIVE 5-like	GO:0005634//nucleus	GO:0003700//DNA-binding transcription factor activity	GO:0009737//response to abscisic acid;GO:0045893//positive regulation of transcription, DNA-templated	K14432//ABA responsive element binding factor	NA	-2.145	gene
104898366	cytochrome b-c1 complex subunit 9	GO:0005750//mitochondrial respiratory chain complex III	NA	GO:0034551//mitochondrial respiratory chain complex III assembly;GO:0009060//aerobic respiration;GO:0006122//mitochondrial electron transport, ubiquinol to cytochrome c	K00419//ubiquinol-cytochrome c reductase subunit 9	NA	3.457	gene
104898356	alpha carbonic anhydrase 1, chloroplastic-like	#N/A	GO:0008270//zinc ion binding;GO:0004089//carbonate dehydratase activity	NA	K01674//carbonic anhydrase [EC:4.2.1.1]	NA	4.192	gene
104898352	heterogeneous nuclear ribonucleoprotein Q	#N/A	GO:0003723//RNA binding	NA	K13161//heterogeneous nuclear ribonucleoprotein R;K11323//histone arginine demethylase JMJD6 [EC:1.14.11.-]	NA	3.592	gene
104898351	UDP-N-acetylglucosamine diphosphorylase 1-like	#N/A	GO:0070569//uridylyltransferase activity	NA	K00972//UDP-N-acetylglucosamine/UDP-N-acetylgalactosamine diphosphorylase [EC:2.7.7.23 2.7.7.83]	NA	4.314	gene
104898344	probable small nuclear ribonucleoprotein G	GO:0005681//spliceosomal complex	GO:0003723//RNA binding	GO:0000387//spliceosomal snRNP assembly	K11099//small nuclear ribonucleoprotein G	1.623	NA	promoter
104898340	beta-fructofuranosidase, insoluble isoenzyme 1	#N/A	GO:0004553//hydrolase activity, hydrolyzing O-glycosyl compounds	GO:0005975//carbohydrate metabolic process	K01193//beta-fructofuranosidase [EC:3.2.1.26]	NA	-1.837	gene
104898308	peptidyl-prolyl cis-trans isomerase CYP18-2	NA	GO:0003755//peptidyl-prolyl cis-trans isomerase activity	GO:0006457//protein folding	K12733//peptidyl-prolyl cis-trans isomerase-like 1 [EC:5.2.1.8]	NA	6.669	gene
104898305	protein SRG1-like	#N/A	GO:0046872//metal ion binding;GO:0016491//oxidoreductase activity	NA	K05278//flavonol synthase [EC:1.14.20.6]	NA	-2.512	gene
104898284	B3 domain-containing protein At2g36080-like	GO:0005634//nucleus	GO:0003677//DNA binding	NA	K09287//RAV-like factor	NA	1.382	gene
104898271	TLD domain-containing protein 1	NA	GO:0005509//calcium ion binding	NA	NA	NA	-3.499	gene
104898259	aspartic proteinase nepenthesin-1	NA	GO:0004190//aspartic-type endopeptidase activity	NA	K01379//cathepsin D [EC:3.4.23.5];K01381//saccharopepsin [EC:3.4.23.25]	-1.241	NA	promoter
104898249	protein transport protein SEC23-like	GO:0030127//COPII vesicle coat;GO:0005789//endoplasmic reticulum membrane;GO:0000139//Golgi membrane	GO:0008270//zinc ion binding	GO:0006886//intracellular protein transport;GO:0090114//COPII-coated vesicle budding	K14006//protein transport protein SEC23	NA	-3.447	gene
104898246	aldose reductase	GO:0005829//cytosol	GO:0004032//alditol:NADP+ 1-oxidoreductase activity;GO:0008106//alcohol dehydrogenase (NADP+) activity;GO:0016491//oxidoreductase activity	NA	K00002//alcohol dehydrogenase (NADP+) [EC:1.1.1.2]	NA	-2.028	gene
104898237	protein MOS2	#N/A	GO:0003676//nucleic acid binding	NA	K13101//G patch domain and KOW motifs-containing protein	1.64	NA	promoter
104898221	magnesium transporter MRS2-1	GO:0016021//integral component of membrane	NA	GO:0006811//ion transport	K16075//magnesium transporter	NA	2.133	gene
104898219	chitin elicitor receptor kinase 1-like	GO:0016021//integral component of membrane	GO:0005524//ATP binding;GO:0004672//protein kinase activity	NA	K13429	-3.69	NA	promoter
104898214	regulatory-associated protein of TOR 1	GO:0031931//TORC1 complex	NA	GO:0031929//TOR signaling	K07204//regulatory associated protein of mTOR	NA	-1.473	gene
104898202	probable terpene synthase 6	#N/A	GO:0000287//magnesium ion binding;GO:0010333//terpene synthase activity	NA	K18117;K15803	NA	-3.473	gene
104898197	probable glycosyltransferase At3g07620	GO:0016021//integral component of membrane	GO:0016757//transferase activity, transferring glycosyl groups	GO:0006486//protein glycosylation	K18789	-1.35	NA	promoter
104898178	serine/threonine-protein kinase HT1	#N/A	GO:0004674//protein serine/threonine kinase activity;GO:0005524//ATP binding	NA	K04427//mitogen-activated protein kinase kinase kinase 7 [EC:2.7.11.25];K17535//serine/threonine-protein kinase TNNI3K [EC:2.7.11.1]	2.294	NA	promoter
104898166	probable disease resistance protein At1g58602	#N/A	GO:0043531//ADP binding;GO:0005524//ATP binding	GO:0006952//defense response	K13457	NA	-3.678	gene
104898157	B3 domain-containing transcription repressor VAL2-like	GO:0005634//nucleus	GO:0003677//DNA binding;GO:0008270//zinc ion binding	NA	K09287//RAV-like factor	NA	1.323	gene
104898152	probably inactive leucine-rich repeat receptor-like protein kinase At3g28040	GO:0016021//integral component of membrane	GO:0005524//ATP binding;GO:0004672//protein kinase activity	NA	K04733//interleukin-1 receptor-associated kinase 4 [EC:2.7.11.1]	4.797	NA	promoter
104898120	acetyltransferase NSI	#N/A	GO:0008080//N-acetyltransferase activity	NA	K22450	3.652	NA	promoter
104898117	probable LRR receptor-like serine/threonine-protein kinase At1g06840	GO:0016021//integral component of membrane	GO:0004674//protein serine/threonine kinase activity;GO:0005524//ATP binding	NA	K04733//interleukin-1 receptor-associated kinase 4 [EC:2.7.11.1]	-0.491	-4.647	both
104898105	2,3-bisphosphoglycerate-independent phosphoglycerate mutase	GO:0005737//cytoplasm	GO:0004619//phosphoglycerate mutase activity;GO:0030145//manganese ion binding	GO:0006007//glucose catabolic process	K15633//2,3-bisphosphoglycerate-independent phosphoglycerate mutase [EC:5.4.2.12]	NA	2.302	gene
104898104	xyloglucan galactosyltransferase KATAMARI1 homolog	GO:0016021//integral component of membrane	GO:0016757//transferase activity, transferring glycosyl groups	GO:0006486//protein glycosylation	K20888//xyloglucan galactosyltransferase MUR3 [EC:2.4.1.-]	NA	-3.213	gene
104898039	microtubule-associated protein TORTIFOLIA1-like	GO:0005874//microtubule	GO:0008017//microtubule binding	NA	NA	NA	-2.484	gene
104898034	pyruvate dehydrogenase E1 component subunit alpha, mitochondrial	GO:0043231//intracellular membrane-bounded organelle	GO:0004739//pyruvate dehydrogenase (acetyl-transferring) activity	GO:0006086//acetyl-CoA biosynthetic process from pyruvate	K00161//pyruvate dehydrogenase E1 component alpha subunit [EC:1.2.4.1]	NA	21.501	gene
104898022	zinc finger MYND domain-containing protein 15	#N/A	GO:0046872//metal ion binding	NA	NA	NA	3.105	gene
104898014	probable beta-1,3-galactosyltransferase 19	GO:0005794//Golgi apparatus;GO:0016021//integral component of membrane	GO:0030246//carbohydrate binding;GO:0016757//transferase activity, transferring glycosyl groups	GO:0006486//protein glycosylation	K20843	NA	1.208	gene
104898011	HIPL1 protein-like	NA	GO:0003824//catalytic activity	NA	NA	NA	-1.457	gene
104898010	regulator of nonsense transcripts UPF3	#N/A	GO:0003676//nucleic acid binding	GO:0000184//nuclear-transcribed mRNA catabolic process, nonsense-mediated decay	K14328//regulator of nonsense transcripts 3	NA	-3.276	gene
104898003	probable serine/threonine-protein kinase At1g18390	GO:0016021//integral component of membrane	GO:0005524//ATP binding;GO:0004672//protein kinase activity	NA	K04733//interleukin-1 receptor-associated kinase 4 [EC:2.7.11.1]	NA	-1.235	gene
104897999	dnaJ homolog subfamily B member 4-like	NA	GO:0051082//unfolded protein binding	GO:0006457//protein folding	K09510//DnaJ homolog subfamily B member 4	NA	1.406	gene
104897993	AMP deaminase-like	GO:0016021//integral component of membrane	GO:0003876//AMP deaminase activity	GO:0032264//IMP salvage	K01490//AMP deaminase [EC:3.5.4.6]	-5.426	NA	promoter
104897991	MATE efflux family protein DTX1-like	GO:0016020//membrane;GO:0016021//integral component of membrane	GO:0015297//antiporter activity;GO:0042910//xenobiotic transmembrane transporter activity;GO:0022857//transmembrane transporter activity	NA	K03327//multidrug resistance protein, MATE family	-2.529	18.723	both
104897983	protein NRT1/ PTR FAMILY 4.6-like	GO:0016021//integral component of membrane	GO:0022857//transmembrane transporter activity	NA	K14638//solute carrier family 15 (peptide/histidine transporter), member 3/4	NA	-1.402	gene
104897956	UDP-galactose/UDP-glucose transporter 3	GO:0016021//integral component of membrane	NA	GO:0055085//transmembrane transport	K15275//solute carrier family 35 (UDP-galactose transporter), member B1	NA	1.368	gene
104897949	homeobox-leucine zipper protein ATHB-13	GO:0005634//nucleus	GO:0043565//sequence-specific DNA binding	GO:0006355//regulation of transcription, DNA-templated	K09338//homeobox-leucine zipper protein	1.505	NA	promoter
104897937	haloacid dehalogenase-like hydrolase domain-containing protein 3	#N/A	GO:0016787//hydrolase activity;GO:0008253//5'-nucleotidase activity	NA	K01082//3'(2'), 5'-bisphosphate nucleotidase [EC:3.1.3.7]	-2.065	-0.832	both
104897929	protein PHYTOCHROME KINASE SUBSTRATE 1	#N/A	NA	GO:0009638//phototropism	NA	-1.382	NA	promoter
104897920	interaptin-like	GO:0016021//integral component of membrane	NA	NA	NA	NA	1.072	gene
104897903	probable serine/threonine-protein kinase At1g54610	NA	GO:0005524//ATP binding;GO:0004672//protein kinase activity	NA	K08819//cyclin-dependent kinase 12/13 [EC:2.7.11.22 2.7.11.23]	NA	2.388	gene
104897894	ABC transporter C family member 2-like	GO:0016021//integral component of membrane	GO:0005524//ATP binding;GO:0042626//ATPase-coupled transmembrane transporter activity;GO:0016887//ATPase activity	NA	K05666//ATP-binding cassette, subfamily C (CFTR/MRP), member 2	NA	2.058	gene
104897892	3-ketoacyl-CoA synthase 11-like	GO:0016021//integral component of membrane	GO:0016747//transferase activity, transferring acyl groups other than amino-acyl groups	GO:0006633//fatty acid biosynthetic process	K15397//3-ketoacyl-CoA synthase [EC:2.3.1.199]	NA	1.989	gene
104897884	glycine-rich RNA-binding protein 4, mitochondrial	NA	GO:0003723//RNA binding	NA	K13195//cold-inducible RNA-binding protein	NA	-1.531	gene
104897883	expansin-A10-like	GO:0016020//membrane;GO:0005618//cell wall;GO:0005576//extracellular region	NA	GO:0009664//plant-type cell wall organization	K20628//expansin	NA	2.367	gene
104897864	fructose-bisphosphate aldolase-lysine N-methyltransferase, chloroplastic	GO:0009507//chloroplast	GO:0030785//[ribulose-bisphosphate carboxylase]-lysine N-methyltransferase activity;GO:0018024//histone-lysine N-methyltransferase activity	NA	K00592	2.066	NA	promoter
104897852	pre-mRNA-splicing factor SYF1	#N/A	NA	GO:0006396//RNA processing	K12867//pre-mRNA-splicing factor SYF1	-1.872	NA	promoter
104897844	germin-like protein subfamily 1 member 13	GO:0048046//apoplast;GO:0005618//cell wall	GO:0045735//nutrient reservoir activity;GO:0030145//manganese ion binding	NA	K00384	-1.313	NA	promoter
104897815	phosphoenolpyruvate carboxykinase [ATP]	#N/A	GO:0005524//ATP binding;GO:0004612//phosphoenolpyruvate carboxykinase (ATP) activity	GO:0006094//gluconeogenesis	K01610//phosphoenolpyruvate carboxykinase (ATP) [EC:4.1.1.49]	NA	4.508	gene
104897788	probable prolyl 4-hydroxylase 10	GO:0016021//integral component of membrane	GO:0016705//oxidoreductase activity, acting on paired donors, with incorporation or reduction of molecular oxygen;GO:0005506//iron ion binding;GO:0031418//L-ascorbic acid binding	NA	K00472//prolyl 4-hydroxylase [EC:1.14.11.2]	NA	4.255	gene
104897781	C-type lectin receptor-like tyrosine-protein kinase At1g52310	GO:0016021//integral component of membrane	GO:0004713//protein tyrosine kinase activity;GO:0005524//ATP binding	NA	K04733//interleukin-1 receptor-associated kinase 4 [EC:2.7.11.1]	NA	1.167	gene
104897777	GPI mannosyltransferase 1	GO:0016021//integral component of membrane;GO:0005789//endoplasmic reticulum membrane	GO:0016758//transferase activity, transferring hexosyl groups	GO:0006506//GPI anchor biosynthetic process	K05284//phosphatidylinositol glycan, class M [EC:2.4.1.-]	3.8	NA	promoter
104897756	chalcone synthase-like	NA	GO:0016747//transferase activity, transferring acyl groups other than amino-acyl groups	GO:0009058//biosynthetic process	K00660	NA	-1.836	gene
104897755	caffeic acid 3-O-methyltransferase-like	NA	GO:0008171//O-methyltransferase activity;GO:0046983//protein dimerization activity	GO:0032259//methylation	K13066//caffeic acid 3-O-methyltransferase [EC:2.1.1.68]	-0.278	3.19	both
104897719	alpha-mannosidase	GO:0005774//vacuolar membrane	GO:0046872//metal ion binding;GO:0030246//carbohydrate binding;GO:0004559//alpha-mannosidase activity	GO:0006013//mannose metabolic process;GO:0006517//protein deglycosylation	K01191//alpha-mannosidase [EC:3.2.1.24]	3.807	NA	promoter
104897716	putative beta-glucosidase 6	#N/A	GO:0004553//hydrolase activity, hydrolyzing O-glycosyl compounds	GO:0005975//carbohydrate metabolic process	K01188//beta-glucosidase [EC:3.2.1.21]	NA	19.207	gene
104897673	GDSL esterase/lipase 7-like	#N/A	GO:0016298//lipase activity;GO:0016788//hydrolase activity, acting on ester bonds	GO:0006629//lipid metabolic process	K10691//E3 ubiquitin-protein ligase UBR4 [EC:2.3.2.27];K14209//solute carrier family 36 (proton-coupled amino acid transporter);K01188//beta-glucosidase [EC:3.2.1.21];K00679;K01206//alpha-L-fucosidase [EC:3.2.1.51]	NA	4.391	gene
104897651	chalcone synthase	NA	GO:0016747//transferase activity, transferring acyl groups other than amino-acyl groups	GO:0009058//biosynthetic process	K00660	NA	-1.605	gene
104897646	probable thimet oligopeptidase	GO:0016021//integral component of membrane	GO:0046872//metal ion binding;GO:0004222//metalloendopeptidase activity	NA	K01392//thimet oligopeptidase [EC:3.4.24.15]	NA	3.837	gene
104897637	glyceraldehyde-3-phosphate dehydrogenase, cytosolic	NA	GO:0016620//oxidoreductase activity, acting on the aldehyde or oxo group of donors, NAD or NADP as acceptor;GO:0050661//NADP binding;GO:0051287//NAD binding	GO:0006006//glucose metabolic process	K00134//glyceraldehyde 3-phosphate dehydrogenase [EC:1.2.1.12]	NA	2.513	gene
104897634	lysine histidine transporter-like 2	GO:0016021//integral component of membrane	NA	NA	K14209//solute carrier family 36 (proton-coupled amino acid transporter);K15015//solute carrier family 32 (vesicular inhibitory amino acid transporter)	1.772	0.767	both
104897633	DNA polymerase alpha subunit B	#N/A	GO:0003677//DNA binding	GO:0006260//DNA replication	K02321//DNA polymerase alpha subunit B	NA	-1.095	gene
104897631	3-oxoacyl-[acyl-carrier-protein] reductase 4	GO:0009507//chloroplast	GO:0004316//3-oxoacyl-[acyl-carrier-protein] reductase (NADPH) activity;GO:0102131//3-oxo-glutaryl-[acp] methyl ester reductase activity;GO:0051287//NAD binding;GO:0102132//3-oxo-pimeloyl-[acp] methyl ester reductase activity	GO:0006633//fatty acid biosynthetic process	K00059//3-oxoacyl-[acyl-carrier protein] reductase [EC:1.1.1.100]	NA	6.088	gene
104897615	urease	#N/A	GO:0009039//urease activity;GO:0016151//nickel cation binding	GO:0043419//urea catabolic process	K01427//urease [EC:3.5.1.5]	NA	1.084	gene
104897579	endoplasmic reticulum metallopeptidase 1	GO:0016021//integral component of membrane	NA	NA	K12599//antiviral helicase SKI2 [EC:3.6.4.-]	0.79	1.868	both
104897568	inositol-tetrakisphosphate 1-kinase 1-like	#N/A	GO:0000287//magnesium ion binding;GO:0052725//inositol-1,3,4-trisphosphate 6-kinase activity;GO:0005524//ATP binding;GO:0052726//inositol-1,3,4-trisphosphate 5-kinase activity;GO:0047325//inositol tetrakisphosphate 1-kinase activity	GO:0032957//inositol trisphosphate metabolic process	K00913//inositol-1,3,4-trisphosphate 5/6-kinase / inositol-tetrakisphosphate 1-kinase [EC:2.7.1.159 2.7.1.134]	-2.466	NA	promoter
104897553	4-coumarate--CoA ligase-like 1	#N/A	GO:0003824//catalytic activity	NA	K01904//4-coumarate--CoA ligase [EC:6.2.1.12]	NA	18.599	gene
104897544	calmodulin-binding transcription activator 4	#N/A	GO:0003677//DNA binding	NA	K21596//calmodulin-binding transcription activator	NA	-2.278	gene
104897536	probable DNA primase large subunit	GO:0005658//alpha DNA polymerase:primase complex	GO:0046872//metal ion binding;GO:0051539//4 iron, 4 sulfur cluster binding	GO:0006269//DNA replication, synthesis of RNA primer	K02685//DNA primase large subunit	NA	5.821	gene
104897489	transcription factor bHLH66-like	#N/A	GO:0046983//protein dimerization activity	NA	K16189;K12126	NA	1.732	gene
104897478	probable serine/threonine-protein kinase yakA	GO:0016021//integral component of membrane	GO:0005524//ATP binding;GO:0004386//helicase activity	NA	K16277;K12813//pre-mRNA-splicing factor ATP-dependent RNA helicase DHX16 [EC:3.6.4.13]	NA	2.97	gene
104897476	transcription factor BEE 2-like	#N/A	GO:0046983//protein dimerization activity	GO:0006355//regulation of transcription, DNA-templated	K16189;K04733//interleukin-1 receptor-associated kinase 4 [EC:2.7.11.1];K11253//histone H3	NA	-1.367	gene
104897458	histone-lysine N-methyltransferase, H3 lysine-9 specific SUVH4-like	GO:0005634//nucleus;GO:0005694//chromosome	GO:0008270//zinc ion binding;GO:0018024//histone-lysine N-methyltransferase activity	NA	K11420//euchromatic histone-lysine N-methyltransferase [EC:2.1.1.43]	NA	5.816	gene
104897455	ubiquitin thioesterase otubain-like	GO:0005634//nucleus	GO:0043130//ubiquitin binding;GO:0004843//thiol-dependent ubiquitin-specific protease activity;GO:0019784//NEDD8-specific protease activity;GO:0016787//hydrolase activity	GO:0071108//protein K48-linked deubiquitination;GO:0016579//protein deubiquitination	K09602//ubiquitin thioesterase protein OTUB1 [EC:3.4.19.12]	NA	3.899	gene
104897418	AP-1 complex subunit gamma-2-like	GO:0030121//AP-1 adaptor complex	NA	GO:0006886//intracellular protein transport;GO:0016192//vesicle-mediated transport	K12391//AP-1 complex subunit gamma-1	NA	3.794	gene
104897417	NHL repeat-containing protein 2	GO:0016021//integral component of membrane	NA	NA	K03549//KUP system potassium uptake protein;K11593//eukaryotic translation initiation factor 2C	1.139	NA	promoter
104897412	putative potassium transporter 12	GO:0016021//integral component of membrane	GO:0015079//potassium ion transmembrane transporter activity	NA	K03549//KUP system potassium uptake protein	NA	2.394	gene
104897408	U4/U6 small nuclear ribonucleoprotein Prp31-like	GO:0046540//U4/U6 x U5 tri-snRNP complex	NA	GO:0000244//spliceosomal tri-snRNP complex assembly	K12844//U4/U6 small nuclear ribonucleoprotein PRP31	NA	2.553	gene
104897398	ubiquitin-like-specific protease 1D	#N/A	GO:0008234//cysteine-type peptidase activity	NA	K16287	2.141	-4.359	both
104897374	phosphatidylinositol 3-kinase, root isoform	NA	GO:0005524//ATP binding;GO:0016303//1-phosphatidylinositol-3-kinase activity	GO:0048015//phosphatidylinositol-mediated signaling	K00914//phosphatidylinositol 3-kinase [EC:2.7.1.137]	NA	-4.317	gene
104897373	putative receptor protein kinase ZmPK1	GO:0016021//integral component of membrane	GO:0004674//protein serine/threonine kinase activity;GO:0005524//ATP binding	GO:0048544//recognition of pollen	K04733//interleukin-1 receptor-associated kinase 4 [EC:2.7.11.1]	NA	5.864	gene
104897370	pentatricopeptide repeat-containing protein At3g13880	NA	GO:0004650//polygalacturonase activity	GO:0005975//carbohydrate metabolic process	K01176//alpha-amylase [EC:3.2.1.1];K17710//pentatricopeptide repeat domain-containing protein 1	NA	-1.235	gene
104897356	protein trichome birefringence-like 2	GO:0016021//integral component of membrane	NA	NA	NA	NA	-2.14	gene
104897284	ABC transporter B family member 26, chloroplastic	GO:0016021//integral component of membrane	GO:0005524//ATP binding;GO:0042626//ATPase-coupled transmembrane transporter activity;GO:0016887//ATPase activity	NA	K05656//ATP-binding cassette, subfamily B (MDR/TAP), member 9	NA	2.658	gene
104897226	protein TIC 20-I, chloroplastic	GO:0016021//integral component of membrane;GO:0031969//chloroplast membrane	NA	NA	NA	NA	1.351	gene
104897210	protein GLE1	GO:0005643//nuclear pore	NA	GO:0016973//poly(A)+ mRNA export from nucleus	K18723//nucleoporin GLE1	NA	3.888	gene
104897135	4-diphosphocytidyl-2-C-methyl-D-erythritol kinase, chloroplastic	NA	GO:0005524//ATP binding;GO:0050515//4-(cytidine 5'-diphospho)-2-C-methyl-D-erythritol kinase activity	GO:0016114//terpenoid biosynthetic process	K00919	NA	1.334	gene
104897101	probable diphthine synthase	#N/A	GO:0004164//diphthine synthase activity	GO:0017183//peptidyl-diphthamide biosynthetic process from peptidyl-histidine;GO:0032259//methylation	K00586//diphthine methyl ester synthase [EC:2.1.1.314]	NA	3.493	gene
104897085	MLO-like protein 13	GO:0016021//integral component of membrane	GO:0005516//calmodulin binding	GO:0006952//defense response;GO:0009607//response to biotic stimulus	K08472//mlo protein	NA	5.662	gene
104897083	T-complex protein 1 subunit alpha	GO:0005737//cytoplasm	GO:0005524//ATP binding;GO:0051082//unfolded protein binding	GO:0006457//protein folding	K09493//T-complex protein 1 subunit alpha	NA	2.195	gene
104897080	DNA repair helicase UVH6	GO:0005634//nucleus	GO:0003684//damaged DNA binding;GO:0005524//ATP binding;GO:0003678//DNA helicase activity	GO:0009411//response to UV;GO:0006468//protein phosphorylation;GO:0000717//nucleotide-excision repair, DNA duplex unwinding;GO:0006366//transcription by RNA polymerase II;GO:0045893//positive regulation of transcription, DNA-templated;GO:0006979//response to oxidative stress;GO:0000019//regulation of mitotic recombination;GO:0033683//nucleotide-excision repair, DNA incision;GO:0045951//positive r…	K10844//DNA excision repair protein ERCC-2 [EC:3.6.4.12]	NA	1.534	gene
104897026	ATP-dependent RNA helicase SUPV3L1, mitochondrial	NA	GO:0016817//hydrolase activity, acting on acid anhydrides	NA	K17675//ATP-dependent RNA helicase SUPV3L1/SUV3 [EC:3.6.4.13]	NA	-2.285	gene
104897021	superkiller viralicidic activity 2-like 2	#N/A	GO:0003723//RNA binding;GO:0005524//ATP binding;GO:0003724//RNA helicase activity	GO:0006401//RNA catabolic process	K12598//ATP-dependent RNA helicase DOB1 [EC:3.6.4.13]	NA	5.973	gene
104897016	survival of motor neuron-related-splicing factor 30	GO:0005634//nucleus;GO:0005737//cytoplasm	GO:0003723//RNA binding	GO:0006397//mRNA processing	K12839//survival of motor neuron-related-splicing factor 30	NA	3.358	gene
104897012	ATP-dependent Clp protease ATP-binding subunit clpX-like, mitochondrial	#N/A	GO:0005524//ATP binding;GO:0051082//unfolded protein binding	GO:0006457//protein folding	K03544//ATP-dependent Clp protease ATP-binding subunit ClpX	NA	-3.225	gene
104897010	cullin-associated NEDD8-dissociated protein 1	GO:0005634//nucleus	NA	GO:0010265//SCF complex assembly;GO:0016567//protein ubiquitination	K17263//cullin-associated NEDD8-dissociated protein 1	NA	4.486	gene
104897005	squamous cell carcinoma antigen recognized by T-cells 3	#N/A	GO:0003723//RNA binding	GO:0006396//RNA processing	K22611//squamous cell carcinoma antigen recognized by T-cells 3	NA	-1.044	gene
104896996	NADH dehydrogenase [ubiquinone] 1 beta subcomplex subunit 3-B	GO:0016021//integral component of membrane;GO:0005739//mitochondrion	NA	GO:0022900//electron transport chain	K03959//NADH dehydrogenase (ubiquinone) 1 beta subcomplex subunit 3	NA	1.884	gene
104896986	tetraketide alpha-pyrone reductase 1	#N/A	GO:0008289//lipid binding;GO:0003824//catalytic activity	NA	K09753//cinnamoyl-CoA reductase [EC:1.2.1.44]	NA	-2.177	gene
104896950	protein FAR1-RELATED SEQUENCE 11	#N/A	GO:0008270//zinc ion binding	GO:0006355//regulation of transcription, DNA-templated	K17604//zinc finger SWIM domain-containing protein 3	NA	3.261	gene
104896932	tRNA pseudouridine synthase-like 1	#N/A	GO:0003723//RNA binding;GO:0106029//tRNA pseudouridine synthase activity	GO:0001522//pseudouridine synthesis;GO:0008033//tRNA processing	K06173//tRNA pseudouridine38-40 synthase [EC:5.4.99.12]	NA	21.678	gene
104896931	shaggy-related protein kinase kappa	#N/A	GO:0004674//protein serine/threonine kinase activity;GO:0005524//ATP binding	NA	K03083//glycogen synthase kinase 3 beta [EC:2.7.11.26]	NA	21.226	gene
104896904	probable phenylalanine--tRNA ligase beta subunit	GO:0005737//cytoplasm	GO:0000287//magnesium ion binding;GO:0003723//RNA binding;GO:0004826//phenylalanine-tRNA ligase activity;GO:0005524//ATP binding	GO:0006432//phenylalanyl-tRNA aminoacylation	K01890//phenylalanyl-tRNA synthetase beta chain [EC:6.1.1.20]	NA	3.724	gene
104896903	serine carboxypeptidase-like	#N/A	GO:0004185//serine-type carboxypeptidase activity	NA	K16298//serine carboxypeptidase-like clade IV [EC:3.4.16.-]	NA	-3.381	gene
104896899	ATP-dependent RNA helicase Dhx29	GO:0016021//integral component of membrane	GO:0005524//ATP binding;GO:0004386//helicase activity;GO:0003676//nucleic acid binding	NA	K18995//ATP-dependent RNA helicase DHX29 [EC:3.6.4.13]	NA	-3.065	gene
104896897	phosphoinositide phosphatase SAC1	#N/A	GO:0042578//phosphoric ester hydrolase activity	NA	K22913//phosphatidylinositol 3,5-bisphosphate 5-phosphatase [EC:3.1.3.-]	NA	-1.887	gene
104896859	THO complex subunit 2	GO:0000347//THO complex	NA	GO:0006397//mRNA processing;GO:0006406//mRNA export from nucleus	K12879//THO complex subunit 2	NA	5.206	gene
104896822	21 kDa protein-like	NA	GO:0004857//enzyme inhibitor activity	NA	K01051//pectinesterase [EC:3.1.1.11]	-2.444	NA	promoter
104896820	phosphoglucomutase, cytoplasmic	GO:0005737//cytoplasm	GO:0000287//magnesium ion binding;GO:0004614//phosphoglucomutase activity;GO:0016868//intramolecular transferase activity, phosphotransferases	GO:0006006//glucose metabolic process;GO:0005975//carbohydrate metabolic process	K01835//phosphoglucomutase [EC:5.4.2.2]	NA	-5.946	gene
104896818	protein mago nashi homolog	GO:0005730//nucleolus;GO:0016607//nuclear speck;GO:0035145//exon-exon junction complex	NA	GO:0010183//pollen tube guidance;GO:0008380//RNA splicing;GO:0010628//positive regulation of gene expression;GO:0009793//embryo development ending in seed dormancy	K12877//protein mago nashi	NA	-2.145	gene
104896815	putative clathrin assembly protein At2g01600	GO:0030136//clathrin-coated vesicle	GO:0030276//clathrin binding;GO:0005545//1-phosphatidylinositol binding	GO:0048268//clathrin coat assembly	K20043//clathrin coat assembly protein AP180	NA	-6.786	gene
104896810	serine/threonine-protein kinase rio2	#N/A	GO:0004674//protein serine/threonine kinase activity;GO:0005524//ATP binding	NA	K07179//RIO kinase 2 [EC:2.7.11.1]	NA	-3.321	gene
104896796	cell division control protein 48 homolog C-like	#N/A	GO:0005524//ATP binding	GO:0051301//cell division	K14571//ribosome biogenesis ATPase	NA	18.957	gene
104896788	DELLA protein GAI-like	GO:0005634//nucleus	GO:0003712//transcription coregulator activity	NA	K14494	1.874	NA	promoter
104896721	phosphatidylinositol 4-phosphate 5-kinase 8-like	#N/A	GO:0005524//ATP binding;GO:0016308//1-phosphatidylinositol-4-phosphate 5-kinase activity	NA	K00889//1-phosphatidylinositol-4-phosphate 5-kinase [EC:2.7.1.68]	NA	7.587	gene
104896714	protein TPLATE	#N/A	NA	GO:0006897//endocytosis	K17302//coatomer subunit beta'	NA	-1.967	gene
104896713	potassium channel AKT2/3	GO:0016021//integral component of membrane	GO:0005249//voltage-gated potassium channel activity	NA	K21867//potassium channel	NA	-3.701	gene
104896712	protein EI24 homolog	GO:0016021//integral component of membrane	NA	NA	K10134//etoposide-induced 2.4 mRNA	NA	-3.553	gene
104896709	ATP phosphoribosyltransferase 2, chloroplastic-like	GO:0005737//cytoplasm	GO:0000287//magnesium ion binding;GO:0003879//ATP phosphoribosyltransferase activity	GO:0000105//histidine biosynthetic process	K00765//ATP phosphoribosyltransferase [EC:2.4.2.17]	NA	2.323	gene
104896706	MLO-like protein 4	GO:0016021//integral component of membrane	GO:0005516//calmodulin binding	GO:0006952//defense response;GO:0009607//response to biotic stimulus	K08472//mlo protein	NA	-5.057	gene
104896702	nijmegen breakage syndrome 1 protein	GO:0030870//Mre11 complex	NA	GO:0006302//double-strand break repair;GO:0007095//mitotic G2 DNA damage checkpoint	K10867//nibrin	NA	5.154	gene
104896691	ras-related protein RABA2a	NA	GO:0005525//GTP binding;GO:0003924//GTPase activity	NA	K07904//Ras-related protein Rab-11A	-0.92	-1.849	both
104896690	U3 small nucleolar RNA-associated protein 21 homolog	GO:0034388//Pwp2p-containing subcomplex of 90S preribosome;GO:0032040//small-subunit processome	NA	GO:0006364//rRNA processing	K14554//U3 small nucleolar RNA-associated protein 21	NA	-3.12	gene
104896654	putative lipid phosphate phosphatase 3, chloroplastic	GO:0016021//integral component of membrane	GO:0008195//phosphatidate phosphatase activity	GO:0006644//phospholipid metabolic process	K18693//diacylglycerol diphosphate phosphatase / phosphatidate phosphatase [EC:3.1.3.81 3.1.3.4]	NA	-3.54	gene
104896652	lipid phosphate phosphatase 2-like	GO:0016021//integral component of membrane	GO:0008195//phosphatidate phosphatase activity	GO:0006644//phospholipid metabolic process	K18693//diacylglycerol diphosphate phosphatase / phosphatidate phosphatase [EC:3.1.3.81 3.1.3.4]	-0.889	4.111	both
104896632	fruit protein pKIWI502	#N/A	GO:0016491//oxidoreductase activity	NA	K20784//arabinosyltransferase [EC:2.4.2.-];K02641//ferredoxin--NADP+ reductase [EC:1.18.1.2]	NA	4.361	gene
104896621	xylosyltransferase 1	GO:0016020//membrane;GO:0005794//Golgi apparatus	NA	NA	K20891//beta-glucuronosyltransferase [EC:2.4.1.-]	3.796	NA	promoter
104896619	ABC transporter G family member 7	GO:0016021//integral component of membrane	GO:0005524//ATP binding;GO:0016887//ATPase activity	NA	K21396//ATP-binding cassette, subfamily G (WHITE), eye pigment precursor transporter	NA	2.709	gene
104896599	methionine aminopeptidase 1B, chloroplastic-like	NA	GO:0046872//metal ion binding;GO:0070006//metalloaminopeptidase activity	GO:0070084//protein initiator methionine removal	K01265//methionyl aminopeptidase [EC:3.4.11.18]	NA	1.601	gene
104896595	peroxidase 9-like	#N/A	GO:0046872//metal ion binding;GO:0020037//heme binding;GO:0004601//peroxidase activity	GO:0006979//response to oxidative stress;GO:0042744//hydrogen peroxide catabolic process	K00430//peroxidase [EC:1.11.1.7]	NA	-1.358	gene
104896573	probable protein phosphatase 2C 15	#N/A	GO:0004722//protein serine/threonine phosphatase activity	NA	K17500//integrin-linked kinase-associated serine/threonine phosphatase 2C [EC:3.1.3.16]	NA	3.827	gene
104896561	cyclin-dependent kinase C-2-like	#N/A	GO:0005524//ATP binding;GO:0004672//protein kinase activity	NA	K08819//cyclin-dependent kinase 12/13 [EC:2.7.11.22 2.7.11.23]	NA	6.06	gene
104896550	IST1 homolog	#N/A	NA	GO:0015031//protein transport	K19476//vacuolar protein sorting-associated protein IST1	NA	1.717	gene
104896535	peptidyl-prolyl cis-trans isomerase CYP59-like	GO:0005634//nucleus	GO:0003723//RNA binding;GO:0003755//peptidyl-prolyl cis-trans isomerase activity;GO:0008270//zinc ion binding	NA	K12735//peptidyl-prolyl cis-trans isomerase-like 4 [EC:5.2.1.8]	NA	1.783	gene
104896529	aluminum-activated malate transporter 4	GO:0016021//integral component of membrane	NA	GO:0015743//malate transport	K03695//ATP-dependent Clp protease ATP-binding subunit ClpB	NA	3.267	gene
104896506	ethylene-responsive transcription factor ERF118-like	GO:0005634//nucleus	GO:0003677//DNA binding;GO:0003700//DNA-binding transcription factor activity	NA	K13434;K14638//solute carrier family 15 (peptide/histidine transporter), member 3/4	4.606	5.347	both
104896443	protein LYK5-like	GO:0016021//integral component of membrane	GO:0005524//ATP binding;GO:0004672//protein kinase activity	NA	K04733//interleukin-1 receptor-associated kinase 4 [EC:2.7.11.1]	NA	-5.321	gene
104896406	ABC transporter G family member 21	GO:0016021//integral component of membrane	GO:0005524//ATP binding;GO:0016887//ATPase activity	NA	K05681//ATP-binding cassette, subfamily G (WHITE), member 2	NA	-1.278	gene
104896327	tRNA(adenine(34)) deaminase, chloroplastic	#N/A	GO:0008251//tRNA-specific adenosine deaminase activity	GO:0002100//tRNA wobble adenosine to inosine editing	K11991//tRNA(adenine34) deaminase [EC:3.5.4.33]	NA	1.648	gene
104896294	scopoletin glucosyltransferase-like	#N/A	GO:0016758//transferase activity, transferring hexosyl groups	NA	K13496;K22771	2.608	NA	promoter
104896273	protein PHYLLO, chloroplastic	NA	GO:0070205//2-succinyl-6-hydroxy-2,4-cyclohexadiene-1-carboxylate synthase activity;GO:0030976//thiamine pyrophosphate binding;GO:0070204//2-succinyl-5-enolpyruvyl-6-hydroxy-3-cyclohexene-1-carboxylic-acid synthase activity	GO:0009234//menaquinone biosynthetic process;GO:0009063//cellular amino acid catabolic process;GO:0042550//photosystem I stabilization;GO:0042372//phylloquinone biosynthetic process	K14759	NA	1.097	gene
104896272	probable choline kinase 1	NA	GO:0016301//kinase activity	NA	K14156//choline/ethanolamine kinase [EC:2.7.1.32 2.7.1.82]	NA	2.489	gene
104896267	S-adenosylmethionine carrier 1, chloroplastic/mitochondrial-like	GO:0016021//integral component of membrane	GO:0005347//ATP transmembrane transporter activity	NA	K15111//solute carrier family 25 (mitochondrial S-adenosylmethionine transporter), member 26	NA	2.948	gene
104896236	DIS3-like exonuclease 2	GO:0000932//P-body	GO:0003723//RNA binding;GO:0046872//metal ion binding;GO:0000175//3'-5'-exoribonuclease activity	GO:0034427//nuclear-transcribed mRNA catabolic process, exonucleolytic, 3'-5';GO:1990074//polyuridylation-dependent mRNA catabolic process	K18758//DIS3-like exonuclease 2 [EC:3.1.13.-]	2.475	NA	promoter
104896214	glycine-rich cell wall structural protein 1-like	GO:0016021//integral component of membrane	NA	NA	K01184//polygalacturonase [EC:3.2.1.15];K01183//chitinase [EC:3.2.1.14]	NA	-4.55	gene
104896165	leucine-rich repeat receptor protein kinase EXS	GO:0016021//integral component of membrane	GO:0004674//protein serine/threonine kinase activity;GO:0005524//ATP binding	NA	K04733//interleukin-1 receptor-associated kinase 4 [EC:2.7.11.1]	1.889	NA	promoter
104896156	histone-lysine N-methyltransferase ASHH1	GO:0005634//nucleus	GO:0018024//histone-lysine N-methyltransferase activity	NA	K11423//histone-lysine N-methyltransferase SETD2 [EC:2.1.1.43]	NA	-5.457	gene
104896137	replication factor C subunit 1	GO:0005634//nucleus;GO:0005663//DNA replication factor C complex	GO:0003689//DNA clamp loader activity;GO:0005524//ATP binding	GO:0006281//DNA repair;GO:0006260//DNA replication	K10754//replication factor C subunit 1	NA	-2.284	gene
104896121	ethylene-responsive transcription factor ABR1-like	GO:0005634//nucleus	GO:0003677//DNA binding;GO:0003700//DNA-binding transcription factor activity	NA	K09286//EREBP-like factor	NA	-1.763	gene
104896118	serine/threonine-protein phosphatase 7	#N/A	GO:0004721//phosphoprotein phosphatase activity	NA	K04460//serine/threonine-protein phosphatase 5 [EC:3.1.3.16]	NA	2.449	gene
104896095	polypyrimidine tract-binding protein homolog 3-like	NA	GO:0003723//RNA binding	NA	K14948//polypyrimidine tract-binding protein 2	NA	-1.044	gene
104896094	protein CPR-5	GO:0016021//integral component of membrane	NA	NA	NA	NA	5.444	gene
104896085	soluble inorganic pyrophosphatase 1, chloroplastic	GO:0005737//cytoplasm	GO:0000287//magnesium ion binding;GO:0004427//inorganic diphosphatase activity	GO:0006796//phosphate-containing compound metabolic process	K01507//inorganic pyrophosphatase [EC:3.6.1.1]	NA	1.124	gene
104896081	mitochondrial import inner membrane translocase subunit tim16-like	GO:0005744//TIM23 mitochondrial import inner membrane translocase complex	NA	GO:0030150//protein import into mitochondrial matrix	K17805//mitochondrial import inner membrane translocase subunit TIM16	1.706	NA	promoter
104896068	UPF0202 protein At1g10490	GO:0005730//nucleolus	GO:1990883//rRNA cytidine N-acetyltransferase activity;GO:0005524//ATP binding;GO:0008080//N-acetyltransferase activity;GO:0000049//tRNA binding	GO:0000154//rRNA modification;GO:1904812//rRNA acetylation involved in maturation of SSU-rRNA;GO:0051391//tRNA acetylation;GO:0042274//ribosomal small subunit biogenesis	K14521//N-acetyltransferase 10 [EC:2.3.1.-]	NA	-2.708	gene
104896021	serine/threonine-protein kinase SAPK2	#N/A	GO:0004674//protein serine/threonine kinase activity;GO:0005524//ATP binding	NA	K14498//serine/threonine-protein kinase SRK2 [EC:2.7.11.1]	-2.686	NA	promoter
104895992	CASP-like protein 5C1	GO:0016021//integral component of membrane;GO:0005886//plasma membrane	NA	NA	NA	-1.696	18.363	both
104895971	cold-regulated 413 plasma membrane protein 4-like	GO:0016021//integral component of membrane	NA	NA	NA	NA	1.063	gene
104895966	probable galacturonosyltransferase-like 1	#N/A	GO:0016757//transferase activity, transferring glycosyl groups	NA	K20893//probable galacturonosyltransferase-like 1 [EC:2.4.1.-]	NA	19.007	gene
104895942	calponin homology domain-containing protein DDB_G0272472	NA	GO:0045735//nutrient reservoir activity	NA	K18626//trichohyalin	NA	-1.218	gene
104895933	protein SET DOMAIN GROUP 41	GO:0016021//integral component of membrane	NA	GO:0055085//transmembrane transport	K11426//SET and MYND domain-containing protein	NA	-1.46	gene
104895926	glycine-rich cell wall structural protein-like	#N/A	NA	GO:0010115//regulation of abscisic acid biosynthetic process;GO:0009408//response to heat	K12741//heterogeneous nuclear ribonucleoprotein A1/A3;K13098//RNA-binding protein FUS;K09250//cellular nucleic acid-binding protein	-1.064	NA	promoter
104895907	sterol 3-beta-glucosyltransferase UGT80B1	NA	GO:0016758//transferase activity, transferring hexosyl groups	GO:0030259//lipid glycosylation;GO:0005975//carbohydrate metabolic process	K05841//sterol 3beta-glucosyltransferase [EC:2.4.1.173]	NA	1.822	gene
104895889	GPI mannosyltransferase 3	GO:0005783//endoplasmic reticulum;GO:0016021//integral component of membrane;GO:0005789//endoplasmic reticulum membrane	GO:0000030//mannosyltransferase activity	GO:0006506//GPI anchor biosynthetic process	K05286//phosphatidylinositol glycan, class B [EC:2.4.1.-]	NA	3.737	gene
104895885	zinc finger protein NUTCRACKER-like	#N/A	GO:0003676//nucleic acid binding	NA	K22410//PR domain zinc finger protein 16;K12309//beta-galactosidase [EC:3.2.1.23]	NA	1.736	gene
104895881	splicing factor 3B subunit 4	GO:0005634//nucleus;GO:0005681//spliceosomal complex;GO:1990904//ribonucleoprotein complex;GO:0005730//nucleolus;GO:0005689//U12-type spliceosomal complex	GO:0003723//RNA binding;GO:0003729//mRNA binding	GO:0048026//positive regulation of mRNA splicing, via spliceosome;GO:0051252//regulation of RNA metabolic process	K12831//splicing factor 3B subunit 4	NA	1.499	gene
104895858	branched-chain-amino-acid aminotransferase 5, chloroplastic-like	#N/A	GO:0052654//L-leucine transaminase activity;GO:0052656//L-isoleucine transaminase activity;GO:0052655//L-valine transaminase activity	GO:0009082//branched-chain amino acid biosynthetic process	K00826//branched-chain amino acid aminotransferase [EC:2.6.1.42]	NA	-1.309	gene
104895855	lysosomal Pro-X carboxypeptidase-like	GO:0005634//nucleus	GO:0008236//serine-type peptidase activity	GO:0006997//nucleus organization	K01285//lysosomal Pro-X carboxypeptidase [EC:3.4.16.2]	NA	3.891	gene
104895842	malate dehydrogenase, glyoxysomal	GO:0005737//cytoplasm;GO:0009507//chloroplast	GO:0030060//L-malate dehydrogenase activity	GO:0006099//tricarboxylic acid cycle;GO:0005975//carbohydrate metabolic process;GO:0006108//malate metabolic process	K00026//malate dehydrogenase [EC:1.1.1.37]	-2.21	NA	promoter
104895830	thiamine biosynthetic bifunctional enzyme TH1, chloroplastic	#N/A	GO:0004789//thiamine-phosphate diphosphorylase activity;GO:0008972//phosphomethylpyrimidine kinase activity	GO:0009228//thiamine biosynthetic process	K14153	NA	-3.722	gene
104895818	probable inactive purple acid phosphatase 2	GO:0016021//integral component of membrane	GO:0046872//metal ion binding;GO:0003993//acid phosphatase activity	NA	K22390//acid phosphatase type 7	NA	-1.412	gene
104895814	probable WRKY transcription factor 57	GO:0005634//nucleus	GO:0043565//sequence-specific DNA binding;GO:0003700//DNA-binding transcription factor activity	NA	K18835;K12835//ATP-dependent RNA helicase DDX42 [EC:3.6.4.13]	-1.096	NA	promoter
104895811	glucose-6-phosphate 1-dehydrogenase, cytoplasmic isoform 2-like	NA	GO:0050661//NADP binding;GO:0004345//glucose-6-phosphate dehydrogenase activity	GO:0006006//glucose metabolic process;GO:0006098//pentose-phosphate shunt	K00036//glucose-6-phosphate 1-dehydrogenase [EC:1.1.1.49 1.1.1.363]	NA	2.875	gene
104895809	beta-glucosidase 40	#N/A	GO:0004553//hydrolase activity, hydrolyzing O-glycosyl compounds	GO:0005975//carbohydrate metabolic process	K01188//beta-glucosidase [EC:3.2.1.21]	NA	-3.134	gene
104895806	probable methyltransferase PMT5	GO:0016021//integral component of membrane	GO:0008168//methyltransferase activity	GO:0032259//methylation	K12175//COP9 signalosome complex subunit 1;K15449//tRNA wybutosine-synthesizing protein 1 [EC:4.1.3.44];K06630//14-3-3 protein epsilon	-1.066	NA	promoter
104895785	magnesium transporter MRS2-5	GO:0016021//integral component of membrane	NA	GO:0006811//ion transport	K16075//magnesium transporter	NA	-4.203	gene
104895778	cell division control protein 48 homolog B	NA	GO:0005524//ATP binding	NA	K13525//transitional endoplasmic reticulum ATPase	NA	-2.84	gene
104895776	protein SPIRAL1-like 1	#N/A	NA	GO:0043622//cortical microtubule organization	K18635	NA	-2.403	gene
104895771	probable 6-phosphogluconolactonase 2	NA	GO:0017057//6-phosphogluconolactonase activity	GO:0006098//pentose-phosphate shunt;GO:0005975//carbohydrate metabolic process	K01057//6-phosphogluconolactonase [EC:3.1.1.31]	NA	1.209	gene
104895750	branchpoint-bridging protein	#N/A	GO:0045131//pre-mRNA branch point binding;GO:0008270//zinc ion binding	GO:0000398//mRNA splicing, via spliceosome	K13095//splicing factor 1	-2.096	NA	promoter
104895745	exosome complex exonuclease RRP44	GO:0000176//nuclear exosome (RNase complex);GO:0000177//cytoplasmic exosome (RNase complex);GO:0000178//exosome (RNase complex)	GO:0003723//RNA binding;GO:0004519//endonuclease activity;GO:0000175//3'-5'-exoribonuclease activity	GO:0016075//rRNA catabolic process	K12585//exosome complex exonuclease DIS3/RRP44 [EC:3.1.13.-]	NA	2.51	gene
104895742	glutamate receptor 3.6-like	GO:0016021//integral component of membrane	GO:0015276//ligand-gated ion channel activity	NA	K05387	NA	2.246	gene
104895735	proton-coupled amino acid transporter 3-like	GO:0016021//integral component of membrane	NA	NA	K14209//solute carrier family 36 (proton-coupled amino acid transporter)	1.433	NA	promoter
104895728	MATE efflux family protein LAL5-like	GO:0016020//membrane;GO:0016021//integral component of membrane	GO:0015297//antiporter activity;GO:0042910//xenobiotic transmembrane transporter activity;GO:0022857//transmembrane transporter activity	NA	K03327//multidrug resistance protein, MATE family	NA	-4.547	gene
104895720	putative methyltransferase At1g22800	NA	GO:0008168//methyltransferase activity	NA	K18162//NADH dehydrogenase [ubiquinone] 1 alpha subcomplex assembly factor 5 [EC:2.1.1.-]	NA	-3.131	gene
104895716	aspartic proteinase-like protein 1	NA	GO:0004190//aspartic-type endopeptidase activity	NA	K00924;K01379//cathepsin D [EC:3.4.23.5];K01381//saccharopepsin [EC:3.4.23.25]	NA	5.415	gene
104895707	inositol-3-phosphate synthase	#N/A	GO:0004512//inositol-3-phosphate synthase activity	GO:0008654//phospholipid biosynthetic process;GO:0006021//inositol biosynthetic process	K01858//myo-inositol-1-phosphate synthase [EC:5.5.1.4]	NA	2.227	gene
104895703	acyl-coenzyme A oxidase 2, peroxisomal	GO:0005777//peroxisome	GO:0003997//acyl-CoA oxidase activity;GO:0071949//FAD binding	GO:0006635//fatty acid beta-oxidation	K00232//acyl-CoA oxidase [EC:1.3.3.6]	-1.834	NA	promoter
104895701	vacuolar iron transporter homolog 2-like	GO:0016021//integral component of membrane	GO:0005384//manganese ion transmembrane transporter activity	GO:0030026//cellular manganese ion homeostasis	K22736//vacuolar iron transporter family protein	1.954	NA	promoter
104895680	asparagine synthetase [glutamine-hydrolyzing] 2	NA	GO:0005524//ATP binding;GO:0004066//asparagine synthase (glutamine-hydrolyzing) activity	GO:0006541//glutamine metabolic process;GO:0006529//asparagine biosynthetic process	K01953//asparagine synthase (glutamine-hydrolysing) [EC:6.3.5.4]	NA	1.645	gene
104895669	ubiquitin carboxyl-terminal hydrolase 3	NA	GO:0036459//thiol-dependent ubiquitinyl hydrolase activity	GO:0006511//ubiquitin-dependent protein catabolic process;GO:0016579//protein deubiquitination	K11842//ubiquitin carboxyl-terminal hydrolase 12/46 [EC:3.4.19.12]	NA	2.056	gene
104895642	prolyl endopeptidase-like	#N/A	GO:0004252//serine-type endopeptidase activity;GO:0070008//serine-type exopeptidase activity	NA	K01354	NA	-1.228	gene
104895641	cell division cycle-associated 7-like protein	#N/A	NA	GO:0006355//regulation of transcription, DNA-templated	K22485	NA	-3.258	gene
104895627	geraniol 8-hydroxylase-like	GO:0016021//integral component of membrane	GO:0016705//oxidoreductase activity, acting on paired donors, with incorporation or reduction of molecular oxygen;GO:0020037//heme binding;GO:0005506//iron ion binding;GO:0004497//monooxygenase activity	NA	K20556	NA	-1.112	gene
104895592	pentatricopeptide repeat-containing protein At4g37170	#N/A	GO:0008270//zinc ion binding	NA	K22733//magnesium transporter	NA	1.787	gene
104895578	phosphoglycerate mutase-like protein 4	#N/A	GO:0003824//catalytic activity	NA	K15634//probable phosphoglycerate mutase [EC:5.4.2.12]	1.787	NA	promoter
104895557	la-related protein 1C-like	#N/A	GO:0003723//RNA binding	NA	K18757//la-related protein 1	NA	2.54	gene
104895553	pre-rRNA-processing protein esf1	GO:0005634//nucleus	GO:0003723//RNA binding	GO:0006364//rRNA processing	K14306//nuclear pore complex protein Nup62	NA	1.115	gene
104895552	aspartic proteinase-like protein 1	#N/A	GO:0004190//aspartic-type endopeptidase activity	NA	K00924;K01379//cathepsin D [EC:3.4.23.5];K01381//saccharopepsin [EC:3.4.23.25]	NA	1.115	gene
104895539	rRNA methyltransferase 3B, mitochondrial	#N/A	GO:0003723//RNA binding;GO:0008173//RNA methyltransferase activity	GO:0006396//RNA processing	K03437	NA	2.949	gene
104895529	KH domain-containing protein At4g18375	#N/A	GO:0003723//RNA binding	NA	K21444//poly(rC)-binding protein 3/4	NA	2.063	gene
104895522	receptor-like cytosolic serine/threonine-protein kinase RBK1	#N/A	GO:0004674//protein serine/threonine kinase activity;GO:0005524//ATP binding	NA	K04733//interleukin-1 receptor-associated kinase 4 [EC:2.7.11.1]	NA	1.179	gene
104895512	neurofilament medium polypeptide	NA	GO:0003779//actin binding	NA	K10352//myosin heavy chain;K20478//golgin subfamily B member 1	NA	-1.003	gene
104895508	mechanosensitive ion channel protein 2, chloroplastic	GO:0016020//membrane	NA	GO:0055085//transmembrane transport	K22047	6.68	NA	promoter
104895504	kinesin-like protein KCA2	#N/A	GO:0005524//ATP binding;GO:0003777//microtubule motor activity;GO:0008017//microtubule binding	GO:0007018//microtubule-based movement;GO:0009904//chloroplast accumulation movement	K10405//kinesin family member C1;K10406//kinesin family member C2/C3	NA	5.721	gene
104895498	CDP-diacylglycerol--serine O-phosphatidyltransferase 1	GO:0016021//integral component of membrane	GO:0003882//CDP-diacylglycerol-serine O-phosphatidyltransferase activity	GO:0006659//phosphatidylserine biosynthetic process	K08730//phosphatidylserine synthase 2 [EC:2.7.8.29]	NA	2.536	gene
104895497	probable WRKY transcription factor 13	GO:0005634//nucleus	GO:0043565//sequence-specific DNA binding;GO:0003700//DNA-binding transcription factor activity	NA	K18835;K13424//WRKY transcription factor 33	-1.114	-1.491	both
104895488	tetraspanin-8-like	GO:0009506//plasmodesma;GO:0016021//integral component of membrane;GO:0005886//plasma membrane	NA	NA	K17345//tetraspanin-5;K17356//tetraspanin-13/31	1.471	NA	promoter
104895426	1-aminocyclopropane-1-carboxylate oxidase homolog 1-like	NA	GO:0046872//metal ion binding;GO:0016491//oxidoreductase activity	NA	K06892//feruloyl-CoA ortho-hydroxylase [EC:1.14.11.-];K13229	NA	1.038	gene
104895396	callose synthase 5	GO:0016021//integral component of membrane;GO:0000148//1,3-beta-D-glucan synthase complex	GO:0003843//1,3-beta-D-glucan synthase activity	GO:0006075//(1->3)-beta-D-glucan biosynthetic process	K11000//callose synthase [EC:2.4.1.-]	-5.142	NA	promoter
104895393	flap endonuclease 1	GO:0005654//nucleoplasm;GO:0005730//nucleolus;GO:0005739//mitochondrion	GO:0000287//magnesium ion binding;GO:0003677//DNA binding;GO:0008409//5'-3' exonuclease activity;GO:0017108//5'-flap endonuclease activity	GO:0006284//base-excision repair;GO:0006260//DNA replication;GO:0043137//DNA replication, removal of RNA primer	K04799//flap endonuclease-1 [EC:3.-.-.-]	NA	5.487	gene
104895390	DEAD-box ATP-dependent RNA helicase 3, chloroplastic	GO:0005634//nucleus	GO:0003723//RNA binding;GO:0005524//ATP binding;GO:0008270//zinc ion binding;GO:0004386//helicase activity	NA	K16911//ATP-dependent RNA helicase DDX21 [EC:3.6.4.13]	2.627	NA	promoter
104895388	ATPase WRNIP1	#N/A	GO:0003677//DNA binding;GO:0005524//ATP binding	GO:0006260//DNA replication	K07478//putative ATPase	-1.315	NA	promoter
104895360	50S ribosomal protein L27, chloroplastic	GO:0005840//ribosome;GO:0009507//chloroplast	GO:0003735//structural constituent of ribosome	GO:0006412//translation	K02899//large subunit ribosomal protein L27	-3.17	NA	promoter
104895358	ribonucleoside-diphosphate reductase small chain	#N/A	GO:0016491//oxidoreductase activity	GO:0009263//deoxyribonucleotide biosynthetic process	K10808//ribonucleoside-diphosphate reductase subunit M2 [EC:1.17.4.1]	-1.633	NA	promoter
104895335	protein GAMETE EXPRESSED 1-like	GO:0016021//integral component of membrane	NA	NA	K18171//COX assembly mitochondrial protein 1;K00760//hypoxanthine phosphoribosyltransferase [EC:2.4.2.8];K18626//trichohyalin	NA	-1.14	gene
104895331	sodium/hydrogen exchanger 8	GO:0016021//integral component of membrane	GO:0015299//solute:proton antiporter activity	NA	K14724//solute carrier family 9 (sodium/hydrogen exchanger), member 8	NA	-2.536	gene
104895308	zinc finger CCCH domain-containing protein 44	GO:0005777//peroxisome	GO:0046872//metal ion binding;GO:0003677//DNA binding	GO:0010468//regulation of gene expression	K19984//exocyst complex component 5	NA	-2.733	gene
104895301	mitogen-activated protein kinase homolog NTF3-like	GO:0005634//nucleus;GO:0005737//cytoplasm	GO:0005524//ATP binding;GO:0004707//MAP kinase activity	GO:0010468//regulation of gene expression;GO:0035556//intracellular signal transduction	K20537//mitogen-activated protein kinase 7/14 [EC:2.7.11.24];K20535//mitogen-activated protein kinase 1/2 [EC:2.7.11.24]	NA	-1.204	gene
104895260	probable transporter mch1	GO:0016021//integral component of membrane	NA	NA	K14794//ribosomal RNA-processing protein 12	1.836	NA	promoter
104895257	pentatricopeptide repeat-containing protein At3g26630, chloroplastic	GO:0005737//cytoplasm	GO:0051536//iron-sulfur cluster binding	GO:0016226//iron-sulfur cluster assembly	K03798;K03452//magnesium/proton exchanger	1.052	NA	promoter
104895238	probable metal-nicotianamine transporter YSL6	GO:0016021//integral component of membrane	NA	GO:0055085//transmembrane transport	K15363//fanconi-associated nuclease 1 [EC:3.1.21.- 3.1.4.1];K02902//large subunit ribosomal protein L28;K01807//ribose 5-phosphate isomerase A [EC:5.3.1.6]	NA	3.397	gene
104895229	membrane-anchored ubiquitin-fold protein 3	GO:0005886//plasma membrane	NA	NA	NA	NA	-5.762	gene
104895224	probable protein S-acyltransferase 7	GO:0016021//integral component of membrane	GO:0019706//protein-cysteine S-palmitoyltransferase activity	NA	K16675//palmitoyltransferase ZDHHC9/14/18 [EC:2.3.1.225]	1.904	NA	promoter
104895200	AP-2 complex subunit sigma	GO:0016020//membrane;GO:0043231//intracellular membrane-bounded organelle	NA	GO:0006886//intracellular protein transport;GO:0016192//vesicle-mediated transport	K11827//AP-2 complex subunit sigma-1	NA	-1.341	gene
104895192	DNA-(apurinic or apyrimidinic site) lyase 2	NA	GO:0003677//DNA binding;GO:0008270//zinc ion binding;GO:0004519//endonuclease activity	GO:0006281//DNA repair	K10772//AP endonuclease 2 [EC:4.2.99.18]	NA	2.779	gene
104895184	calmodulin-lysine N-methyltransferase	GO:0005737//cytoplasm	GO:0018025//calmodulin-lysine N-methyltransferase activity	NA	K18826//calmodulin-lysine N-methyltransferase [EC:2.1.1.60]	NA	-1.673	gene
104895175	proteasome subunit alpha type-7	GO:0019773//proteasome core complex, alpha-subunit complex;GO:0005634//nucleus;GO:0005737//cytoplasm;GO:0005839//proteasome core complex	GO:0004175//endopeptidase activity;GO:0004298//threonine-type endopeptidase activity	GO:0043161//proteasome-mediated ubiquitin-dependent protein catabolic process;GO:0006511//ubiquitin-dependent protein catabolic process;GO:0010499//proteasomal ubiquitin-independent protein catabolic process;GO:0010498//proteasomal protein catabolic process	K02731//20S proteasome subunit alpha 4 [EC:3.4.25.1]	NA	3.26	gene
104895152	alcohol dehydrogenase 2	GO:0005829//cytosol	GO:0008270//zinc ion binding;GO:0004024//alcohol dehydrogenase activity, zinc-dependent;GO:0016491//oxidoreductase activity;GO:0051903//S-(hydroxymethyl)glutathione dehydrogenase activity	GO:0046294//formaldehyde catabolic process	K18857//alcohol dehydrogenase class-P [EC:1.1.1.1]	NA	4.846	gene
104895117	ABC transporter D family member 1	GO:0016021//integral component of membrane	GO:0005524//ATP binding;GO:0042626//ATPase-coupled transmembrane transporter activity;GO:0016887//ATPase activity	NA	K05677//ATP-binding cassette, subfamily D (ALD), member 3	NA	4.151	gene
104895114	cytochrome P450 84A1	GO:0016021//integral component of membrane	GO:0016705//oxidoreductase activity, acting on paired donors, with incorporation or reduction of molecular oxygen;GO:0020037//heme binding;GO:0005506//iron ion binding;GO:0004497//monooxygenase activity	NA	K09755//ferulate-5-hydroxylase [EC:1.14.-.-]	NA	1.374	gene
104895088	protein GAMETE EXPRESSED 1	GO:0016021//integral component of membrane	NA	NA	K18171//COX assembly mitochondrial protein 1;K00760//hypoxanthine phosphoribosyltransferase [EC:2.4.2.8];K18626//trichohyalin	2.436	NA	promoter
104895083	peroxidase 72-like	GO:0005576//extracellular region	GO:0046872//metal ion binding;GO:0020037//heme binding;GO:0004601//peroxidase activity	GO:0006979//response to oxidative stress;GO:0042744//hydrogen peroxide catabolic process	K00430//peroxidase [EC:1.11.1.7]	18.673	2.172	both
104895080	peroxidase 72-like	GO:0005576//extracellular region	GO:0046872//metal ion binding;GO:0020037//heme binding;GO:0004601//peroxidase activity	GO:0006979//response to oxidative stress;GO:0042744//hydrogen peroxide catabolic process	K00430//peroxidase [EC:1.11.1.7]	-1.364	NA	promoter
104895079	peroxidase 72-like	GO:0005576//extracellular region	GO:0046872//metal ion binding;GO:0020037//heme binding;GO:0004601//peroxidase activity	GO:0006979//response to oxidative stress;GO:0042744//hydrogen peroxide catabolic process	K00430//peroxidase [EC:1.11.1.7]	NA	-1.032	gene
104895073	ocs element-binding factor 1-like	NA	GO:0003700//DNA-binding transcription factor activity	NA	K09060	3.298	NA	promoter
104895048	thioredoxin-like protein 4B	GO:0005682//U5 snRNP;GO:0046540//U4/U6 x U5 tri-snRNP complex	NA	GO:0000398//mRNA splicing, via spliceosome	K03243//translation initiation factor 5B;K12859//U5 snRNP protein, DIM1 family	NA	3.258	gene
104895037	ATPase family AAA domain-containing protein 3-like	GO:0005739//mitochondrion	GO:0005524//ATP binding	GO:0007005//mitochondrion organization	K17681//ATPase family AAA domain-containing protein 3A/B	NA	-3.486	gene
104895030	nucleolar protein 6	GO:0005730//nucleolus	GO:0003723//RNA binding	NA	K14544//U3 small nucleolar RNA-associated protein 22	1.715	NA	promoter
104895020	germin-like protein 5-1	GO:0048046//apoplast;GO:0009506//plasmodesma;GO:0005618//cell wall	GO:0045735//nutrient reservoir activity;GO:0030145//manganese ion binding	GO:0010497//plasmodesmata-mediated intercellular transport;GO:2000280//regulation of root development	K00856//adenosine kinase [EC:2.7.1.20];K00384	NA	2.142	gene
104895001	zinc finger protein 4-like	NA	GO:0003676//nucleic acid binding	NA	K08081;K10773//endonuclease III [EC:4.2.99.18]	1.383	NA	promoter
104894975	protein PHLOEM PROTEIN 2-LIKE A10	GO:0016021//integral component of membrane	NA	NA	NA	-1.274	NA	promoter
104894964	lysosomal beta glucosidase-like	#N/A	GO:0004553//hydrolase activity, hydrolyzing O-glycosyl compounds	GO:0005975//carbohydrate metabolic process	K05349//beta-glucosidase [EC:3.2.1.21]	NA	-1.015	gene
104894962	probable amino-acid acetyltransferase NAGS2, chloroplastic	GO:0005737//cytoplasm	GO:0004042//acetyl-CoA:L-glutamate N-acetyltransferase activity	GO:0006526//arginine biosynthetic process	K14682	NA	-4.139	gene
104894954	adenylyl-sulfate kinase, chloroplastic	#N/A	GO:0005524//ATP binding;GO:0004020//adenylylsulfate kinase activity	GO:0000103//sulfate assimilation;GO:0070814//hydrogen sulfide biosynthetic process	K00860//adenylylsulfate kinase [EC:2.7.1.25]	NA	1.699	gene
104894894	gibberellin 20 oxidase 1-B-like	#N/A	GO:0046872//metal ion binding;GO:0047927//gibberellin-44 dioxygenase activity;GO:0016491//oxidoreductase activity	NA	K05282	4.579	NA	promoter
104894878	UPF0481 protein At3g47200	GO:0016021//integral component of membrane	NA	NA	K01193//beta-fructofuranosidase [EC:3.2.1.26]	2.131	NA	promoter
104894876	probable beta-1,4-xylosyltransferase IRX14	GO:0016021//integral component of membrane;GO:0000139//Golgi membrane	GO:0015018//galactosylgalactosylxylosylprotein 3-beta-glucuronosyltransferase activity	GO:0071555//cell wall organization	K20871//putative beta-1,4-xylosyltransferase IRX14 [EC:2.4.2.-]	NA	-1.131	gene
104894842	probable polygalacturonase	GO:0005576//extracellular region	GO:0004650//polygalacturonase activity	GO:0005975//carbohydrate metabolic process;GO:0071555//cell wall organization	K01184//polygalacturonase [EC:3.2.1.15]	-1.23	NA	promoter
104894838	probable pectinesterase/pectinesterase inhibitor	GO:0016021//integral component of membrane	GO:0045330//aspartyl esterase activity;GO:0004857//enzyme inhibitor activity;GO:0030599//pectinesterase activity	GO:0045490//pectin catabolic process;GO:0042545//cell wall modification	K01051//pectinesterase [EC:3.1.1.11]	1.015	NA	promoter
104894837	peptide chain release factor 1-like, mitochondrial	#N/A	GO:0016149//translation release factor activity, codon specific	NA	K02835//peptide chain release factor 1	1.015	NA	promoter
104894830	nifU-like protein 1, chloroplastic	NA	GO:0005506//iron ion binding;GO:0051536//iron-sulfur cluster binding	GO:0016226//iron-sulfur cluster assembly	K22074//NFU1 iron-sulfur cluster scaffold homolog, mitochondrial	1.142	NA	promoter
104894826	heat shock 70 kDa protein 17	GO:0034663//endoplasmic reticulum chaperone complex;GO:0005783//endoplasmic reticulum	NA	GO:0071456//cellular response to hypoxia;GO:1903298//negative regulation of hypoxia-induced intrinsic apoptotic signaling pathway	K09486//hypoxia up-regulated 1	NA	3.484	gene
104894817	GDSL esterase/lipase At3g62280	NA	GO:0016788//hydrolase activity, acting on ester bonds	NA	K10396//kinesin family member 5;K01206//alpha-L-fucosidase [EC:3.2.1.51]	NA	-1.058	gene
104894778	proline-rich receptor-like protein kinase PERK3	GO:0016021//integral component of membrane	GO:0005524//ATP binding;GO:0004672//protein kinase activity	NA	K04733//interleukin-1 receptor-associated kinase 4 [EC:2.7.11.1]	-3.107	NA	promoter
104894766	probable glutamyl endopeptidase, chloroplastic	#N/A	GO:0004252//serine-type endopeptidase activity;GO:0008236//serine-type peptidase activity	NA	K01303//acylaminoacyl-peptidase [EC:3.4.19.1]	-1.056	NA	promoter
104894762	DNA replication licensing factor MCM7	GO:0005634//nucleus;GO:0042555//MCM complex	GO:0003677//DNA binding;GO:0005524//ATP binding;GO:0003678//DNA helicase activity	GO:0006270//DNA replication initiation;GO:0007049//cell cycle	K02210//DNA replication licensing factor MCM7 [EC:3.6.4.12]	-1.106	NA	promoter
104894749	peptidyl-prolyl cis-trans isomerase FKBP17-1, chloroplastic	NA	GO:0003755//peptidyl-prolyl cis-trans isomerase activity	NA	K09571//FK506-binding protein 4/5 [EC:5.2.1.8];K14826//FK506-binding nuclear protein [EC:5.2.1.8]	NA	1.179	gene
104894694	TOM1-like protein 2	NA	NA	GO:0006886//intracellular protein transport	K12182//hepatocyte growth factor-regulated tyrosine kinase substrate;K13126//polyadenylate-binding protein;K13141//integrator complex subunit 4	NA	3.263	gene
104894691	two-component response regulator ARR22-like	NA	NA	GO:0000160//phosphorelay signal transduction system	K19691;K14489	-1.288	NA	promoter
104894681	cysteine-rich receptor-like protein kinase 27	#N/A	GO:0005524//ATP binding;GO:0004672//protein kinase activity	NA	K17535//serine/threonine-protein kinase TNNI3K [EC:2.7.11.1];K01968//3-methylcrotonyl-CoA carboxylase alpha subunit [EC:6.4.1.4]	20.026	NA	promoter
104894673	probable methyltransferase PMT26	GO:0016021//integral component of membrane	GO:0008168//methyltransferase activity	GO:0032259//methylation	K15449//tRNA wybutosine-synthesizing protein 1 [EC:4.1.3.44]	NA	6.067	gene
104894654	ethylene-responsive transcription factor ERF098-like	GO:0005634//nucleus	GO:0003677//DNA binding;GO:0003700//DNA-binding transcription factor activity	NA	K09286//EREBP-like factor;K14516	NA	1.292	gene
104894647	autophagy-related protein 9	GO:0005794//Golgi apparatus;GO:0016021//integral component of membrane;GO:0030659//cytoplasmic vesicle membrane	NA	GO:0006914//autophagy;GO:0015031//protein transport	K17907//autophagy-related protein 9	NA	1.172	gene
104894638	probable methyltransferase PMT26	GO:0016021//integral component of membrane	GO:0008168//methyltransferase activity	NA	K15449//tRNA wybutosine-synthesizing protein 1 [EC:4.1.3.44]	-0.22	2.501	both
104894593	putative uridine kinase C227.14	#N/A	GO:0005524//ATP binding;GO:0016301//kinase activity	NA	K00876//uridine kinase [EC:2.7.1.48];K17065//dynamin 1-like protein [EC:3.6.5.5]	NA	1.631	gene
104894590	protein OSB2, chloroplastic-like	#N/A	GO:0003697//single-stranded DNA binding	GO:0006260//DNA replication	K01810//glucose-6-phosphate isomerase [EC:5.3.1.9];K01051//pectinesterase [EC:3.1.1.11]	NA	5.073	gene
104894579	pyruvate kinase isozyme A, chloroplastic	GO:0005737//cytoplasm;GO:0009570//chloroplast stroma;GO:0009507//chloroplast	GO:0030955//potassium ion binding;GO:0000287//magnesium ion binding;GO:0004743//pyruvate kinase activity;GO:0005524//ATP binding;GO:0016301//kinase activity	GO:0006096//glycolytic process	K00873//pyruvate kinase [EC:2.7.1.40]	NA	1.848	gene
104894557	ATP synthase mitochondrial F1 complex assembly factor 2-like	NA	NA	GO:0043461//proton-transporting ATP synthase complex assembly	K07556//ATP synthase mitochondrial F1 complex assembly factor 2	NA	5.044	gene
104894550	caffeoylshikimate esterase-like	GO:0016020//membrane	GO:0016298//lipase activity	NA	K01054//acylglycerol lipase [EC:3.1.1.23]	2.243	NA	promoter
104894546	sulfate transporter 3.1	GO:0016021//integral component of membrane;GO:0009507//chloroplast	GO:0008271//secondary active sulfate transmembrane transporter activity	NA	K17471//sulfate transporter 3	NA	1.769	gene
104894533	CST complex subunit STN1	#N/A	GO:0003676//nucleic acid binding	NA	K10739//replication factor A2	NA	1.86	gene
104894477	pentatricopeptide repeat-containing protein At4g21065	#N/A	GO:0008270//zinc ion binding	NA	K03452//magnesium/proton exchanger;K10683//BRCA1-associated RING domain protein 1	NA	1.472	gene
104894476	methyl-CpG-binding domain-containing protein 9	#N/A	GO:0046872//metal ion binding	NA	K13196//zinc finger protein ubi-d4	NA	1.709	gene
104894442	UDP-sugar pyrophosphorylase 1	NA	GO:0070569//uridylyltransferase activity	NA	K12447//UDP-sugar pyrophosphorylase [EC:2.7.7.64]	NA	4.814	gene
104894438	factor of DNA methylation 5-like	#N/A	NA	GO:0031047//gene silencing by RNA	K14709//solute carrier family 39 (zinc transporter), member 1/2/3;K14844//pumilio homology domain family member 6;K18626//trichohyalin;K17824//DCN1-like protein 4/5	NA	-1.288	gene
104894437	factor of DNA methylation 1-like	#N/A	NA	GO:0031047//gene silencing by RNA	K14844//pumilio homology domain family member 6;K18626//trichohyalin;K10406//kinesin family member C2/C3;K17824//DCN1-like protein 4/5	NA	5.047	gene
104894435	cationic amino acid transporter 5	GO:0016021//integral component of membrane	GO:0022857//transmembrane transporter activity	NA	K03294;K13866//solute carrier family 7 (cationic amino acid transporter), member 4	NA	2.048	gene
104894425	fimbrin-2	GO:0005884//actin filament;GO:0032432//actin filament bundle;GO:0005737//cytoplasm	GO:0051015//actin filament binding	GO:0051639//actin filament network formation;GO:0051017//actin filament bundle assembly	K17275//plastin-1	NA	2.118	gene
104894416	pentatricopeptide repeat-containing protein At1g62350	#N/A	GO:0046872//metal ion binding	NA	K20131//Rab5 GDP/GTP exchange factor;K01183//chitinase [EC:3.2.1.14]	-0.972	-18.549	both
104894410	tRNA(His) guanylyltransferase 1-like	#N/A	GO:0000287//magnesium ion binding;GO:0004523//RNA-DNA hybrid ribonuclease activity;GO:0008193//tRNA guanylyltransferase activity;GO:0003676//nucleic acid binding	GO:0006400//tRNA modification	K10761//tRNA(His) guanylyltransferase [EC:2.7.7.79]	NA	3.626	gene
104894402	protein disulfide-isomerase 5-2	GO:0016021//integral component of membrane	NA	GO:0045454//cell redox homeostasis	K09580//protein disulfide-isomerase A1 [EC:5.3.4.1]	1.472	NA	promoter
104894394	probable receptor-like serine/threonine-protein kinase At5g57670	NA	GO:0005524//ATP binding;GO:0004672//protein kinase activity	NA	K04733//interleukin-1 receptor-associated kinase 4 [EC:2.7.11.1]	1.677	NA	promoter
104894377	protein NRT1/ PTR FAMILY 2.11-like	GO:0016021//integral component of membrane	GO:0022857//transmembrane transporter activity	NA	K14638//solute carrier family 15 (peptide/histidine transporter), member 3/4	NA	-4.355	gene
104894332	putative pentatricopeptide repeat-containing protein At1g64310	GO:0043231//intracellular membrane-bounded organelle;GO:0005739//mitochondrion	NA	GO:0009451//RNA modification	K19589//release factor glutamine methyltransferase [EC:2.1.1.297];K17710//pentatricopeptide repeat domain-containing protein 1;K22733//magnesium transporter	NA	2.106	gene
104894318	probable LRR receptor-like serine/threonine-protein kinase At4g26540	GO:0016021//integral component of membrane	GO:0004674//protein serine/threonine kinase activity;GO:0005524//ATP binding	NA	K00924;K17422//large subunit ribosomal protein L41;K13420	NA	3.56	gene
104894305	protein transport protein Sec61 subunit gamma-1-like	#N/A	GO:0004523//RNA-DNA hybrid ribonuclease activity;GO:0003676//nucleic acid binding	NA	K07342//protein transport protein SEC61 subunit gamma and related proteins	NA	2.779	gene
104894297	diphthamide biosynthesis protein 7 homolog	#N/A	GO:0008168//methyltransferase activity	GO:0032259//methylation	K17868//diphthine methyl ester acylhydrolase [EC:3.1.1.97]	-1.179	NA	promoter
104894278	serine/threonine-protein kinase ATM	GO:0005634//nucleus	GO:0004674//protein serine/threonine kinase activity;GO:0005524//ATP binding	GO:0010212//response to ionizing radiation;GO:0006281//DNA repair;GO:0000077//DNA damage checkpoint;GO:0016572//histone phosphorylation;GO:0000723//telomere maintenance	K04728//serine-protein kinase ATM [EC:2.7.11.1]	NA	5.686	gene
104894253	probable 26S proteasome complex subunit sem1-2	GO:0008541//proteasome regulatory particle, lid subcomplex	NA	GO:0006406//mRNA export from nucleus;GO:0043248//proteasome assembly	K10881//26 proteasome complex subunit DSS1	NA	-2.375	gene
104894228	protease Do-like 9	#N/A	GO:0004252//serine-type endopeptidase activity	GO:0006508//proteolysis	K11338//RuvB-like protein 2 [EC:3.6.4.12];K12614//ATP-dependent RNA helicase DDX6/DHH1 [EC:3.6.4.13]	NA	1.994	gene
104894225	protease Do-like 9	#N/A	GO:0004252//serine-type endopeptidase activity	NA	K08669//HtrA serine peptidase 2 [EC:3.4.21.108];K11338//RuvB-like protein 2 [EC:3.6.4.12];K12614//ATP-dependent RNA helicase DDX6/DHH1 [EC:3.6.4.13]	NA	4.299	gene
104894215	heat shock cognate 70 kDa protein-like	GO:0005737//cytoplasm	GO:0051787//misfolded protein binding;GO:0005524//ATP binding;GO:0051082//unfolded protein binding;GO:0031072//heat shock protein binding;GO:0044183//protein folding chaperone;GO:0016887//ATPase activity	GO:0006986//response to unfolded protein;GO:0051085//chaperone cofactor-dependent protein refolding;GO:0034620//cellular response to unfolded protein;GO:0042026//protein refolding	K03283//heat shock 70kDa protein 1/2/6/8	NA	4.377	gene
104894209	probable alpha-mannosidase I MNS5	GO:0016020//membrane	GO:0004571//mannosyl-oligosaccharide 1,2-alpha-mannosidase activity;GO:0005509//calcium ion binding	GO:0006284//base-excision repair	K10084//ER degradation enhancer, mannosidase alpha-like 1	1.212	NA	promoter
104894202	betaine aldehyde dehydrogenase, chloroplastic	GO:0009507//chloroplast	GO:0016620//oxidoreductase activity, acting on the aldehyde or oxo group of donors, NAD or NADP as acceptor;GO:0008802//betaine-aldehyde dehydrogenase activity	GO:0006081//cellular aldehyde metabolic process;GO:0019285//glycine betaine biosynthetic process from choline	K00130//betaine-aldehyde dehydrogenase [EC:1.2.1.8]	NA	-1.161	gene
104894193	alpha-L-arabinofuranosidase 1-like	#N/A	GO:0046556//alpha-L-arabinofuranosidase activity	GO:0046373//L-arabinose metabolic process	K01209//alpha-N-arabinofuranosidase [EC:3.2.1.55]	NA	2.559	gene
104894169	transportin-3	GO:0005634//nucleus;GO:0005737//cytoplasm	GO:0008536//Ran GTPase binding	GO:0043484//regulation of RNA splicing;GO:0006886//intracellular protein transport;GO:0006606//protein import into nucleus	K15436//transportin-3	NA	3.509	gene
104894138	bifunctional purine biosynthesis protein purH-like	#N/A	GO:0004643//phosphoribosylaminoimidazolecarboxamide formyltransferase activity;GO:0003937//IMP cyclohydrolase activity	GO:0006164//purine nucleotide biosynthetic process	K00602//phosphoribosylaminoimidazolecarboxamide formyltransferase / IMP cyclohydrolase [EC:2.1.2.3 3.5.4.10]	NA	3.123	gene
104894116	lysine-specific demethylase JMJ25-like	#N/A	GO:0003677//DNA binding	NA	K15601//lysine-specific demethylase 3 [EC:1.14.11.-]	NA	-1.475	gene
104894096	glutathione S-transferase U10-like	GO:0005737//cytoplasm	GO:0004364//glutathione transferase activity	GO:0006749//glutathione metabolic process	K00799//glutathione S-transferase [EC:2.5.1.18]	-1.271	NA	promoter
104894042	geranylgeranyl diphosphate reductase, chloroplastic	#N/A	GO:0016628//oxidoreductase activity, acting on the CH-CH group of donors, NAD or NADP as acceptor;GO:0071949//FAD binding;GO:0045550//geranylgeranyl reductase activity	GO:0015979//photosynthesis;GO:0015995//chlorophyll biosynthetic process	K10960	NA	-1.287	gene
104894033	MADS-box transcription factor 57	GO:0005634//nucleus	GO:0003677//DNA binding;GO:0046983//protein dimerization activity	NA	K04454//MADS-box transcription enhancer factor 2C	1.841	NA	promoter
104894029	histidine biosynthesis bifunctional protein hisIE, chloroplastic	#N/A	GO:0004636//phosphoribosyl-ATP diphosphatase activity;GO:0004635//phosphoribosyl-AMP cyclohydrolase activity	GO:0000105//histidine biosynthetic process	K11755	NA	3.293	gene
104893993	zinc finger RNA-binding protein 2-like	#N/A	GO:0008270//zinc ion binding;GO:0003676//nucleic acid binding	NA	NA	NA	-1.321	gene
104893974	50S ribosomal protein L17, chloroplastic	GO:0005840//ribosome	GO:0003735//structural constituent of ribosome	GO:0006412//translation	K02879//large subunit ribosomal protein L17	NA	3.773	gene
104893973	SNAP25 homologous protein SNAP33-like	GO:0016020//membrane	GO:0005484//SNAP receptor activity	GO:0006886//intracellular protein transport	K18211//synaptosomal-associated protein 25	NA	1.167	gene
104893952	enolase 1, chloroplastic	GO:0000015//phosphopyruvate hydratase complex	GO:0000287//magnesium ion binding;GO:0004634//phosphopyruvate hydratase activity	GO:0006096//glycolytic process	K01689//enolase [EC:4.2.1.11]	NA	1.693	gene
104893947	serine protease SPPA, chloroplastic	GO:0009535//chloroplast thylakoid membrane;GO:0009941//chloroplast envelope	GO:0004252//serine-type endopeptidase activity;GO:0008233//peptidase activity	NA	K04773	NA	-1.358	gene
104893925	truncated transcription factor CAULIFLOWER A	GO:0005634//nucleus	GO:0000977//RNA polymerase II transcription regulatory region sequence-specific DNA binding;GO:0003700//DNA-binding transcription factor activity;GO:0046983//protein dimerization activity	GO:0045944//positive regulation of transcription by RNA polymerase II	K09264//MADS-box transcription factor, plant	NA	-2.06	gene
104893922	MADS-box protein CMB1-like	GO:0005634//nucleus	GO:0000977//RNA polymerase II transcription regulatory region sequence-specific DNA binding;GO:0003700//DNA-binding transcription factor activity;GO:0046983//protein dimerization activity	GO:0045944//positive regulation of transcription by RNA polymerase II	K09264//MADS-box transcription factor, plant	NA	3.456	gene
104893902	myosin heavy chain, non-muscle	#N/A	NA	GO:0000911//cytokinesis by cell plate formation	NA	NA	3.942	gene
104893899	golgin candidate 6	GO:0005795//Golgi stack;GO:0005783//endoplasmic reticulum;GO:0012507//ER to Golgi transport vesicle membrane;GO:0000139//Golgi membrane	NA	GO:0006886//intracellular protein transport;GO:0061025//membrane fusion;GO:0048280//vesicle fusion with Golgi apparatus;GO:0048211//Golgi vesicle docking;GO:0006888//endoplasmic reticulum to Golgi vesicle-mediated transport;GO:0045056//transcytosis	K20361	NA	-4.492	gene
104893897	mitochondrial phosphate carrier protein 3, mitochondrial-like	GO:0016021//integral component of membrane	NA	NA	K15102//solute carrier family 25 (mitochondrial phosphate transporter), member 3	2.264	1.586	both
104893896	mitochondrial phosphate carrier protein 3, mitochondrial-like	GO:0016021//integral component of membrane;GO:0031305//integral component of mitochondrial inner membrane	GO:0005315//inorganic phosphate transmembrane transporter activity	GO:0035435//phosphate ion transmembrane transport	K15102//solute carrier family 25 (mitochondrial phosphate transporter), member 3	NA	1.84	gene
104893883	probable serine/threonine-protein kinase At1g54610	#N/A	GO:0005524//ATP binding;GO:0004672//protein kinase activity	NA	K08819//cyclin-dependent kinase 12/13 [EC:2.7.11.22 2.7.11.23]	1.28	NA	promoter
104893862	SWI/SNF complex subunit SWI3C	GO:0005634//nucleus	GO:0003677//DNA binding	NA	K11649//SWI/SNF related-matrix-associated actin-dependent regulator of chromatin subfamily C	NA	3.49	gene
104893851	RNA pseudouridine synthase 7	#N/A	GO:0003723//RNA binding;GO:0009982//pseudouridine synthase activity	GO:0001522//pseudouridine synthesis	K06180	NA	4.641	gene
104893849	glutamate-1-semialdehyde 2,1-aminomutase, chloroplastic-like	GO:0009507//chloroplast	GO:0008483//transaminase activity;GO:0042286//glutamate-1-semialdehyde 2,1-aminomutase activity;GO:0030170//pyridoxal phosphate binding	GO:0006782//protoporphyrinogen IX biosynthetic process;GO:0033014//tetrapyrrole biosynthetic process;GO:0006779//porphyrin-containing compound biosynthetic process;GO:0015995//chlorophyll biosynthetic process	K01845//glutamate-1-semialdehyde 2,1-aminomutase [EC:5.4.3.8]	NA	4.885	gene
104893820	serine/threonine-protein kinase ATG1-like	#N/A	GO:0005524//ATP binding;GO:0004672//protein kinase activity	NA	K08269//serine/threonine-protein kinase ULK2 [EC:2.7.11.1]	NA	4.333	gene
104893816	translocon at the outer membrane of chloroplasts 64	GO:0016021//integral component of membrane	NA	NA	K01426//amidase [EC:3.5.1.4]	NA	-1.977	gene
104893815	serine/threonine-protein kinase EDR1-like	#N/A	GO:0005524//ATP binding;GO:0004672//protein kinase activity	NA	K04424//sterile alpha motif and leucine zipper containing kinase AZK [EC:2.7.11.25]	-0.163	-4.329	both
104893772	aspartic proteinase-like protein 2	GO:0016021//integral component of membrane	GO:0004190//aspartic-type endopeptidase activity	NA	K00924	NA	-1.434	gene
104893770	cleavage stimulation factor subunit 77	GO:0005634//nucleus	NA	GO:0006397//mRNA processing	K14408//cleavage stimulation factor subunit 3	NA	-2.795	gene
104893769	histone-lysine N-methyltransferase ATX2	GO:0005634//nucleus	GO:0046872//metal ion binding	NA	K11380;K11348//bromodomain and PHD finger-containing protein 1;K11422//histone-lysine N-methyltransferase SETD1 [EC:2.1.1.43]	NA	-5.092	gene
104893763	nifU-like protein 4, mitochondrial	#N/A	GO:0005506//iron ion binding;GO:0051536//iron-sulfur cluster binding	GO:0016226//iron-sulfur cluster assembly	K22074//NFU1 iron-sulfur cluster scaffold homolog, mitochondrial	NA	-3.641	gene
104893760	signal peptide peptidase-like 3	GO:0016021//integral component of membrane	GO:0004190//aspartic-type endopeptidase activity	NA	K09597//signal peptide peptidase-like 2B [EC:3.4.23.-]	NA	6.408	gene
104893682	phosphoethanolamine N-methyltransferase	#N/A	GO:0000234//phosphoethanolamine N-methyltransferase activity	GO:0006656//phosphatidylcholine biosynthetic process;GO:0032259//methylation	K05929//phosphoethanolamine N-methyltransferase [EC:2.1.1.103]	NA	2.904	gene
104893681	golgin candidate 2	NA	NA	GO:0007030//Golgi organization	K20478//golgin subfamily B member 1	NA	1.967	gene
104893675	auxin transporter-like protein 4	GO:0016021//integral component of membrane	NA	NA	K13946//auxin influx carrier (AUX1 LAX family)	NA	-1.448	gene
104893674	OTU domain-containing protein At3g57810	#N/A	GO:0004843//thiol-dependent ubiquitin-specific protease activity	GO:0030433//ubiquitin-dependent ERAD pathway;GO:0016579//protein deubiquitination	K18342//OTU domain-containing protein 6 [EC:3.4.19.12]	NA	1.849	gene
104893672	ribonuclease II, chloroplastic/mitochondrial	#N/A	GO:0003723//RNA binding;GO:0004540//ribonuclease activity	NA	K01147	0.814	-4.186	both
104893661	ATP-dependent DNA helicase SRS2-like protein At4g25120	#N/A	GO:0003677//DNA binding;GO:0005524//ATP binding;GO:0003678//DNA helicase activity	NA	K03657	NA	-5.511	gene
104893656	probable protein S-acyltransferase 16	GO:0016021//integral component of membrane	GO:0019706//protein-cysteine S-palmitoyltransferase activity	NA	K20029//palmitoyltransferase ZDHHC3/7/25 [EC:2.3.1.225]	NA	-1.042	gene
104893652	UNC93-like protein 3	GO:0016021//integral component of membrane	NA	NA	NA	NA	-2.699	gene
104893644	vacuolar protein sorting-associated protein 18 homolog	#N/A	NA	GO:0006886//intracellular protein transport;GO:0016192//vesicle-mediated transport	K20181//vacuolar protein sorting-associated protein 18	NA	-5.015	gene
104893624	sn1-specific diacylglycerol lipase beta	GO:0016021//integral component of membrane	NA	GO:0006629//lipid metabolic process	K13806//sn1-specific diacylglycerol lipase [EC:3.1.1.-];K02154//V-type H+-transporting ATPase subunit a	NA	-1.724	gene
104893623	petal death protein	GO:0009507//chloroplast	GO:0003824//catalytic activity	NA	K01637//isocitrate lyase [EC:4.1.3.1]	NA	-4.32	gene
104893621	probable ADP-ribosylation factor GTPase-activating protein AGD6	#N/A	GO:0046872//metal ion binding;GO:0005096//GTPase activator activity	NA	K12492//ADP-ribosylation factor GTPase-activating protein 1	NA	-2.59	gene
104893617	probable serine/threonine-protein kinase NAK	#N/A	GO:0004674//protein serine/threonine kinase activity;GO:0005524//ATP binding	NA	K04733//interleukin-1 receptor-associated kinase 4 [EC:2.7.11.1]	NA	1.15	gene
104893588	developmentally-regulated G-protein 3	#N/A	GO:0005525//GTP binding	NA	K06944//uncharacterized protein	NA	3.757	gene
104893573	zinc finger protein VAR3, chloroplastic-like	#N/A	GO:0046872//metal ion binding	NA	K02350//DNA polymerase zeta [EC:2.7.7.7]	NA	-3.582	gene
104893554	protein CASP	GO:0030173//integral component of Golgi membrane	NA	GO:0006891//intra-Golgi vesicle-mediated transport	K09313//homeobox protein cut-like	NA	4.269	gene
104893493	conserved oligomeric Golgi complex subunit 2	GO:0016020//membrane	NA	GO:0007030//Golgi organization;GO:0015031//protein transport	K20289//conserved oligomeric Golgi complex subunit 2	-2.187	-1.531	both
104893479	probable inactive purple acid phosphatase 27	NA	GO:0046872//metal ion binding;GO:0003993//acid phosphatase activity	NA	K22390//acid phosphatase type 7	NA	-1.707	gene
104893418	lysosomal beta glucosidase-like	#N/A	GO:0008422//beta-glucosidase activity	GO:0009251//glucan catabolic process	K05349//beta-glucosidase [EC:3.2.1.21]	NA	3.124	gene
104893407	nucleolar MIF4G domain-containing protein 1	#N/A	GO:0003723//RNA binding	NA	K17583//nucleolar MIF4G domain-containing protein 1	NA	-4.388	gene
104893391	probable 2-aminoethanethiol dioxygenase	#N/A	GO:0016702//oxidoreductase activity, acting on single donors with incorporation of molecular oxygen, incorporation of two atoms of oxygen;GO:0047800//cysteamine dioxygenase activity	NA	K10712//cysteamine dioxygenase [EC:1.13.11.19]	NA	-1.178	gene
104893380	cationic amino acid transporter 4, vacuolar-like	GO:0016021//integral component of membrane	GO:0022857//transmembrane transporter activity	NA	K13863//solute carrier family 7 (cationic amino acid transporter), member 1	NA	2.013	gene
104893371	exocyst complex component SEC3A	GO:0000145//exocyst;GO:0005886//plasma membrane	GO:0017049//GTP-Rho binding;GO:0005546//phosphatidylinositol-4,5-bisphosphate binding	GO:0051601//exocyst localization;GO:0006893//Golgi to plasma membrane transport;GO:0006887//exocytosis	K19983//exocyst complex component 1	1.789	1.248	both
104893314	aspartic proteinase nepenthesin-1-like	NA	GO:0004190//aspartic-type endopeptidase activity	NA	K01381//saccharopepsin [EC:3.4.23.25]	NA	-1.208	gene
104893251	floral homeotic protein PMADS 2-like	GO:0005634//nucleus	GO:0000977//RNA polymerase II transcription regulatory region sequence-specific DNA binding;GO:0003700//DNA-binding transcription factor activity;GO:0046983//protein dimerization activity	GO:0045944//positive regulation of transcription by RNA polymerase II	K09264//MADS-box transcription factor, plant	3.082	NA	promoter
104893235	chlorophyllide a oxygenase, chloroplastic	#N/A	GO:0051537//2 iron, 2 sulfur cluster binding;GO:0005506//iron ion binding;GO:0010277//chlorophyllide a oxygenase [overall] activity	NA	K13600	NA	-1.339	gene
104893224	N(6)-adenine-specific DNA methyltransferase 2	GO:0005737//cytoplasm	GO:0016279//protein-lysine N-methyltransferase activity;GO:0003676//nucleic acid binding	NA	K22855//EEF1A lysine methyltransferase 1 [EC:2.1.1.-]	NA	-2.491	gene
104893216	ubiquitin carboxyl-terminal hydrolase 12-like	#N/A	GO:0036459//thiol-dependent ubiquitinyl hydrolase activity	GO:0006511//ubiquitin-dependent protein catabolic process;GO:0016579//protein deubiquitination	K11838//ubiquitin carboxyl-terminal hydrolase 7 [EC:3.4.19.12]	NA	1.402	gene
104893210	D-lactate dehydrogenase [cytochrome], mitochondrial	GO:0005739//mitochondrion	GO:0008720//D-lactate dehydrogenase activity;GO:0004458//D-lactate dehydrogenase (cytochrome) activity;GO:0050660//flavin adenine dinucleotide binding;GO:0071949//FAD binding	GO:1903457//lactate catabolic process	K00102//D-lactate dehydrogenase (cytochrome) [EC:1.1.2.4]	NA	1.53	gene
104893198	ABC transporter G family member 22	GO:0016021//integral component of membrane	GO:0005524//ATP binding;GO:0016887//ATPase activity	NA	K05681//ATP-binding cassette, subfamily G (WHITE), member 2	NA	-1.328	gene
104893196	dolichyl-diphosphooligosaccharide--protein glycosyltransferase subunit DAD1	GO:0008250//oligosaccharyltransferase complex;GO:0016021//integral component of membrane	NA	GO:0006486//protein glycosylation;GO:0006487//protein N-linked glycosylation	K12668//oligosaccharyltransferase complex subunit epsilon	3.106	NA	promoter
104893195	NAD kinase 2, chloroplastic	NA	GO:0003951//NAD+ kinase activity	GO:0006741//NADP biosynthetic process;GO:0019674//NAD metabolic process	K00858//NAD+ kinase [EC:2.7.1.23]	NA	-1.087	gene
104893185	iron-sulfur cluster co-chaperone protein HscB, mitochondrial	NA	GO:0001671//ATPase activator activity;GO:0051087//chaperone binding	GO:0097428//protein maturation by iron-sulfur cluster transfer;GO:0051259//protein complex oligomerization	K04082//molecular chaperone HscB	NA	1.806	gene
104893176	ubiquitin carboxyl-terminal hydrolase 8-like	GO:0016021//integral component of membrane	GO:0036459//thiol-dependent ubiquitinyl hydrolase activity	GO:0006511//ubiquitin-dependent protein catabolic process;GO:0016579//protein deubiquitination	K21343//ubiquitin carboxyl-terminal hydrolase 15 [EC:3.4.19.12]	NA	-2.619	gene
104893173	protein translocase subunit SECA2, chloroplastic	GO:0016020//membrane;GO:0009941//chloroplast envelope	GO:0015462//ATPase-coupled protein transmembrane transporter activity;GO:0005524//ATP binding	GO:0006605//protein targeting;GO:0017038//protein import;GO:0009793//embryo development ending in seed dormancy	K03070	NA	4.688	gene
104893171	putative phosphatidylglycerol/phosphatidylinositol transfer protein DDB_G0282179	NA	GO:0032934//sterol binding	GO:0015918//sterol transport;GO:0032366//intracellular sterol transport	NA	NA	2.857	gene
104893170	aldo-keto reductase family 4 member C9-like	#N/A	GO:0016491//oxidoreductase activity	NA	K00002//alcohol dehydrogenase (NADP+) [EC:1.1.1.2]	-1.671	NA	promoter
104893169	aldo-keto reductase family 4 member C9-like	#N/A	GO:0016491//oxidoreductase activity	NA	K00002//alcohol dehydrogenase (NADP+) [EC:1.1.1.2]	NA	-1.557	gene
104893164	putative deoxyribonuclease TATDN1	NA	GO:0016788//hydrolase activity, acting on ester bonds	NA	K03424//TatD DNase family protein [EC:3.1.21.-]	NA	1.347	gene
104893144	heat shock cognate 70 kDa protein-like	GO:0005737//cytoplasm	GO:0051787//misfolded protein binding;GO:0005524//ATP binding;GO:0051082//unfolded protein binding;GO:0031072//heat shock protein binding;GO:0044183//protein folding chaperone;GO:0016887//ATPase activity	GO:0006986//response to unfolded protein;GO:0051085//chaperone cofactor-dependent protein refolding;GO:0034620//cellular response to unfolded protein;GO:0042026//protein refolding	K03283//heat shock 70kDa protein 1/2/6/8	NA	1.493	gene
104893142	cycloartenol synthase 2	GO:0005811//lipid droplet	GO:0042300//beta-amyrin synthase activity;GO:0000250//lanosterol synthase activity	GO:0016104//triterpenoid biosynthetic process	K01853//cycloartenol synthase [EC:5.4.99.8]	NA	-4.171	gene
104893137	LRR receptor-like serine/threonine-protein kinase FEI 2	GO:0016021//integral component of membrane	GO:0004674//protein serine/threonine kinase activity;GO:0005524//ATP binding;GO:0004714//transmembrane receptor protein tyrosine kinase activity	GO:0030244//cellulose biosynthetic process	K04733//interleukin-1 receptor-associated kinase 4 [EC:2.7.11.1]	NA	-2.714	gene
104893118	urea-proton symporter DUR3	GO:0016021//integral component of membrane;GO:0005886//plasma membrane	GO:0015204//urea transmembrane transporter activity	GO:0071918//urea transmembrane transport	K20989//urea-proton symporter	2.17	2.17	both
104893072	mechanosensitive ion channel protein 10-like	GO:0016021//integral component of membrane;GO:0005886//plasma membrane	NA	GO:0055085//transmembrane transport	K22048	NA	-2.591	gene
104893063	DEAD-box ATP-dependent RNA helicase 5	NA	GO:0005524//ATP binding;GO:0004386//helicase activity;GO:0003676//nucleic acid binding	NA	K14811//ATP-dependent RNA helicase DBP3 [EC:3.6.4.13]	NA	1.368	gene
104893062	secretory carrier-associated membrane protein 4	GO:0030658//transport vesicle membrane;GO:0016021//integral component of membrane;GO:0005886//plasma membrane	NA	GO:0015031//protein transport	K19995//secretory carrier-associated membrane protein	NA	-2.118	gene
104893056	CSC1-like protein At1g32090	GO:0009506//plasmodesma;GO:0005794//Golgi apparatus;GO:0016021//integral component of membrane;GO:0005886//plasma membrane	GO:0008381//mechanosensitive ion channel activity	NA	K21989//calcium permeable stress-gated cation channel	NA	3.678	gene
104893033	glycerol-3-phosphate acyltransferase, chloroplastic	GO:0009570//chloroplast stroma	GO:0004366//glycerol-3-phosphate O-acyltransferase activity;GO:0102420//sn-1-glycerol-3-phosphate C16:0-DCA-CoA acyl transferase activity	GO:0016024//CDP-diacylglycerol biosynthetic process	K00630	NA	3.586	gene
104893023	homeobox-leucine zipper protein HDG5	GO:0005634//nucleus	GO:0008289//lipid binding;GO:0043565//sequence-specific DNA binding	GO:0006355//regulation of transcription, DNA-templated	K09338//homeobox-leucine zipper protein	NA	-3.991	gene
104893012	phosphoethanolamine N-methyltransferase-like	NA	GO:0000234//phosphoethanolamine N-methyltransferase activity	GO:0006656//phosphatidylcholine biosynthetic process	K05929//phosphoethanolamine N-methyltransferase [EC:2.1.1.103]	NA	-1.263	gene
104893011	histone-lysine N-methyltransferase CLF	GO:0031519//PcG protein complex	NA	NA	K11430//histone-lysine N-methyltransferase EZH2 [EC:2.1.1.43]	NA	2.004	gene
104893008	heat shock factor protein HSF8-like	GO:0042025//host cell nucleus;GO:0005634//nucleus	GO:0043565//sequence-specific DNA binding;GO:0003700//DNA-binding transcription factor activity	NA	K09419//heat shock transcription factor, other eukaryote	NA	1.199	gene
104893000	alpha,alpha-trehalose-phosphate synthase [UDP-forming] 5	GO:0005829//cytosol;GO:0005737//cytoplasm	GO:0003824//catalytic activity	GO:0005992//trehalose biosynthetic process	K16055//trehalose 6-phosphate synthase/phosphatase [EC:2.4.1.15 3.1.3.12]	NA	1.62	gene
104892969	tobamovirus multiplication protein 2A	GO:0016021//integral component of membrane	NA	NA	K17345//tetraspanin-5;K17353//tetraspanin-18	NA	-3.473	gene
104892949	sister chromatid cohesion 1 protein 2-like	GO:0008278//cohesin complex	NA	GO:0007062//sister chromatid cohesion	K06670//cohesin complex subunit SCC1	NA	3.252	gene
104892948	GDSL esterase/lipase At1g71250	GO:0016021//integral component of membrane	GO:0016298//lipase activity;GO:0016788//hydrolase activity, acting on ester bonds	GO:0006629//lipid metabolic process	K10691//E3 ubiquitin-protein ligase UBR4 [EC:2.3.2.27];K14209//solute carrier family 36 (proton-coupled amino acid transporter);K01188//beta-glucosidase [EC:3.2.1.21];K00679;K01206//alpha-L-fucosidase [EC:3.2.1.51]	-2.504	-2.504	both
104892942	pyruvate kinase isozyme G, chloroplastic	#N/A	GO:0030955//potassium ion binding;GO:0000287//magnesium ion binding;GO:0004743//pyruvate kinase activity;GO:0016301//kinase activity	NA	K00873//pyruvate kinase [EC:2.7.1.40]	NA	4.332	gene
104892934	ferredoxin	#N/A	GO:0009055//electron transfer activity;GO:0051536//iron-sulfur cluster binding	NA	K02639//ferredoxin	NA	-2.412	gene
104892933	ruvB-like protein 1	GO:0035267//NuA4 histone acetyltransferase complex;GO:0031011//Ino80 complex;GO:0097255//R2TP complex	GO:0043139//5'-3' DNA helicase activity;GO:0005524//ATP binding	NA	K04499//RuvB-like protein 1 (pontin 52)	-2.412	NA	promoter
104892931	protein LE25-like	#N/A	NA	GO:0009793//embryo development ending in seed dormancy	NA	1.556	NA	promoter
104892896	probable purine permease 11	GO:0016021//integral component of membrane	GO:0015211//purine nucleoside transmembrane transporter activity	NA	K00850//6-phosphofructokinase 1 [EC:2.7.1.11];K07893//Ras-related protein Rab-6A	NA	-1.486	gene
104892888	regulator of nonsense transcripts 1 homolog	GO:0005737//cytoplasm	GO:0003677//DNA binding;GO:0005524//ATP binding;GO:0008270//zinc ion binding;GO:0004386//helicase activity	GO:0000184//nuclear-transcribed mRNA catabolic process, nonsense-mediated decay	K14326//regulator of nonsense transcripts 1 [EC:3.6.4.-]	NA	2.416	gene
104892868	single-stranded DNA-bindig protein WHY2, mitochondrial	NA	GO:0003697//single-stranded DNA binding	GO:0006355//regulation of transcription, DNA-templated;GO:0006952//defense response	K14573//nucleolar protein 4	NA	5.739	gene
104892844	RING-H2 finger protein ATL7	GO:0016021//integral component of membrane	NA	NA	K19039	NA	6.058	gene
104892841	transcription factor bHLH125-like	NA	GO:0003677//DNA binding;GO:0046983//protein dimerization activity	GO:0006357//regulation of transcription by RNA polymerase II	NA	NA	1.84	gene
104892838	serine/threonine-protein kinase SAPK3-like	GO:0005634//nucleus;GO:0005737//cytoplasm	GO:0004674//protein serine/threonine kinase activity;GO:0005524//ATP binding	GO:0006468//protein phosphorylation;GO:0035556//intracellular signal transduction	K14498//serine/threonine-protein kinase SRK2 [EC:2.7.11.1]	NA	-2.695	gene
104892835	glucan endo-1,3-beta-glucosidase 4-like	GO:0016021//integral component of membrane;GO:0046658//anchored component of plasma membrane	GO:0003723//RNA binding;GO:0004553//hydrolase activity, hydrolyzing O-glycosyl compounds	GO:0005975//carbohydrate metabolic process	K19892	-1.022	NA	promoter
104892826	ATP-dependent Clp protease proteolytic subunit-related protein 4, chloroplastic	#N/A	GO:0004252//serine-type endopeptidase activity	NA	K01358//ATP-dependent Clp protease, protease subunit [EC:3.4.21.92]	NA	-1.938	gene
104892821	GATA transcription factor 26	#N/A	GO:0008270//zinc ion binding;GO:0043565//sequence-specific DNA binding	GO:0006355//regulation of transcription, DNA-templated	NA	2.348	NA	promoter
104892793	ferredoxin-thioredoxin reductase, variable chain, chloroplastic-like	GO:0009507//chloroplast	GO:0016491//oxidoreductase activity	GO:0055114//oxidation-reduction process;GO:0015979//photosynthesis	K03644//lipoyl synthase [EC:2.8.1.8]	19.185	NA	promoter
104892785	eukaryotic translation initiation factor 2D	NA	GO:0003743//translation initiation factor activity	GO:0001731//formation of translation preinitiation complex	K15027//translation initiation factor 2D	NA	1.882	gene
104892767	phosphatidylserine decarboxylase proenzyme 1, mitochondrial	GO:0031305//integral component of mitochondrial inner membrane	GO:0004609//phosphatidylserine decarboxylase activity	GO:0006646//phosphatidylethanolamine biosynthetic process;GO:0016540//protein autoprocessing	K01613//phosphatidylserine decarboxylase [EC:4.1.1.65]	NA	1.17	gene
104892764	formyltetrahydrofolate deformylase 2, mitochondrial	NA	GO:0008864//formyltetrahydrofolate deformylase activity;GO:0016742//hydroxymethyl-, formyl- and related transferase activity	GO:0006189//'de novo' IMP biosynthetic process	K01433//formyltetrahydrofolate deformylase [EC:3.5.1.10]	NA	-2.958	gene
104892743	dentin sialophosphoprotein	GO:0016021//integral component of membrane	NA	NA	NA	NA	2.478	gene
104892736	histidine--tRNA ligase	NA	GO:0004821//histidine-tRNA ligase activity;GO:0005524//ATP binding	GO:0006427//histidyl-tRNA aminoacylation	K01892//histidyl-tRNA synthetase [EC:6.1.1.21]	NA	22.007	gene
104892731	54S ribosomal protein L39, mitochondrial-like	GO:0005840//ribosome;GO:0016021//integral component of membrane	GO:0003735//structural constituent of ribosome	GO:0006412//translation	K02913//large subunit ribosomal protein L33	NA	2.102	gene
104892728	WAT1-related protein At1g43650-like	GO:0016021//integral component of membrane;GO:0005886//plasma membrane	GO:0022857//transmembrane transporter activity	NA	K17500//integrin-linked kinase-associated serine/threonine phosphatase 2C [EC:3.1.3.16]	-1.4	5.635	both
104892694	probable glucan 1,3-beta-glucosidase A	NA	GO:0051015//actin filament binding;GO:0004553//hydrolase activity, hydrolyzing O-glycosyl compounds	GO:0007015//actin filament organization;GO:0005975//carbohydrate metabolic process	K04733//interleukin-1 receptor-associated kinase 4 [EC:2.7.11.1];K01210	NA	-2.645	gene
104892679	AP2/ERF and B3 domain-containing transcription factor At1g50680-like	GO:0005634//nucleus	GO:0003677//DNA binding;GO:0003700//DNA-binding transcription factor activity	NA	K09287//RAV-like factor	3.858	NA	promoter
104892668	ABC transporter C family member 10-like	GO:0016021//integral component of membrane	GO:0005524//ATP binding;GO:0042626//ATPase-coupled transmembrane transporter activity;GO:0016887//ATPase activity	NA	K05666//ATP-binding cassette, subfamily C (CFTR/MRP), member 2	NA	-4.202	gene
104892655	probable methyltransferase PMT17	GO:0005768//endosome;GO:0005794//Golgi apparatus;GO:0016021//integral component of membrane;GO:0005802//trans-Golgi network;GO:0005737//cytoplasm	GO:0008168//methyltransferase activity	GO:0032259//methylation	K12175//COP9 signalosome complex subunit 1;K15449//tRNA wybutosine-synthesizing protein 1 [EC:4.1.3.44]	NA	-2.079	gene
104892638	mediator of RNA polymerase II transcription subunit 31-like	GO:0016592//mediator complex	GO:0003712//transcription coregulator activity	GO:0006355//regulation of transcription, DNA-templated	K15153//mediator of RNA polymerase II transcription subunit 31	NA	2.267	gene
104892631	DEAD-box ATP-dependent RNA helicase 36	GO:0005634//nucleus;GO:0090406//pollen tube	GO:0003723//RNA binding;GO:0005524//ATP binding;GO:0003724//RNA helicase activity;GO:0004386//helicase activity;GO:0003676//nucleic acid binding	GO:0009791//post-embryonic development;GO:0009561//megagametogenesis;GO:0006364//rRNA processing	K14778//ATP-dependent RNA helicase DDX49/DBP8 [EC:3.6.4.13]	NA	1.946	gene
104892630	endoglucanase 1-like	NA	GO:0008810//cellulase activity	GO:0030245//cellulose catabolic process	K01179//endoglucanase [EC:3.2.1.4]	NA	-1.753	gene
104892625	mediator of RNA polymerase II transcription subunit 10b-like	GO:0016592//mediator complex	GO:0003712//transcription coregulator activity	GO:0006357//regulation of transcription by RNA polymerase II	K15151//mediator of RNA polymerase II transcription subunit 10	NA	-5.596	gene
104892624	homeobox-leucine zipper protein ATHB-12-like	GO:0005634//nucleus	GO:0043565//sequence-specific DNA binding	GO:0006355//regulation of transcription, DNA-templated	K09338//homeobox-leucine zipper protein	-1.371	NA	promoter
104892621	methionine gamma-lyase	NA	GO:0018826//methionine gamma-lyase activity;GO:0003824//catalytic activity;GO:0030170//pyridoxal phosphate binding	GO:0019346//transsulfuration	K01761//methionine-gamma-lyase [EC:4.4.1.11]	NA	-1.806	gene
104892618	endoplasmic reticulum-Golgi intermediate compartment protein 3-like	GO:0016021//integral component of membrane	NA	NA	K20367//endoplasmic reticulum-Golgi intermediate compartment protein 3	NA	3.073	gene
104892615	metal-nicotianamine transporter YSL1-like	GO:0016021//integral component of membrane	NA	GO:0055085//transmembrane transport	K03687//molecular chaperone GrpE;K15363//fanconi-associated nuclease 1 [EC:3.1.21.- 3.1.4.1];K01807//ribose 5-phosphate isomerase A [EC:5.3.1.6]	2.458	NA	promoter
104892611	serine/threonine-protein kinase BLUS1	#N/A	GO:0005524//ATP binding;GO:0004672//protein kinase activity	NA	K08835//serine/threonine-protein kinase OSR1/STK39 [EC:2.7.11.1]	NA	20.564	gene
104892600	molybdate-anion transporter	GO:0016021//integral component of membrane	GO:0015098//molybdate ion transmembrane transporter activity	NA	K15104//solute carrier family 25 (mitochondrial oxoglutarate transporter), member 11;K07374//tubulin alpha	1.393	NA	promoter
104892599	mavicyanin	GO:0046658//anchored component of plasma membrane	GO:0009055//electron transfer activity	NA	K04733//interleukin-1 receptor-associated kinase 4 [EC:2.7.11.1];K03006//DNA-directed RNA polymerase II subunit RPB1 [EC:2.7.7.6]	2.006	NA	promoter
104892576	probable trehalase	NA	GO:0004555//alpha,alpha-trehalase activity	GO:0005991//trehalose metabolic process	K01194//alpha,alpha-trehalase [EC:3.2.1.28]	NA	-1.299	gene
104892571	protein root UVB sensitive 3	GO:0016021//integral component of membrane	NA	NA	NA	NA	2.858	gene
104892567	AP-4 complex subunit epsilon	GO:0030124//AP-4 adaptor complex;GO:0005794//Golgi apparatus;GO:0016021//integral component of membrane	NA	GO:0006886//intracellular protein transport;GO:0016192//vesicle-mediated transport	K12400//AP-4 complex subunit epsilon-1	NA	2.116	gene
104892537	ubiquitin-activating enzyme E1 1-like	NA	GO:0008641//ubiquitin-like modifier activating enzyme activity;GO:0005524//ATP binding	GO:0006464//cellular protein modification process	K03178//ubiquitin-activating enzyme E1 [EC:6.2.1.45]	-1.147	NA	promoter
104892525	zinc finger CCCH domain-containing protein 1-like	#N/A	GO:0046872//metal ion binding	NA	K13127//RING finger protein 113A	NA	-2.096	gene
104892511	AMP deaminase	#N/A	GO:0003876//AMP deaminase activity	GO:0032264//IMP salvage	K01490//AMP deaminase [EC:3.5.4.6]	NA	-2.109	gene
104892510	protein SCO1 homolog 1, mitochondrial	GO:0005743//mitochondrial inner membrane;GO:0016021//integral component of membrane	GO:0005507//copper ion binding	GO:0006878//cellular copper ion homeostasis;GO:0008535//respiratory chain complex IV assembly;GO:0006825//copper ion transport;GO:0045454//cell redox homeostasis	K07152//protein SCO1/2	NA	-1.182	gene
104892507	monothiol glutaredoxin-S16, chloroplastic	#N/A	GO:0015035//protein disulfide oxidoreductase activity;GO:0009055//electron transfer activity	GO:0045454//cell redox homeostasis	K07390//monothiol glutaredoxin	2.007	NA	promoter
104892504	transcription factor TGA4-like	#N/A	GO:0043565//sequence-specific DNA binding	GO:0006351//transcription, DNA-templated	K14431//transcription factor TGA	NA	2.991	gene
104892495	calcium-dependent protein kinase 13	GO:0005886//plasma membrane	GO:0004674//protein serine/threonine kinase activity;GO:0005524//ATP binding;GO:0004672//protein kinase activity;GO:0005509//calcium ion binding	GO:0046777//protein autophosphorylation	K13412//calcium-dependent protein kinase [EC:2.7.11.1]	2.39	NA	promoter
104892469	WAT1-related protein At5g45370	GO:0016021//integral component of membrane	GO:0022857//transmembrane transporter activity	NA	K17500//integrin-linked kinase-associated serine/threonine phosphatase 2C [EC:3.1.3.16]	NA	4.264	gene
104892452	probable anion transporter 3, chloroplastic	GO:0016021//integral component of membrane	GO:0022857//transmembrane transporter activity	NA	K08193//MFS transporter, ACS family, solute carrier family 17 (sodium-dependent inorganic phosphate cotransporter), other	NA	1.738	gene
104892449	DEAD-box ATP-dependent RNA helicase 27-like	NA	GO:0003723//RNA binding;GO:0005524//ATP binding;GO:0003724//RNA helicase activity	NA	K13179//ATP-dependent RNA helicase DDX18/HAS1 [EC:3.6.4.13]	NA	1.016	gene
104892438	maspardin	GO:0016021//integral component of membrane	NA	NA	K19367//maspardin	NA	1.256	gene
104892427	SNARE-interacting protein KEULE	NA	NA	GO:0006904//vesicle docking involved in exocytosis	K15292//syntaxin-binding protein 1	NA	-2.165	gene
104892425	sugar transport protein 5-like	#N/A	GO:0004523//RNA-DNA hybrid ribonuclease activity;GO:0003676//nucleic acid binding	NA	K14318//nuclear pore complex protein Nup88;K07904//Ras-related protein Rab-11A;K01188//beta-glucosidase [EC:3.2.1.21];K22804//structural maintenance of chromosomes protein 6;K00430//peroxidase [EC:1.11.1.7];K02218//casein kinase 1 [EC:2.7.11.1];K05291//phosphatidylinositol glycan, class S;K08150//MFS transporter, SP family, solute carrier family 2 (myo-inositol transporter), member 13;K08145//MFS…	NA	1.669	gene
104892421	methylsterol monooxygenase 1-1-like	GO:0016021//integral component of membrane	GO:0005506//iron ion binding;GO:0016491//oxidoreductase activity	GO:0008610//lipid biosynthetic process	K14423	NA	-2.783	gene
104892416	protein cornichon homolog 4	GO:0016021//integral component of membrane	NA	GO:0016192//vesicle-mediated transport	K20368//protein cornichon	NA	1.864	gene
104892415	ATP-dependent Clp protease proteolytic subunit-related protein 2, chloroplastic	#N/A	GO:0004252//serine-type endopeptidase activity	NA	K01358//ATP-dependent Clp protease, protease subunit [EC:3.4.21.92]	2.762	NA	promoter
104892412	MATE efflux family protein 5	GO:0016021//integral component of membrane	GO:0015297//antiporter activity;GO:0042910//xenobiotic transmembrane transporter activity	NA	K03327//multidrug resistance protein, MATE family	NA	2.142	gene
104892411	clp protease-related protein At4g12060, chloroplastic	#N/A	NA	GO:0019538//protein metabolic process	K03696//ATP-dependent Clp protease ATP-binding subunit ClpC	NA	4.379	gene
104892410	putative cyclic nucleotide-gated ion channel 8	GO:0016021//integral component of membrane	GO:0005216//ion channel activity	NA	K05391//cyclic nucleotide gated channel, plant	NA	2.357	gene
104892402	protein TIC 20-I, chloroplastic-like	GO:0016021//integral component of membrane;GO:0031969//chloroplast membrane	NA	NA	NA	NA	2.416	gene
104892383	transcription factor bHLH126-like	#N/A	GO:0003677//DNA binding;GO:0046983//protein dimerization activity	GO:0006357//regulation of transcription by RNA polymerase II	K18486//heart-and neural crest derivatives-expressed protein 2	-1.042	3.408	both
104892379	PGR5-like protein 1A, chloroplastic	GO:0009535//chloroplast thylakoid membrane;GO:0016021//integral component of membrane	GO:0016730//oxidoreductase activity, acting on iron-sulfur proteins as donors	GO:0009773//photosynthetic electron transport in photosystem I	NA	NA	3.922	gene
104892373	glycerol-3-phosphate acyltransferase 5-like	GO:0016021//integral component of membrane	GO:0016746//transferase activity, transferring acyl groups	NA	K13508	NA	3.868	gene
104892362	phospholipase D beta 1-like	GO:0016020//membrane	GO:0004630//phospholipase D activity;GO:0005509//calcium ion binding;GO:0070290//N-acylphosphatidylethanolamine-specific phospholipase D activity	GO:0046470//phosphatidylcholine metabolic process;GO:0016042//lipid catabolic process	K01115//phospholipase D1/2 [EC:3.1.4.4]	NA	2.65	gene
104892357	SPX domain-containing membrane protein At4g22990-like	GO:0016021//integral component of membrane	GO:0022857//transmembrane transporter activity	NA	NA	NA	1.457	gene
104892355	SPX domain-containing membrane protein At4g22990-like	GO:0016021//integral component of membrane	GO:0022857//transmembrane transporter activity	NA	NA	3.897	NA	promoter
104892354	DNA-directed RNA polymerase IV subunit 1	NA	GO:0003899//DNA-directed 5'-3' RNA polymerase activity;GO:0003677//DNA binding	GO:0006351//transcription, DNA-templated	K16250	NA	-5.586	gene
104892351	monothiol glutaredoxin-S15, mitochondrial	NA	GO:0015035//protein disulfide oxidoreductase activity;GO:0009055//electron transfer activity	GO:0045454//cell redox homeostasis	K07390//monothiol glutaredoxin	NA	1.82	gene
104892341	probable mitochondrial adenine nucleotide transporter BTL3	GO:0016021//integral component of membrane	GO:0005347//ATP transmembrane transporter activity	NA	K14684//solute carrier family 25 (mitochondrial phosphate transporter), member 23/24/25/41	NA	2.059	gene
104892336	phosphatidylinositol glycan anchor biosynthesis class U protein-like	GO:0042765//GPI-anchor transamidase complex	NA	GO:0016255//attachment of GPI anchor to protein	K05293//phosphatidylinositol glycan, class U	2.891	NA	promoter
104892334	adenylate kinase isoenzyme 6 homolog	GO:0005634//nucleus	GO:0005524//ATP binding;GO:0004017//adenylate kinase activity;GO:0016887//ATPase activity	NA	K18532//adenylate kinase [EC:2.7.4.3]	NA	1.056	gene
104892328	replication factor C subunit 2	#N/A	GO:0003677//DNA binding;GO:0005524//ATP binding	GO:0006260//DNA replication	K10755//replication factor C subunit 2/4	2.596	NA	promoter
104892325	heat stress transcription factor B-2b-like	GO:0042025//host cell nucleus;GO:0005634//nucleus	GO:0043565//sequence-specific DNA binding;GO:0003700//DNA-binding transcription factor activity	NA	K09419//heat shock transcription factor, other eukaryote	-1.081	NA	promoter
104892273	AT-rich interactive domain-containing protein 2-like	GO:0005634//nucleus	GO:0003677//DNA binding	NA	K02470	-1.786	NA	promoter
104892256	pentatricopeptide repeat-containing protein At2g04860-like	GO:0043231//intracellular membrane-bounded organelle	NA	GO:0009451//RNA modification	K01176//alpha-amylase [EC:3.2.1.1]	NA	-1.504	gene
104892243	2-C-methyl-D-erythritol 2,4-cyclodiphosphate synthase, chloroplastic	#N/A	GO:0008685//2-C-methyl-D-erythritol 2,4-cyclodiphosphate synthase activity	GO:0016114//terpenoid biosynthetic process	K01770	NA	-21.259	gene
104892222	potassium transporter 7	GO:0016020//membrane;GO:0016021//integral component of membrane	GO:0015079//potassium ion transmembrane transporter activity	GO:0006813//potassium ion transport	K03549//KUP system potassium uptake protein	NA	-3.018	gene
104892214	tryptophan synthase beta chain 1-like	NA	GO:0004834//tryptophan synthase activity;GO:0030170//pyridoxal phosphate binding	NA	K06001//tryptophan synthase beta chain [EC:4.2.1.20]	NA	-1.751	gene
104892207	ABC transporter C family member 10-like	GO:0016021//integral component of membrane	GO:0005524//ATP binding;GO:0042626//ATPase-coupled transmembrane transporter activity;GO:0016887//ATPase activity	NA	K05666//ATP-binding cassette, subfamily C (CFTR/MRP), member 2	NA	-2.148	gene
104892201	probable inactive receptor kinase At4g23740	GO:0016021//integral component of membrane	GO:0005524//ATP binding;GO:0004672//protein kinase activity	NA	K04733//interleukin-1 receptor-associated kinase 4 [EC:2.7.11.1]	1.446	NA	promoter
104892193	serine/threonine-protein kinase HT1	#N/A	GO:0004674//protein serine/threonine kinase activity;GO:0005524//ATP binding	GO:0071244//cellular response to carbon dioxide	K17535//serine/threonine-protein kinase TNNI3K [EC:2.7.11.1]	NA	2.963	gene
104892183	probable GABA transporter 2	GO:0016021//integral component of membrane	NA	NA	K14209//solute carrier family 36 (proton-coupled amino acid transporter);K15015//solute carrier family 32 (vesicular inhibitory amino acid transporter)	NA	4.597	gene
104892163	DNA primase small subunit	#N/A	GO:0003896//DNA primase activity	NA	K02684//DNA primase small subunit [EC:2.7.7.102]	NA	-2.883	gene
104892155	mitochondrial inner membrane protein OXA1-like	GO:0016021//integral component of membrane	GO:0032977//membrane insertase activity	NA	K03217//YidC/Oxa1 family membrane protein insertase	NA	3.284	gene
104892147	dnaJ homolog subfamily C member 2-like	GO:0005634//nucleus	GO:0003677//DNA binding	NA	K09522//DnaJ homolog subfamily C member 2	NA	3.87	gene
104892144	ubiquitin carboxyl-terminal hydrolase isozyme L5	NA	GO:0004843//thiol-dependent ubiquitin-specific protease activity	GO:0006511//ubiquitin-dependent protein catabolic process;GO:0016579//protein deubiquitination	K05610//ubiquitin carboxyl-terminal hydrolase L5 [EC:3.4.19.12]	NA	1.296	gene
104892143	UDP-glucose 4-epimerase GEPI48-like	#N/A	GO:0003978//UDP-glucose 4-epimerase activity	GO:0006012//galactose metabolic process	K01784//UDP-glucose 4-epimerase [EC:5.1.3.2]	NA	1.484	gene
104892136	calcineurin B-like protein 7	NA	GO:0005509//calcium ion binding	NA	K06268//serine/threonine-protein phosphatase 2B regulatory subunit	NA	-8.02	gene
104892134	E3 ubiquitin-protein ligase SINAT5-like	GO:0042025//host cell nucleus	GO:0008270//zinc ion binding	GO:0006511//ubiquitin-dependent protein catabolic process;GO:0007275//multicellular organism development	K04506//E3 ubiquitin-protein ligase SIAH1 [EC:2.3.2.27]	NA	-6.719	gene
104892116	7-deoxyloganetin glucosyltransferase-like	#N/A	GO:0016758//transferase activity, transferring hexosyl groups	NA	K22706;K13030	NA	-1.568	gene
104892095	primary amine oxidase-like	GO:0016021//integral component of membrane	GO:0008131//primary amine oxidase activity;GO:0005507//copper ion binding;GO:0048038//quinone binding	GO:0009308//amine metabolic process	K00276//primary-amine oxidase [EC:1.4.3.21]	NA	-1.82	gene
104892090	primary amine oxidase-like	GO:0016021//integral component of membrane	GO:0008131//primary amine oxidase activity;GO:0005507//copper ion binding;GO:0048038//quinone binding	GO:0009308//amine metabolic process	K00276//primary-amine oxidase [EC:1.4.3.21]	NA	-1.237	gene
104892088	primary amine oxidase	GO:0016021//integral component of membrane	GO:0008131//primary amine oxidase activity;GO:0005507//copper ion binding;GO:0048038//quinone binding	GO:0009308//amine metabolic process	K00276//primary-amine oxidase [EC:1.4.3.21]	2.25	NA	promoter
104892083	protein ODORANT1-like	GO:0005634//nucleus	GO:0003677//DNA binding	NA	K09422//transcription factor MYB, plant	NA	-1.571	gene
104892065	elongation factor G-2, chloroplastic	GO:0009507//chloroplast	GO:0003746//translation elongation factor activity;GO:0005525//GTP binding;GO:0003924//GTPase activity	NA	K02355//elongation factor G	-1.177	NA	promoter
104892047	flavin-containing monooxygenase FMO GS-OX-like 4	NA	GO:0050661//NADP binding;GO:0004499//N,N-dimethylaniline monooxygenase activity;GO:0050660//flavin adenine dinucleotide binding	NA	K22324	NA	1.779	gene
104892046	probable inorganic phosphate transporter 1-4	GO:0016021//integral component of membrane	GO:0005315//inorganic phosphate transmembrane transporter activity	GO:0006817//phosphate ion transport	K08176//MFS transporter, PHS family, inorganic phosphate transporter	1.104	NA	promoter
104892045	adenine phosphoribosyltransferase 3	GO:0005737//cytoplasm	GO:0003999//adenine phosphoribosyltransferase activity	GO:0009116//nucleoside metabolic process;GO:0006168//adenine salvage	K00759//adenine phosphoribosyltransferase [EC:2.4.2.7]	NA	-2.183	gene
104892030	subtilisin-like protease SBT5.3	#N/A	GO:0004252//serine-type endopeptidase activity	NA	K12619//5'-3' exoribonuclease 2 [EC:3.1.13.-];K13199//plasminogen activator inhibitor 1 RNA-binding protein;K15333//tRNA guanosine-2'-O-methyltransferase [EC:2.1.1.34];K14568//rRNA small subunit pseudouridine methyltransferase Nep1 [EC:2.1.1.260]	NA	-2.44	gene
104892026	rRNA-processing protein EFG1-like	#N/A	NA	GO:0006364//rRNA processing	NA	1.583	NA	promoter
104892018	proteasome activator subunit 4	#N/A	GO:0016504//peptidase activator activity;GO:0070628//proteasome binding;GO:0070577//lysine-acetylated histone binding	NA	K06699//proteasome activator subunit 4	NA	2.626	gene
104892006	subtilisin-like protease SBT5.4	NA	GO:0004252//serine-type endopeptidase activity	NA	K12619//5'-3' exoribonuclease 2 [EC:3.1.13.-];K13199//plasminogen activator inhibitor 1 RNA-binding protein;K15333//tRNA guanosine-2'-O-methyltransferase [EC:2.1.1.34];K14568//rRNA small subunit pseudouridine methyltransferase Nep1 [EC:2.1.1.260]	NA	5.764	gene
104892003	uridine kinase-like protein 3	#N/A	GO:0004849//uridine kinase activity;GO:0005524//ATP binding	GO:0009116//nucleoside metabolic process;GO:0044206//UMP salvage;GO:0044211//CTP salvage	K00876//uridine kinase [EC:2.7.1.48]	-1.618	NA	promoter
104891995	disease resistance protein RPM1-like	#N/A	GO:0043531//ADP binding;GO:0005524//ATP binding	GO:0006952//defense response	K13457	NA	-20.648	gene
104891963	phospho-2-dehydro-3-deoxyheptonate aldolase 1, chloroplastic	GO:0009507//chloroplast	GO:0003849//3-deoxy-7-phosphoheptulonate synthase activity	GO:0009423//chorismate biosynthetic process;GO:0009073//aromatic amino acid family biosynthetic process	K01626//3-deoxy-7-phosphoheptulonate synthase [EC:2.5.1.54]	2.857	NA	promoter
104891908	LRR receptor-like serine/threonine-protein kinase FLS2	GO:0016021//integral component of membrane	NA	NA	K13466;K19613//leucine-rich repeat protein SHOC2	NA	5.319	gene
104891887	calcineurin B-like protein 2	NA	GO:0005509//calcium ion binding	NA	K06268//serine/threonine-protein phosphatase 2B regulatory subunit	1.709	NA	promoter
104891885	peptidyl-prolyl cis-trans isomerase FKBP16-1, chloroplastic	#N/A	GO:0003755//peptidyl-prolyl cis-trans isomerase activity	NA	K14826//FK506-binding nuclear protein [EC:5.2.1.8];K13429	2.124	NA	promoter
104891842	exopolygalacturonase-like	GO:0005576//extracellular region	GO:0004650//polygalacturonase activity	GO:0005975//carbohydrate metabolic process;GO:0071555//cell wall organization	K01213	-1.828	NA	promoter
104891834	30S ribosomal protein S10, chloroplastic	GO:0005840//ribosome;GO:0009507//chloroplast	GO:0003723//RNA binding;GO:0003735//structural constituent of ribosome	GO:0006412//translation	K02946//small subunit ribosomal protein S10	NA	-1.579	gene
104891769	glycine-rich cell wall structural protein 1.0-like	GO:0016021//integral component of membrane	GO:0005337//nucleoside transmembrane transporter activity	NA	K02184//formin 2	NA	3.751	gene
104891764	serine/threonine-protein phosphatase PP-X isozyme 2	#N/A	GO:0004721//phosphoprotein phosphatase activity	NA	K15423//serine/threonine-protein phosphatase 4 catalytic subunit [EC:3.1.3.16]	1.683	NA	promoter
104891753	phosphoinositide phosphatase SAC7-like	GO:0016021//integral component of membrane	GO:0052866//phosphatidylinositol phosphate phosphatase activity	NA	K21797//phosphatidylinositol 4-phosphatase [EC:3.1.3.-]	NA	-3.306	gene
104891749	phosphatidate cytidylyltransferase-like	GO:0016021//integral component of membrane;GO:0005789//endoplasmic reticulum membrane	GO:0004605//phosphatidate cytidylyltransferase activity	GO:0016024//CDP-diacylglycerol biosynthetic process	K00981//phosphatidate cytidylyltransferase [EC:2.7.7.41]	NA	-1.102	gene
104891743	mitochondrial pyruvate carrier 2-like	GO:0005743//mitochondrial inner membrane;GO:0031305//integral component of mitochondrial inner membrane	GO:0050833//pyruvate transmembrane transporter activity	GO:0006850//mitochondrial pyruvate transmembrane transport	K22139//mitochondrial pyruvate carrier 2	NA	-1.485	gene
104891741	chlorophyll a-b binding protein 4, chloroplastic	GO:0009535//chloroplast thylakoid membrane;GO:0009523//photosystem II;GO:0016021//integral component of membrane;GO:0009522//photosystem I	GO:0016168//chlorophyll binding	GO:0009765//photosynthesis, light harvesting;GO:0018298//protein-chromophore linkage	K08911	NA	-2.328	gene
104891736	EH domain-containing protein 1-like	GO:0016020//membrane;GO:0043231//intracellular membrane-bounded organelle;GO:0005768//endosome;GO:0009506//plasmodesma	GO:0005509//calcium ion binding;GO:0005525//GTP binding	GO:0006897//endocytosis;GO:0051260//protein homooligomerization;GO:0042538//hyperosmotic salinity response;GO:0032456//endocytic recycling	K12483//EH domain-containing protein 1	1.114	NA	promoter
104891706	aspartate carbamoyltransferase 1, chloroplastic	#N/A	GO:0016597//amino acid binding;GO:0004070//aspartate carbamoyltransferase activity	GO:0006520//cellular amino acid metabolic process;GO:0006207//'de novo' pyrimidine nucleobase biosynthetic process	K00609	20.283	-0.278	both
104891701	condensin complex subunit 2-like	GO:0000796//condensin complex	NA	GO:0051301//cell division;GO:0007076//mitotic chromosome condensation	K06676//condensin complex subunit 2	NA	1.161	gene
104891696	1,4-alpha-glucan-branching enzyme 3, chloroplastic/amyloplastic	GO:0005737//cytoplasm;GO:0009507//chloroplast	GO:0004553//hydrolase activity, hydrolyzing O-glycosyl compounds;GO:0043169//cation binding;GO:0003844//1,4-alpha-glucan branching enzyme activity	GO:0005978//glycogen biosynthetic process;GO:0009791//post-embryonic development;GO:0005975//carbohydrate metabolic process	K00700//1,4-alpha-glucan branching enzyme [EC:2.4.1.18]	-1.141	NA	promoter
104891693	probable beta-1,3-galactosyltransferase 2	GO:0016021//integral component of membrane;GO:0000139//Golgi membrane	GO:0016757//transferase activity, transferring glycosyl groups	GO:0006486//protein glycosylation	K20855	NA	19.62	gene
104891688	28 kDa ribonucleoprotein, chloroplastic	#N/A	GO:0003723//RNA binding	NA	K13201//nucleolysin TIA-1/TIAR;K13126//polyadenylate-binding protein	NA	-1.198	gene
104891646	probable folate-biopterin transporter 4	GO:0016021//integral component of membrane	NA	NA	NA	1.023	NA	promoter
104891617	lanC-like protein GCR2	NA	GO:0003824//catalytic activity	NA	NA	NA	-4.813	gene
104891609	2-succinylbenzoate--CoA ligase, chloroplastic/peroxisomal	#N/A	GO:0003824//catalytic activity	NA	K14760	NA	2.371	gene
104891597	NAC transcription factor 25	GO:0005634//nucleus	GO:0003677//DNA binding	GO:0006355//regulation of transcription, DNA-templated	K05941//glutathione gamma-glutamylcysteinyltransferase [EC:2.3.2.15];K00521;K20241//WD repeat-containing protein 44	1.492	NA	promoter
104891590	probable disease resistance protein At4g14610	NA	GO:0043531//ADP binding	NA	K13459	NA	-3.357	gene
104891584	receptor-like protein kinase THESEUS 1	GO:0016021//integral component of membrane	GO:0005524//ATP binding;GO:0004672//protein kinase activity	NA	K04733//interleukin-1 receptor-associated kinase 4 [EC:2.7.11.1]	1.247	NA	promoter
104891582	lysine-specific histone demethylase 1 homolog 2	GO:0016021//integral component of membrane	GO:0003677//DNA binding;GO:0008168//methyltransferase activity;GO:0016491//oxidoreductase activity	GO:0032259//methylation	K11450//lysine-specific histone demethylase 1A [EC:1.-.-.-]	1.514	NA	promoter
104891573	lysosomal Pro-X carboxypeptidase-like	GO:0016021//integral component of membrane	GO:0008236//serine-type peptidase activity	NA	K01285//lysosomal Pro-X carboxypeptidase [EC:3.4.16.2]	NA	2.11	gene
104891570	ferredoxin--nitrite reductase, chloroplastic	NA	GO:0020037//heme binding;GO:0051536//iron-sulfur cluster binding;GO:0016491//oxidoreductase activity	NA	K00366	NA	1.287	gene
104891567	non-canonical poly(A) RNA polymerase PAPD5	#N/A	GO:0016779//nucleotidyltransferase activity;GO:0070566//adenylyltransferase activity	GO:0006364//rRNA processing	K03514//non-canonical poly(A) RNA polymerase PAPD5/7 [EC:2.7.7.19]	NA	-1.013	gene
104891496	squamosa promoter-binding-like protein 4	GO:0005634//nucleus	GO:0046872//metal ion binding;GO:0003677//DNA binding	NA	K20641//Rho GTPase-activating protein 20;K13415	21.506	21.506	both
104891475	tryptophan aminotransferase-related protein 3-like	GO:0016021//integral component of membrane	GO:0016846//carbon-sulfur lyase activity	NA	K14548//U3 small nucleolar RNA-associated protein 4;K16903	NA	2.862	gene
104891466	UDP-glycosyltransferase 79B6-like	NA	GO:0016758//transferase activity, transferring hexosyl groups	NA	K17193	NA	4.535	gene
104891451	reticulon-4-interacting protein 1, mitochondrial	#N/A	GO:0016491//oxidoreductase activity	NA	K18980	NA	-3.253	gene
104891447	RNA exonuclease 4	#N/A	GO:0008408//3'-5' exonuclease activity;GO:0003676//nucleic acid binding	GO:0006364//rRNA processing	K18327//RNA exonuclease 4 [EC:3.1.-.-]	-1.321	NA	promoter
104891399	phosphoenolpyruvate carboxylase 2	GO:0048046//apoplast;GO:0005829//cytosol;GO:0005737//cytoplasm;GO:0009507//chloroplast	GO:0008964//phosphoenolpyruvate carboxylase activity	GO:0006099//tricarboxylic acid cycle;GO:0015977//carbon fixation;GO:0048366//leaf development;GO:0015979//photosynthesis	K01595//phosphoenolpyruvate carboxylase [EC:4.1.1.31]	-0.112	-2.256	both
104891370	origin recognition complex subunit 3-like	GO:0005664//nuclear origin of replication recognition complex	GO:0003677//DNA binding	GO:0006260//DNA replication	K02605//origin recognition complex subunit 3	1.165	NA	promoter
104891338	protein transport protein Sec61 subunit alpha-like	GO:0005783//endoplasmic reticulum;GO:0005784//Sec61 translocon complex;GO:0016021//integral component of membrane;GO:0005789//endoplasmic reticulum membrane	GO:0005048//signal sequence binding;GO:0043022//ribosome binding;GO:0008320//protein transmembrane transporter activity	GO:0006616//SRP-dependent cotranslational protein targeting to membrane, translocation;GO:0031204//posttranslational protein targeting to membrane, translocation;GO:0015031//protein transport	K10956//protein transport protein SEC61 subunit alpha	NA	3.064	gene
104891333	homocysteine S-methyltransferase 1-like	NA	GO:0008270//zinc ion binding;GO:0047150//betaine-homocysteine S-methyltransferase activity	GO:0032259//methylation;GO:0009086//methionine biosynthetic process	K00547//homocysteine S-methyltransferase [EC:2.1.1.10]	1.526	1.526	both
104891323	Werner syndrome ATP-dependent helicase homolog	GO:0005634//nucleus	GO:0005524//ATP binding;GO:0043138//3'-5' DNA helicase activity;GO:0003676//nucleic acid binding	GO:0006281//DNA repair;GO:0006260//DNA replication;GO:0006310//DNA recombination	K03654//ATP-dependent DNA helicase RecQ [EC:3.6.4.12]	NA	1.172	gene
104891322	NAD(P)H-quinone oxidoreductase subunit N, organellar chromatophore	GO:0016020//membrane	GO:0016655//oxidoreductase activity, acting on NAD(P)H, quinone or similar compound as acceptor	NA	NA	NA	-1.485	gene
104891314	probable LRR receptor-like serine/threonine-protein kinase At1g53430	GO:0016021//integral component of membrane	GO:0005524//ATP binding;GO:0004672//protein kinase activity	NA	K04733//interleukin-1 receptor-associated kinase 4 [EC:2.7.11.1];K13420	NA	-1.597	gene
104891306	50S ribosomal protein L13, chloroplastic	GO:0005840//ribosome;GO:0009507//chloroplast	GO:0003735//structural constituent of ribosome	GO:0006412//translation	K02871//large subunit ribosomal protein L13	NA	1.605	gene
104891294	alpha,alpha-trehalose-phosphate synthase [UDP-forming] 1	#N/A	GO:0003825//alpha,alpha-trehalose-phosphate synthase (UDP-forming) activity	GO:0005992//trehalose biosynthetic process	K16055//trehalose 6-phosphate synthase/phosphatase [EC:2.4.1.15 3.1.3.12]	NA	-1.493	gene
104891293	trifunctional UDP-glucose 4,6-dehydratase/UDP-4-keto-6-deoxy-D-glucose 3,5-epimerase/UDP-4-keto-L-rhamnose-reductase RHM1-like	#N/A	GO:0008460//dTDP-glucose 4,6-dehydratase activity	GO:0009225//nucleotide-sugar metabolic process	K12450//UDP-glucose 4,6-dehydratase [EC:4.2.1.76]	1.055	NA	promoter
104891267	protein REVEILLE 2	GO:0005634//nucleus	GO:0003677//DNA binding	NA	K12133//MYB-related transcription factor LHY	NA	-1.095	gene
104891261	pentatricopeptide repeat-containing protein At4g15720	GO:0016021//integral component of membrane	GO:0008270//zinc ion binding	NA	K22733//magnesium transporter	NA	2.331	gene
104891253	zinc finger CCHC domain-containing protein 10	#N/A	GO:0008270//zinc ion binding;GO:0003676//nucleic acid binding	NA	K09566//peptidyl-prolyl isomerase G (cyclophilin G) [EC:5.2.1.8]	NA	-2.599	gene
104891226	basic endochitinase	#N/A	GO:0008061//chitin binding;GO:0004568//chitinase activity	GO:0006032//chitin catabolic process;GO:0016998//cell wall macromolecule catabolic process;GO:0005975//carbohydrate metabolic process	K20547//basic endochitinase B [EC:3.2.1.14]	-2.454	0.006	both
104891201	proteasome assembly chaperone 4	#N/A	NA	GO:0043248//proteasome assembly	K11878//proteasome assembly chaperone 4	NA	-2.34	gene
104891187	peroxygenase	GO:0016021//integral component of membrane	GO:0005509//calcium ion binding	NA	K17991	NA	4.841	gene
104891154	EGF domain-specific O-linked N-acetylglucosamine transferase-like	GO:0016021//integral component of membrane	GO:0016757//transferase activity, transferring glycosyl groups	NA	K18134//EGF domain-specific O-GlcNAc transferase [EC:2.4.1.255];K18207//protein O-mannose beta-1,4-N-acetylglucosaminyltransferase [EC:2.4.1.312]	NA	3.338	gene
104891140	protein PALE CRESS, chloroplastic	GO:0009507//chloroplast	NA	GO:0010239//chloroplast mRNA processing;GO:0009658//chloroplast organization;GO:0048366//leaf development	NA	1.976	NA	promoter
104891129	mechanosensitive ion channel protein 10-like	GO:0016021//integral component of membrane;GO:0005886//plasma membrane	NA	GO:0055085//transmembrane transport	K22048	NA	1.626	gene
104891126	multisubstrate pseudouridine synthase 7	#N/A	GO:0003723//RNA binding;GO:0009982//pseudouridine synthase activity	GO:0001522//pseudouridine synthesis	K06176//tRNA pseudouridine13 synthase [EC:5.4.99.27]	NA	3.181	gene
104891119	argininosuccinate lyase, chloroplastic	#N/A	GO:0004056//argininosuccinate lyase activity	GO:0042450//arginine biosynthetic process via ornithine	K01755//argininosuccinate lyase [EC:4.3.2.1]	NA	-3.04	gene
104891110	poly(rC)-binding protein 1	GO:0005634//nucleus;GO:0005737//cytoplasm	GO:0003723//RNA binding	GO:0009911//positive regulation of flower development	K21444//poly(rC)-binding protein 3/4	NA	1.131	gene
104891104	inositol phosphorylceramide glucuronosyltransferase 1	GO:0005768//endosome;GO:0016021//integral component of membrane;GO:0005802//trans-Golgi network	GO:0016757//transferase activity, transferring glycosyl groups;GO:1990482//sphingolipid alpha-glucuronosyltransferase activity;GO:0015020//glucuronosyltransferase activity	GO:0046513//ceramide biosynthetic process	K22809//inositol phosphorylceramide glucuronosyltransferase 1 [EC:2.4.1.-]	-1.814	NA	promoter
104891102	phosphoenolpyruvate carboxylase kinase 2-like	#N/A	GO:0004674//protein serine/threonine kinase activity;GO:0005524//ATP binding	NA	K04515//calcium/calmodulin-dependent protein kinase (CaM kinase) II [EC:2.7.11.17]	20.33	NA	promoter
104891090	cation transport regulator-like protein 2	NA	GO:0003839//gamma-glutamylcyclotransferase activity;GO:0016740//transferase activity	GO:0006751//glutathione catabolic process	K22596//gamma-glutamylcyclotransferase, plant [EC:4.3.2.9]	NA	-2.498	gene
104891087	probable carboxylesterase 1	GO:0016021//integral component of membrane	GO:0016787//hydrolase activity	NA	K17872;K20506	1.022	NA	promoter
104891062	zinc finger BED domain-containing protein RICESLEEPER 2-like	NA	GO:0003677//DNA binding;GO:0005524//ATP binding;GO:0004672//protein kinase activity;GO:0046983//protein dimerization activity	NA	K10398//kinesin family member 11;K19984//exocyst complex component 5	NA	1.413	gene
104891044	kinesin-like protein NACK1	#N/A	GO:0005524//ATP binding;GO:0003777//microtubule motor activity;GO:0008017//microtubule binding	GO:0007018//microtubule-based movement	K11498//centromeric protein E	NA	3.25	gene
104891041	sugar transporter ERD6-like 5	GO:0016021//integral component of membrane	GO:0022857//transmembrane transporter activity	NA	K08145//MFS transporter, SP family, solute carrier family 2 (facilitated glucose transporter), member 8	NA	-18.202	gene
104891026	aldehyde dehydrogenase family 3 member H1	NA	GO:0016620//oxidoreductase activity, acting on the aldehyde or oxo group of donors, NAD or NADP as acceptor	GO:0006081//cellular aldehyde metabolic process	K00128//aldehyde dehydrogenase (NAD+) [EC:1.2.1.3]	NA	2.159	gene
104891010	50S ribosomal protein L20, chloroplastic-like	GO:0005840//ribosome	GO:0003735//structural constituent of ribosome;GO:0019843//rRNA binding	GO:0006412//translation	K02887//large subunit ribosomal protein L20	NA	3.042	gene
104891004	protein HASTY 1	GO:0005634//nucleus	NA	GO:0051168//nuclear export	K14289//exportin-5	NA	3.771	gene
104891003	probable serine/threonine-protein kinase At1g54610	#N/A	GO:0005524//ATP binding;GO:0004672//protein kinase activity	NA	K08819//cyclin-dependent kinase 12/13 [EC:2.7.11.22 2.7.11.23]	4.053	NA	promoter
104890991	acyltransferase-like protein At1g54570, chloroplastic	#N/A	GO:0016747//transferase activity, transferring acyl groups other than amino-acyl groups	NA	NA	NA	2.494	gene
104890963	mediator-associated protein 1	#N/A	NA	GO:0006355//regulation of transcription, DNA-templated	K11294//nucleolin	-1.131	NA	promoter
104890952	IAA-amino acid hydrolase ILR1-like 6	#N/A	GO:0016787//hydrolase activity	NA	K14664;K21604//jasmonoyl-L-amino acid hydrolase [EC:3.5.1.127]	NA	-3.368	gene
104890939	serine/threonine-protein phosphatase 6 regulatory ankyrin repeat subunit A-like	GO:0016021//integral component of membrane	NA	NA	K15503//serine/threonine-protein phosphatase 6 regulatory ankyrin repeat subunit B;K15502//serine/threonine-protein phosphatase 6 regulatory ankyrin repeat subunit A	NA	2.315	gene
104890937	mediator of RNA polymerase II transcription subunit 14	GO:0016592//mediator complex	GO:0003712//transcription coregulator activity	GO:0006357//regulation of transcription by RNA polymerase II	K15156//mediator of RNA polymerase II transcription subunit 14	NA	2.87	gene
104890935	auxin-responsive protein IAA4-like	GO:0005634//nucleus	NA	GO:0006355//regulation of transcription, DNA-templated;GO:0009734//auxin-activated signaling pathway	K14484//auxin-responsive protein IAA	-1.355	NA	promoter
104890934	auxin-induced protein AUX28	GO:0005634//nucleus	NA	GO:0006355//regulation of transcription, DNA-templated;GO:0009734//auxin-activated signaling pathway	K14484//auxin-responsive protein IAA	-1.391	NA	promoter
104890933	pathogenesis-related protein PR-4	#N/A	NA	GO:0050832//defense response to fungus;GO:0042742//defense response to bacterium	NA	-2.482	-0.985	both
104890930	probable prefoldin subunit 4	GO:0016272//prefoldin complex	GO:0051082//unfolded protein binding	GO:0006457//protein folding	K09550//prefoldin subunit 4	NA	3.034	gene
104890927	GDSL esterase/lipase At1g29670-like	GO:0016021//integral component of membrane	GO:0004386//helicase activity;GO:0003676//nucleic acid binding	NA	K13412//calcium-dependent protein kinase [EC:2.7.11.1];K01674//carbonic anhydrase [EC:4.2.1.1]	NA	2.337	gene
104890925	zinc finger CCCH domain-containing protein 67-like	NA	GO:0046872//metal ion binding	NA	K13832;K23048//RING finger protein unkempt	-0.554	-4.416	both
104890911	light-inducible protein CPRF2	#N/A	GO:0003700//DNA-binding transcription factor activity	NA	K09060;K04450//cyclic AMP-dependent transcription factor ATF-2	NA	3.154	gene
104890906	putative calcium-transporting ATPase 13, plasma membrane-type	GO:0016021//integral component of membrane	GO:0005524//ATP binding;GO:0005388//calcium transmembrane transporter activity, phosphorylative mechanism	NA	K01537//Ca2+-transporting ATPase [EC:3.6.3.8]	NA	-2.486	gene
104890863	nuclear transcription factor Y subunit C-3-like	GO:0005634//nucleus	GO:0046982//protein heterodimerization activity	NA	K08066//nuclear transcription factor Y, gamma	-1.53	NA	promoter
104890853	mevalonate kinase	GO:0005737//cytoplasm	GO:0005524//ATP binding;GO:0004496//mevalonate kinase activity	GO:0016126//sterol biosynthetic process;GO:0019287//isopentenyl diphosphate biosynthetic process, mevalonate pathway	K00869//mevalonate kinase [EC:2.7.1.36]	-1.055	NA	promoter
104890849	protein YIPF1 homolog	GO:0005794//Golgi apparatus;GO:0016021//integral component of membrane	NA	GO:0016192//vesicle-mediated transport	K22940//protein YIPF1/2	NA	-1.012	gene
104890847	cyclin-P3-1	#N/A	GO:0019901//protein kinase binding	GO:0000079//regulation of cyclin-dependent protein serine/threonine kinase activity	K01255//leucyl aminopeptidase [EC:3.4.11.1]	3.767	20.69	both
104890831	probable linoleate 9S-lipoxygenase 5	#N/A	GO:0016702//oxidoreductase activity, acting on single donors with incorporation of molecular oxygen, incorporation of two atoms of oxygen;GO:0046872//metal ion binding	GO:0031408//oxylipin biosynthetic process	K15718//linoleate 9S-lipoxygenase [EC:1.13.11.58]	-1.626	-1.626	both
104890825	protein ALWAYS EARLY 2-like	GO:0017053//transcription repressor complex	GO:0003677//DNA binding	GO:0006351//transcription, DNA-templated	K21773//protein lin-9	NA	-4.428	gene
104890813	40S ribosomal protein S15a-2-like	GO:0005840//ribosome	GO:0003735//structural constituent of ribosome	GO:0006412//translation	K02957//small subunit ribosomal protein S15Ae	2.052	NA	promoter
104890810	cyclin-H1-1	GO:0042025//host cell nucleus	GO:0016538//cyclin-dependent protein serine/threonine kinase regulator activity	GO:0006357//regulation of transcription by RNA polymerase II	K06634//cyclin H	-1.022	NA	promoter
104890791	putative wall-associated receptor kinase-like 11	GO:0016021//integral component of membrane	GO:0005524//ATP binding;GO:0004672//protein kinase activity;GO:0030247//polysaccharide binding	NA	K04733//interleukin-1 receptor-associated kinase 4 [EC:2.7.11.1]	NA	-2.299	gene
104890778	vesicle-associated membrane protein 722	GO:0016021//integral component of membrane	NA	GO:0016192//vesicle-mediated transport	K08511//vesicle-associated membrane protein 72	1.523	NA	promoter
104890763	probable rRNA-processing protein EBP2 homolog	GO:0005730//nucleolus;GO:0034399//nuclear periphery;GO:0030687//preribosome, large subunit precursor	NA	GO:0006364//rRNA processing;GO:0042273//ribosomal large subunit biogenesis	K14823//rRNA-processing protein EBP2	1.769	NA	promoter
104890751	probable pectinesterase 29	GO:0005618//cell wall;GO:0005576//extracellular region	GO:0045330//aspartyl esterase activity;GO:0052689//carboxylic ester hydrolase activity;GO:0030599//pectinesterase activity	GO:0045490//pectin catabolic process;GO:0042545//cell wall modification	K01051//pectinesterase [EC:3.1.1.11]	3.618	NA	promoter
104890749	NHL repeat-containing protein 2	#N/A	GO:0016787//hydrolase activity	GO:0045454//cell redox homeostasis	K20884	NA	4.007	gene
104890743	transmembrane emp24 domain-containing protein p24delta3-like	GO:0016021//integral component of membrane;GO:0005789//endoplasmic reticulum membrane	NA	NA	K20352//p24 family protein delta-1	NA	1.093	gene
104890715	nuclear transcription factor Y subunit B-3	GO:0005634//nucleus	GO:0043565//sequence-specific DNA binding;GO:0046982//protein heterodimerization activity	GO:0006355//regulation of transcription, DNA-templated;GO:0045893//positive regulation of transcription, DNA-templated	K08065//nuclear transcription Y subunit beta	NA	2.514	gene
104890678	AP-3 complex subunit mu	GO:0030131//clathrin adaptor complex	NA	GO:0006886//intracellular protein transport;GO:0016192//vesicle-mediated transport	K12398//AP-3 complex subunit mu	NA	-3.554	gene
104890677	Golgi apparatus membrane protein-like protein ECHIDNA	GO:0016021//integral component of membrane;GO:0000139//Golgi membrane	NA	NA	NA	NA	1.976	gene
104890675	galactinol synthase 2-like	#N/A	GO:0047216//inositol 3-alpha-galactosyltransferase activity	GO:0006012//galactose metabolic process	K18819//inositol 3-alpha-galactosyltransferase [EC:2.4.1.123]	-2.542	NA	promoter
104890670	ABC transporter I family member 20	#N/A	GO:0005524//ATP binding;GO:0016887//ATPase activity	NA	K12608//CCR4-NOT complex subunit CAF16	NA	1.144	gene
104890655	putative RNA polymerase II subunit B1 CTD phosphatase RPAP2 homolog	NA	GO:0043175//RNA polymerase core enzyme binding;GO:0008420//RNA polymerase II CTD heptapeptide repeat phosphatase activity	GO:0070940//dephosphorylation of RNA polymerase II C-terminal domain	K20827//RNA polymerase II-associated protein 2 [EC:3.1.3.16]	NA	4.949	gene
104890654	FACT complex subunit SPT16	GO:0035101//FACT complex	GO:0031491//nucleosome binding;GO:0042393//histone binding	GO:0006368//transcription elongation from RNA polymerase II promoter;GO:0032968//positive regulation of transcription elongation from RNA polymerase II promoter;GO:0034724//DNA replication-independent nucleosome organization	K20093//DNA excision repair protein ERCC-6-like [EC:3.6.4.12];K11323//histone arginine demethylase JMJD6 [EC:1.14.11.-]	1.294	1.294	both
104890630	putative L-cysteine desulfhydrase 1	NA	GO:0045439//isopenicillin-N epimerase activity;GO:0003824//catalytic activity	NA	K22207//L-cysteine desulfhydrase [EC:4.4.1.28]	NA	1.413	gene
104890608	meiotic recombination protein DMC1 homolog	GO:0005634//nucleus	GO:0000150//recombinase activity;GO:0003677//DNA binding;GO:0005524//ATP binding;GO:0008094//DNA-dependent ATPase activity	GO:0007131//reciprocal meiotic recombination;GO:0006281//DNA repair;GO:0051026//chiasma assembly	K10872//meiotic recombination protein DMC1	NA	20.192	gene
104890600	phosphatidylinositol 4-kinase beta 1-like	NA	GO:0016301//kinase activity	GO:0048015//phosphatidylinositol-mediated signaling;GO:0046854//phosphatidylinositol phosphorylation	K19801//phosphatidylinositol 4-kinase B [EC:2.7.1.67]	NA	1.431	gene
104890592	glycosylphosphatidylinositol anchor biosynthesis protein 11	GO:0016021//integral component of membrane;GO:0005789//endoplasmic reticulum membrane	NA	GO:0006506//GPI anchor biosynthetic process	K05287//phosphatidylinositol glycan, class F [EC:2.7.-.-]	NA	2.876	gene
104890589	putative methyltransferase DDB_G0268948	#N/A	GO:0008168//methyltransferase activity	GO:0032259//methylation	K08869//aarF domain-containing kinase	1.523	NA	promoter
104890571	small heat shock protein, chloroplastic-like	#N/A	GO:0016740//transferase activity	NA	K13993	NA	3.66	gene
104890552	diacylglycerol kinase 2	GO:0016021//integral component of membrane	GO:0004143//diacylglycerol kinase activity;GO:0003951//NAD+ kinase activity;GO:0005524//ATP binding	GO:0007205//protein kinase C-activating G protein-coupled receptor signaling pathway;GO:0035556//intracellular signal transduction	K00901//diacylglycerol kinase (ATP) [EC:2.7.1.107]	NA	-4.384	gene
104890533	myb-like protein A	GO:0016021//integral component of membrane;GO:0005777//peroxisome	NA	GO:0010468//regulation of gene expression	K14692//solute carrier family 30 (zinc transporter), member 5/7;K01534//Cd2+/Zn2+-exporting ATPase [EC:3.6.3.3 3.6.3.5]	NA	1.116	gene
104890526	probable fructose-bisphosphate aldolase 3, chloroplastic	#N/A	GO:0004332//fructose-bisphosphate aldolase activity	GO:0006096//glycolytic process	K01623//fructose-bisphosphate aldolase, class I [EC:4.1.2.13]	-1.646	NA	promoter
104890518	thioredoxin domain-containing protein PLP3B-like	#N/A	NA	GO:0045454//cell redox homeostasis	NA	-2.763	NA	promoter
104890515	T-complex protein 1 subunit gamma	GO:0005737//cytoplasm;GO:0005832//chaperonin-containing T-complex	GO:0005524//ATP binding;GO:0051082//unfolded protein binding	GO:0006457//protein folding	K09495//T-complex protein 1 subunit gamma	NA	3.073	gene
104890511	28S ribosomal protein S33, mitochondrial	NA	GO:0016757//transferase activity, transferring glycosyl groups	NA	K17411//small subunit ribosomal protein S33	NA	-2.208	gene
104890508	CCR4-NOT transcription complex subunit 11	GO:0030014//CCR4-NOT complex	NA	NA	NA	NA	-1.551	gene
104890477	7-deoxyloganetic acid glucosyltransferase-like	NA	GO:0016758//transferase activity, transferring hexosyl groups	NA	K22706;K13493//cytokinin-N-glucosyltransferase [EC:2.4.1.-];K00699//glucuronosyltransferase [EC:2.4.1.17]	-1.779	-1.779	both
104890474	7-deoxyloganetic acid glucosyltransferase-like	NA	GO:0016758//transferase activity, transferring hexosyl groups	NA	K22706;K13493//cytokinin-N-glucosyltransferase [EC:2.4.1.-];K00699//glucuronosyltransferase [EC:2.4.1.17]	NA	-1.171	gene
104890471	7-deoxyloganetic acid glucosyltransferase-like	NA	GO:0016758//transferase activity, transferring hexosyl groups	NA	K13493//cytokinin-N-glucosyltransferase [EC:2.4.1.-]	NA	-1.081	gene
104890469	protein SUPPRESSOR OF GENE SILENCING 3	#N/A	NA	GO:0031047//gene silencing by RNA	K03283//heat shock 70kDa protein 1/2/6/8	NA	4.393	gene
104890468	cleft lip and palate transmembrane protein 1 homolog	GO:0016021//integral component of membrane	NA	NA	K00232//acyl-CoA oxidase [EC:1.3.3.6];K18643//katanin p80 WD40 repeat-containing subunit B1	2.098	NA	promoter
104890446	translational activator GCN1	#N/A	GO:0043022//ribosome binding;GO:0019887//protein kinase regulator activity;GO:0019901//protein kinase binding	GO:0033674//positive regulation of kinase activity;GO:0006417//regulation of translation	K03235	NA	21.567	gene
104890427	transcription initiation factor TFIID subunit 12b	GO:0000124//SAGA complex;GO:0046695//SLIK (SAGA-like) complex;GO:0005669//transcription factor TFIID complex	GO:0046982//protein heterodimerization activity	GO:0006352//DNA-templated transcription, initiation	K03126//transcription initiation factor TFIID subunit 12	4.444	NA	promoter
104890413	tryptophan--tRNA ligase, cytoplasmic	GO:0005737//cytoplasm	GO:0004830//tryptophan-tRNA ligase activity;GO:0005524//ATP binding	GO:0006436//tryptophanyl-tRNA aminoacylation	K01867//tryptophanyl-tRNA synthetase [EC:6.1.1.2]	-3.265	-3.412	both
104890390	ATP-dependent DNA helicase Q-like 1	GO:0005634//nucleus	GO:0005524//ATP binding;GO:0003678//DNA helicase activity;GO:0003676//nucleic acid binding	GO:0006310//DNA recombination	K10901//bloom syndrome protein [EC:3.6.4.12]	NA	6.213	gene
104890386	ABC transporter F family member 5-like	#N/A	GO:0005524//ATP binding;GO:0016887//ATPase activity	NA	K06185//ATP-binding cassette, subfamily F, member 2	-2.155	NA	promoter
104890383	syntaxin-41-like	GO:0016021//integral component of membrane	GO:0005484//SNAP receptor activity	GO:0006886//intracellular protein transport;GO:0016192//vesicle-mediated transport	K08489//syntaxin 16	NA	1.082	gene
104890381	GATA transcription factor 17	#N/A	GO:0008270//zinc ion binding;GO:0043565//sequence-specific DNA binding	GO:0006355//regulation of transcription, DNA-templated	K21630//GATA-type zinc finger protein 1	-1.612	NA	promoter
104890374	probable pectinesterase/pectinesterase inhibitor 20	#N/A	GO:0045330//aspartyl esterase activity;GO:0030599//pectinesterase activity	GO:0045490//pectin catabolic process;GO:0042545//cell wall modification	K01051//pectinesterase [EC:3.1.1.11]	NA	4.506	gene
104890346	probable protein phosphatase 2C 34	NA	GO:0004722//protein serine/threonine phosphatase activity	NA	K17500//integrin-linked kinase-associated serine/threonine phosphatase 2C [EC:3.1.3.16];K17505//protein phosphatase 1K [EC:3.1.3.16];K17506//protein phosphatase 1L [EC:3.1.3.16]	NA	1.394	gene
104890341	60S ribosomal protein L19-3-like	GO:0022625//cytosolic large ribosomal subunit	GO:0003723//RNA binding;GO:0003735//structural constituent of ribosome	GO:0006412//translation	K02885//large subunit ribosomal protein L19e	NA	-2.095	gene
104890332	bifunctional epoxide hydrolase 2-like	GO:0005829//cytosol	GO:0016787//hydrolase activity;GO:0004301//epoxide hydrolase activity;GO:0003824//catalytic activity	GO:0010143//cutin biosynthetic process	K08726//soluble epoxide hydrolase / lipid-phosphate phosphatase [EC:3.3.2.10 3.1.3.76];K01079//phosphoserine phosphatase [EC:3.1.3.3]	1.182	NA	promoter
104890325	UDP-glycosyltransferase 79B6-like	NA	GO:0016758//transferase activity, transferring hexosyl groups	NA	K17193	NA	4.355	gene
104890321	serine/arginine-rich splicing factor SR30	NA	GO:0003723//RNA binding	NA	K12890//splicing factor, arginine/serine-rich 1	NA	-1.004	gene
104890318	translationally-controlled tumor protein homolog	GO:0005737//cytoplasm	GO:0005509//calcium ion binding	GO:0032502//developmental process;GO:0042127//regulation of cell population proliferation	K00128//aldehyde dehydrogenase (NAD+) [EC:1.2.1.3]	2.243	NA	promoter
104890317	26S protease regulatory subunit 6A homolog	GO:0005737//cytoplasm	GO:0016787//hydrolase activity;GO:0005524//ATP binding	GO:0030163//protein catabolic process	K03065//26S proteasome regulatory subunit T5	NA	1.883	gene
104890316	heparan-alpha-glucosaminide N-acetyltransferase	GO:0016021//integral component of membrane	NA	NA	K10532//heparan-alpha-glucosaminide N-acetyltransferase [EC:2.3.1.78]	1.307	1.307	both
104890310	cell cycle checkpoint control protein RAD9A	GO:0030896//checkpoint clamp complex	NA	GO:0006281//DNA repair;GO:0000077//DNA damage checkpoint;GO:0006282//regulation of DNA repair	K10994//cell cycle checkpoint control protein RAD9A [EC:3.1.11.2]	NA	1.158	gene
104890306	respiratory burst oxidase homolog protein B	GO:0016021//integral component of membrane	GO:0016174//NAD(P)H oxidase (H(2)O(2)-forming activity;GO:0050664//oxidoreductase activity, acting on NAD(P)H, oxygen as acceptor;GO:0004601//peroxidase activity;GO:0005509//calcium ion binding	GO:0009845//seed germination;GO:0009408//response to heat	K13447//respiratory burst oxidase [EC:1.6.3.- 1.11.1.-]	NA	1.31	gene
104890298	putative protease Do-like 14	#N/A	GO:0004252//serine-type endopeptidase activity	NA	K08669//HtrA serine peptidase 2 [EC:3.4.21.108]	NA	1.24	gene
104890296	wall-associated receptor kinase-like 1	GO:0016021//integral component of membrane	GO:0005524//ATP binding;GO:0004672//protein kinase activity;GO:0030247//polysaccharide binding;GO:0005509//calcium ion binding	NA	K04733//interleukin-1 receptor-associated kinase 4 [EC:2.7.11.1]	1.542	NA	promoter
104890290	wall-associated receptor kinase-like 8	NA	GO:0005524//ATP binding;GO:0004672//protein kinase activity	NA	K04733//interleukin-1 receptor-associated kinase 4 [EC:2.7.11.1]	NA	-1.969	gene
104890276	putative DNA-binding protein ESCAROLA	GO:0005634//nucleus	GO:0003680//AT DNA binding;GO:0003700//DNA-binding transcription factor activity	NA	NA	NA	-1.159	gene
104890250	putative wall-associated receptor kinase-like 16	NA	GO:0005524//ATP binding;GO:0004672//protein kinase activity	NA	K04733//interleukin-1 receptor-associated kinase 4 [EC:2.7.11.1]	NA	-1.078	gene
104890239	alkaline/neutral invertase CINV2-like	NA	GO:0033926//glycopeptide alpha-N-acetylgalactosaminidase activity	NA	K02986	NA	1.578	gene
104890228	probable WRKY transcription factor 2	GO:0005634//nucleus	GO:0043565//sequence-specific DNA binding;GO:0003700//DNA-binding transcription factor activity	NA	K18835	NA	18.985	gene
104890225	photosystem I reaction center subunit XI, chloroplastic	GO:0009535//chloroplast thylakoid membrane;GO:0009538//photosystem I reaction center;GO:0016021//integral component of membrane	NA	GO:0015979//photosynthesis	K02699	NA	1.604	gene
104890200	putative RNA-binding protein Luc7-like 2	GO:0005685//U1 snRNP	GO:0003729//mRNA binding	GO:0006376//mRNA splice site selection	K11093//U1 small nuclear ribonucleoprotein 70kDa	NA	3.217	gene
104890195	dehydrogenase/reductase SDR family member 7	GO:0016021//integral component of membrane	GO:0016491//oxidoreductase activity	NA	K11165//dehydrogenase/reductase SDR family member 7 [EC:1.1.-.-]	NA	6.373	gene
104890169	LETM1 and EF-hand domain-containing protein 1, mitochondrial	GO:0016021//integral component of membrane;GO:0005739//mitochondrion	GO:0043022//ribosome binding;GO:0005509//calcium ion binding	NA	K17800//LETM1 and EF-hand domain-containing protein 1, mitochondrial	2.231	NA	promoter
104890160	beta-hexosaminidase 3	NA	GO:0102148//N-acetyl-beta-D-galactosaminidase activity;GO:0004563//beta-N-acetylhexosaminidase activity	GO:0005975//carbohydrate metabolic process	K12373//hexosaminidase [EC:3.2.1.52]	2.791	NA	promoter
104890149	RINT1-like protein MAG2L	GO:0005783//endoplasmic reticulum	NA	GO:0048193//Golgi vesicle transport	K20474//RAD50-interacting protein 1	NA	5.33	gene
104890140	dr1-associated corepressor	GO:0005634//nucleus	GO:0046982//protein heterodimerization activity	NA	K21752//Dr1-associated corepressor	NA	1.352	gene
104890119	blue copper protein-like	GO:0016021//integral component of membrane	GO:0009055//electron transfer activity	NA	K11886//proteasome component ECM29	-2.966	NA	promoter
104890118	proteasome-associated protein ECM29 homolog	#N/A	GO:0060090//molecular adaptor activity	GO:0043248//proteasome assembly	K11886//proteasome component ECM29	NA	-3.534	gene
104890112	hydroxymethylglutaryl-CoA lyase, mitochondrial	GO:0005739//mitochondrion	GO:0004419//hydroxymethylglutaryl-CoA lyase activity	GO:0046951//ketone body biosynthetic process	K01640//hydroxymethylglutaryl-CoA lyase [EC:4.1.3.4]	NA	5.283	gene
104890100	endoglucanase 8-like	NA	GO:0008810//cellulase activity	GO:0030245//cellulose catabolic process	K01179//endoglucanase [EC:3.2.1.4]	NA	1.465	gene
104890064	DNA ligase 4	NA	GO:0003677//DNA binding;GO:0005524//ATP binding;GO:0003910//DNA ligase (ATP) activity	GO:0071897//DNA biosynthetic process;GO:0006260//DNA replication;GO:0051103//DNA ligation involved in DNA repair;GO:0006310//DNA recombination	K10777//DNA ligase 4 [EC:6.5.1.1]	6.643	-0.085	both
104890056	DET1- and DDB1-associated protein 1	#N/A	NA	GO:0032434//regulation of proteasomal ubiquitin-dependent protein catabolic process	K11792//DET1- and DDB1-associated protein 1	NA	2.233	gene
104890025	ABC transporter G family member 15-like	GO:0016021//integral component of membrane	GO:0005524//ATP binding;GO:0016887//ATPase activity	NA	K05681//ATP-binding cassette, subfamily G (WHITE), member 2;K21396//ATP-binding cassette, subfamily G (WHITE), eye pigment precursor transporter	NA	-1.392	gene
104890023	NAD(H) kinase 1	#N/A	GO:0003951//NAD+ kinase activity	GO:0006741//NADP biosynthetic process;GO:0019674//NAD metabolic process	K00858//NAD+ kinase [EC:2.7.1.23]	NA	2.72	gene
104890018	cytochrome P450 89A2-like	NA	GO:0016705//oxidoreductase activity, acting on paired donors, with incorporation or reduction of molecular oxygen;GO:0020037//heme binding;GO:0005506//iron ion binding;GO:0004497//monooxygenase activity	NA	K07409//cytochrome P450 family 1 subfamily A polypeptide 2 [EC:1.14.14.1];K00512//steroid 17alpha-monooxygenase / 17alpha-hydroxyprogesterone deacetylase [EC:1.14.14.19 1.14.14.32]	-1.308	-1.308	both
104889981	mitochondrial tRNA-specific 2-thiouridylase 1	#N/A	GO:0016783//sulfurtransferase activity	GO:0008033//tRNA processing	K21027//tRNA-5-taurinomethyluridine 2-sulfurtransferase [EC:2.8.1.14]	-3.933	NA	promoter
104889978	RNA-binding protein PNO1-like	#N/A	GO:0003723//RNA binding	NA	K11884//RNA-binding protein PNO1	-0.684	-2.27	both
104889977	aldehyde dehydrogenase family 3 member F1-like	GO:0016021//integral component of membrane	GO:0016620//oxidoreductase activity, acting on the aldehyde or oxo group of donors, NAD or NADP as acceptor	GO:0006081//cellular aldehyde metabolic process	K00128//aldehyde dehydrogenase (NAD+) [EC:1.2.1.3]	NA	2.232	gene
104889976	probable ATP-dependent RNA helicase DHX37	#N/A	GO:0005524//ATP binding;GO:0004386//helicase activity;GO:0003676//nucleic acid binding	NA	K14780//ATP-dependent RNA helicase DHX37/DHR1 [EC:3.6.4.13]	-1.562	-1.237	both
104889975	origin recognition complex subunit 1-like	GO:0005634//nucleus	GO:0046872//metal ion binding;GO:0003677//DNA binding;GO:0005524//ATP binding;GO:0003682//chromatin binding	GO:0006260//DNA replication	K02603//origin recognition complex subunit 1	-1.562	NA	promoter
104889970	extensin-2-like	NA	GO:0005199//structural constituent of cell wall	GO:0009664//plant-type cell wall organization	K10955//mucin-2	NA	5.195	gene
104889951	DNA-damage-repair/toleration protein DRT100-like	#N/A	GO:0032041//NAD-dependent histone deacetylase activity (H3-K14 specific)	NA	K13420	2.623	NA	promoter
104889932	linoleate 13S-lipoxygenase 2-1, chloroplastic-like	NA	GO:0016702//oxidoreductase activity, acting on single donors with incorporation of molecular oxygen, incorporation of two atoms of oxygen;GO:0046872//metal ion binding	GO:0031408//oxylipin biosynthetic process	K00454	NA	1.047	gene
104889926	beta-glucosidase 13-like	NA	GO:0004553//hydrolase activity, hydrolyzing O-glycosyl compounds	GO:0005975//carbohydrate metabolic process	K01188//beta-glucosidase [EC:3.2.1.21]	NA	4.268	gene
104889925	beta-glucosidase 13-like	#N/A	GO:0004553//hydrolase activity, hydrolyzing O-glycosyl compounds	GO:0005975//carbohydrate metabolic process	K01188//beta-glucosidase [EC:3.2.1.21]	2.345	1.14	both
104889924	beta-glucosidase 24-like	NA	GO:0004553//hydrolase activity, hydrolyzing O-glycosyl compounds	GO:0005975//carbohydrate metabolic process	K01188//beta-glucosidase [EC:3.2.1.21]	2.284	NA	promoter
104889921	beta-glucosidase 24-like	NA	GO:0004553//hydrolase activity, hydrolyzing O-glycosyl compounds	GO:0005975//carbohydrate metabolic process	K01188//beta-glucosidase [EC:3.2.1.21]	NA	5.447	gene
104889903	bromodomain-containing protein DDB_G0280777-like	#N/A	GO:0003677//DNA binding	NA	K02934//large subunit ribosomal protein L6e;K09566//peptidyl-prolyl isomerase G (cyclophilin G) [EC:5.2.1.8]	NA	2.829	gene
104889899	protein NRT1/ PTR FAMILY 7.1	GO:0016021//integral component of membrane	GO:0022857//transmembrane transporter activity	NA	K14638//solute carrier family 15 (peptide/histidine transporter), member 3/4	2.211	4.951	both
104889896	callose synthase 3	GO:0016021//integral component of membrane;GO:0000148//1,3-beta-D-glucan synthase complex	GO:0003843//1,3-beta-D-glucan synthase activity	GO:0006075//(1->3)-beta-D-glucan biosynthetic process	K11000//callose synthase [EC:2.4.1.-]	2.975	NA	promoter
104889895	callose synthase 9	GO:0016021//integral component of membrane;GO:0000148//1,3-beta-D-glucan synthase complex	GO:0003843//1,3-beta-D-glucan synthase activity	GO:0006075//(1->3)-beta-D-glucan biosynthetic process	K11000//callose synthase [EC:2.4.1.-]	NA	4.573	gene
104889891	protein trichome birefringence-like	GO:0016021//integral component of membrane	NA	NA	NA	NA	1.396	gene
104889885	DNA (cytosine-5)-methyltransferase CMT3	GO:0005634//nucleus	GO:0003682//chromatin binding;GO:0003886//DNA (cytosine-5-)-methyltransferase activity	NA	K00558//DNA (cytosine-5)-methyltransferase 1 [EC:2.1.1.37]	NA	-1.666	gene
104889871	serine/threonine-protein phosphatase PP2A catalytic subunit	NA	GO:0004721//phosphoprotein phosphatase activity	NA	K04382//serine/threonine-protein phosphatase 2A catalytic subunit [EC:3.1.3.16]	NA	-2.11	gene
104889853	putative ETHYLENE INSENSITIVE 3-like 4 protein	GO:0005634//nucleus	GO:0003700//DNA-binding transcription factor activity	NA	K14514//ethylene-insensitive protein 3	NA	4.771	gene
104889852	protochlorophyllide-dependent translocon component 52, chloroplastic-like	GO:0016021//integral component of membrane	GO:0051537//2 iron, 2 sulfur cluster binding;GO:0010277//chlorophyllide a oxygenase [overall] activity	NA	K13071	NA	4.771	gene
104889840	mitochondrial dicarboxylate/tricarboxylate transporter DTC	GO:0016021//integral component of membrane	GO:0005347//ATP transmembrane transporter activity	NA	K15104//solute carrier family 25 (mitochondrial oxoglutarate transporter), member 11	18.512	NA	promoter
104889838	mediator of RNA polymerase II transcription subunit 13	GO:0016592//mediator complex	GO:0003712//transcription coregulator activity	GO:0006357//regulation of transcription by RNA polymerase II	K15164//mediator of RNA polymerase II transcription subunit 13	NA	-3.022	gene
104889837	calpain-type cysteine protease DEK1	GO:0016021//integral component of membrane	GO:0004198//calcium-dependent cysteine-type endopeptidase activity	NA	K08585//calpain, invertebrate [EC:3.4.22.-];K04740//calpain-12 [EC:3.4.22.-]	NA	4.369	gene
104889835	probable lysine--tRNA ligase, cytoplasmic	GO:0005737//cytoplasm	GO:0005524//ATP binding;GO:0004824//lysine-tRNA ligase activity;GO:0003676//nucleic acid binding	GO:0006430//lysyl-tRNA aminoacylation	K04567//lysyl-tRNA synthetase, class II [EC:6.1.1.6]	NA	2.91	gene
104889832	probable receptor-like protein kinase At5g56460	#N/A	GO:0004674//protein serine/threonine kinase activity;GO:0005524//ATP binding	NA	K04733//interleukin-1 receptor-associated kinase 4 [EC:2.7.11.1]	2.729	NA	promoter
104889831	2-oxoisovalerate dehydrogenase subunit beta 1, mitochondrial-like	#N/A	GO:0003824//catalytic activity	NA	K00167//2-oxoisovalerate dehydrogenase E1 component beta subunit [EC:1.2.4.4]	2.729	0.135	both
104889818	chromosome transmission fidelity protein 18 homolog	#N/A	GO:0005524//ATP binding	NA	K11269//chromosome transmission fidelity protein 18	NA	6.232	gene
104889806	stress response protein NST1	GO:0005829//cytosol	GO:0003676//nucleic acid binding	NA	K11844//ubiquitin carboxyl-terminal hydrolase 16/45 [EC:3.4.19.12];K00030//isocitrate dehydrogenase (NAD+) [EC:1.1.1.41];K10406//kinesin family member C2/C3	NA	1.166	gene
104889799	methyltransferase-like protein 13	NA	GO:0008168//methyltransferase activity	NA	K22857//EEF1A lysine methyltransferase 4 [EC:2.1.1.-]	NA	2.492	gene
104889795	KRR1 small subunit processome component homolog	GO:0005730//nucleolus	GO:0003723//RNA binding	GO:0006364//rRNA processing	K06961//ribosomal RNA assembly protein	NA	-1.977	gene
104889782	UDP-glucuronate 4-epimerase 6	GO:0005768//endosome;GO:0016021//integral component of membrane;GO:0005802//trans-Golgi network	GO:0003824//catalytic activity	GO:0050832//defense response to fungus;GO:0050829//defense response to Gram-negative bacterium;GO:0033481//galacturonate biosynthetic process	K08679//UDP-glucuronate 4-epimerase [EC:5.1.3.6]	NA	2.822	gene
104889779	DNA repair protein RAD50	GO:0030870//Mre11 complex;GO:0005737//cytoplasm	GO:0046872//metal ion binding;GO:0016887//ATPase activity	GO:0016233//telomere capping;GO:0006302//double-strand break repair;GO:0006281//DNA repair;GO:0006312//mitotic recombination;GO:0000723//telomere maintenance	K10866//DNA repair protein RAD50 [EC:3.6.-.-]	NA	1.898	gene
104889778	serine hydroxymethyltransferase 4	#N/A	GO:0004372//glycine hydroxymethyltransferase activity;GO:0030170//pyridoxal phosphate binding	GO:0035999//tetrahydrofolate interconversion;GO:0019264//glycine biosynthetic process from serine	K00600//glycine hydroxymethyltransferase [EC:2.1.2.1]	1.964	NA	promoter
104889767	probable UDP-N-acetylglucosamine--peptide N-acetylglucosaminyltransferase SEC	#N/A	GO:0016757//transferase activity, transferring glycosyl groups	GO:0006493//protein O-linked glycosylation	K09667//protein O-GlcNAc transferase [EC:2.4.1.255]	3.822	NA	promoter
104889742	PHD finger-like domain-containing protein 5B	#N/A	NA	GO:0000398//mRNA splicing, via spliceosome	K12834//PHD finger-like domain-containing protein 5A	NA	1.376	gene
104889733	brassinosteroid-regulated protein BRU1-like	GO:0048046//apoplast;GO:0005618//cell wall	GO:0016762//xyloglucan:xyloglucosyl transferase activity;GO:0004553//hydrolase activity, hydrolyzing O-glycosyl compounds	GO:0010411//xyloglucan metabolic process;GO:0042546//cell wall biogenesis;GO:0071555//cell wall organization	K08235//xyloglucan:xyloglucosyl transferase [EC:2.4.1.207]	1.783	NA	promoter
104889719	transcription factor bHLH78	#N/A	GO:0046983//protein dimerization activity	GO:0006355//regulation of transcription, DNA-templated	K16189;K04733//interleukin-1 receptor-associated kinase 4 [EC:2.7.11.1];K11253//histone H3;K12126	4.609	NA	promoter
104889684	15-cis-zeta-carotene isomerase, chloroplastic	GO:0016021//integral component of membrane	NA	NA	K15744	NA	3.314	gene
104889683	vacuolar amino acid transporter 1	GO:0005774//vacuolar membrane;GO:0016021//integral component of membrane;GO:0005886//plasma membrane	GO:0015171//amino acid transmembrane transporter activity	GO:0003333//amino acid transmembrane transport	K15015//solute carrier family 32 (vesicular inhibitory amino acid transporter)	3.944	NA	promoter
104889674	14 kDa zinc-binding protein-like	#N/A	GO:0003824//catalytic activity	NA	K02503//histidine triad (HIT) family protein	NA	-5.383	gene
104889669	protein argonaute 4-like	#N/A	GO:0003676//nucleic acid binding	GO:0031047//gene silencing by RNA	K11593//eukaryotic translation initiation factor 2C	NA	6.062	gene
104889658	protein ZINC INDUCED FACILITATOR-LIKE 1-like	GO:0016021//integral component of membrane	GO:0022857//transmembrane transporter activity	NA	K12818//ATP-dependent RNA helicase DHX8/PRP22 [EC:3.6.4.13]	NA	4.543	gene
104889647	RNA polymerase-associated protein C651.09c-like	#N/A	GO:0003677//DNA binding	NA	K15178//RNA polymerase-associated protein RTF1	1.042	1.042	both
104889614	glucose-1-phosphate adenylyltransferase large subunit, chloroplastic/amyloplastic	GO:0009507//chloroplast	GO:0008878//glucose-1-phosphate adenylyltransferase activity;GO:0005524//ATP binding	GO:0019252//starch biosynthetic process;GO:0005978//glycogen biosynthetic process	K00975//glucose-1-phosphate adenylyltransferase [EC:2.7.7.27]	NA	1.277	gene
104889577	agamous-like MADS-box protein AGL15	GO:0005634//nucleus	GO:0000977//RNA polymerase II transcription regulatory region sequence-specific DNA binding;GO:0003700//DNA-binding transcription factor activity;GO:0046983//protein dimerization activity	GO:0045944//positive regulation of transcription by RNA polymerase II	K09264//MADS-box transcription factor, plant;K09260//MADS-box transcription enhancer factor 2A	NA	2.887	gene
104889576	inositol-pentakisphosphate 2-kinase-like	NA	GO:0035299//inositol pentakisphosphate 2-kinase activity;GO:0005524//ATP binding	NA	K10572//inositol-pentakisphosphate 2-kinase [EC:2.7.1.158]	-1.699	NA	promoter
104889545	WAT1-related protein At5g07050	GO:0016021//integral component of membrane	GO:0022857//transmembrane transporter activity	NA	K17500//integrin-linked kinase-associated serine/threonine phosphatase 2C [EC:3.1.3.16]	-1.218	NA	promoter
104889540	cytochrome P450 94A2-like	GO:0016021//integral component of membrane	GO:0016705//oxidoreductase activity, acting on paired donors, with incorporation or reduction of molecular oxygen;GO:0020037//heme binding;GO:0005506//iron ion binding;GO:0004497//monooxygenase activity	NA	K20665;K20769	-4.012	NA	promoter
104889519	putative receptor-like protein kinase At3g47110	GO:0016021//integral component of membrane;GO:0005886//plasma membrane	GO:0032440//2-alkenal reductase [NAD(P)+] activity;GO:0004712//protein serine/threonine/tyrosine kinase activity;GO:0004674//protein serine/threonine kinase activity;GO:0005524//ATP binding	GO:0046777//protein autophosphorylation	K13428	NA	3.754	gene
104889504	probable auxin efflux carrier component 1b	GO:0016021//integral component of membrane	NA	GO:0055085//transmembrane transport;GO:0009734//auxin-activated signaling pathway	K13947//auxin efflux carrier family	NA	-1.856	gene
104889502	dual specificity protein phosphatase 12-like	#N/A	GO:0008138//protein tyrosine/serine/threonine phosphatase activity;GO:0004725//protein tyrosine phosphatase activity	NA	K14819//dual specificity phosphatase 12 [EC:3.1.3.16 3.1.3.48]	NA	-1.171	gene
104889494	B3 domain-containing protein Os03g0212300-like	GO:0005634//nucleus	GO:0003677//DNA binding	NA	NA	NA	6.93	gene
104889493	microtubule-associated protein 70-1-like	#N/A	GO:0008017//microtubule binding	GO:0007010//cytoskeleton organization	K10395//kinesin family member 4/21/27;K22733//magnesium transporter;K09291//nucleoprotein TPR	1.345	1.07	both
104889477	26S protease regulatory subunit 7-like	GO:0005737//cytoplasm	GO:0008233//peptidase activity;GO:0016787//hydrolase activity;GO:0005524//ATP binding	GO:0030163//protein catabolic process	K03061//26S proteasome regulatory subunit T1	2.477	3.923	both
104889469	condensin complex subunit 1	GO:0005634//nucleus	NA	GO:0051301//cell division;GO:0007076//mitotic chromosome condensation	K06677//condensin complex subunit 1	-1.207	NA	promoter
104889467	HAUS augmin-like complex subunit 1	GO:0070652//HAUS complex	NA	GO:0051225//spindle assembly	K16584//HAUS augmin-like complex subunit 1	NA	1.263	gene
104889464	putative disease resistance protein RGA3	NA	GO:0043531//ADP binding;GO:0005524//ATP binding	GO:0006952//defense response	K15078//structure-specific endonuclease subunit SLX1 [EC:3.6.1.-]	NA	1.966	gene
104889452	pyrroline-5-carboxylate reductase	NA	GO:0004735//pyrroline-5-carboxylate reductase activity	GO:0055129//L-proline biosynthetic process	K00286//pyrroline-5-carboxylate reductase [EC:1.5.1.2]	NA	1.395	gene
104889444	probable methyltransferase PMT7	GO:0005768//endosome;GO:0005794//Golgi apparatus;GO:0016021//integral component of membrane;GO:0005802//trans-Golgi network;GO:0005737//cytoplasm	GO:0008168//methyltransferase activity	GO:0032259//methylation	K15449//tRNA wybutosine-synthesizing protein 1 [EC:4.1.3.44]	NA	1.875	gene
104889423	folylpolyglutamate synthase	#N/A	GO:0046872//metal ion binding;GO:0004326//tetrahydrofolylpolyglutamate synthase activity;GO:0005524//ATP binding	GO:0006730//one-carbon metabolic process	K01930//folylpolyglutamate synthase [EC:6.3.2.17]	-0.644	2.971	both
104889410	lichenase-like	GO:0016021//integral component of membrane	GO:0042973//glucan endo-1,3-beta-D-glucosidase activity;GO:0004553//hydrolase activity, hydrolyzing O-glycosyl compounds	GO:0005975//carbohydrate metabolic process	K19892	NA	3.247	gene
104889401	eukaryotic translation initiation factor 3 subunit E	GO:0016282//eukaryotic 43S preinitiation complex;GO:0071540//eukaryotic translation initiation factor 3 complex, eIF3e;GO:0033290//eukaryotic 48S preinitiation complex	GO:0003743//translation initiation factor activity	GO:0001732//formation of cytoplasmic translation initiation complex	K03250//translation initiation factor 3 subunit E	NA	-1.853	gene
104889398	histone-lysine N-methyltransferase, H3 lysine-9 specific SUVH6-like	GO:0005634//nucleus;GO:0005694//chromosome	GO:0008270//zinc ion binding;GO:0018024//histone-lysine N-methyltransferase activity	NA	K11420//euchromatic histone-lysine N-methyltransferase [EC:2.1.1.43]	NA	3.951	gene
104889381	zeatin O-xylosyltransferase-like	NA	GO:0016758//transferase activity, transferring hexosyl groups	NA	K13495	1.404	NA	promoter
104889374	transcription initiation factor IIB-2	#N/A	GO:0046872//metal ion binding;GO:0017025//TBP-class protein binding	GO:0006355//regulation of transcription, DNA-templated;GO:0070897//transcription preinitiation complex assembly	K03124//transcription initiation factor TFIIB	-0.514	-2.58	both
104889365	ABC transporter A family member 1	GO:0016021//integral component of membrane	GO:0005524//ATP binding;GO:0042626//ATPase-coupled transmembrane transporter activity;GO:0016887//ATPase activity	NA	K05643//ATP-binding cassette, subfamily A (ABC1), member 3	20.119	-0.177	both
104889354	magnesium-chelatase subunit ChlH, chloroplastic	#N/A	GO:0016851//magnesium chelatase activity	GO:0015995//chlorophyll biosynthetic process	K03403	NA	4.656	gene
104889352	zinc-metallopeptidase, peroxisomal	GO:0005739//mitochondrion	GO:0046872//metal ion binding;GO:0004222//metalloendopeptidase activity	GO:0051603//proteolysis involved in cellular protein catabolic process;GO:0043171//peptide catabolic process	K01408//insulysin [EC:3.4.24.56]	NA	3.332	gene
104889322	U4/U6 small nuclear ribonucleoprotein Prp31 pseudogene	GO:0046540//U4/U6 x U5 tri-snRNP complex	NA	GO:0000244//spliceosomal tri-snRNP complex assembly	K12844//U4/U6 small nuclear ribonucleoprotein PRP31	-0.733	-1.408	both
104889296	peroxidase 9	GO:0005576//extracellular region	GO:0046872//metal ion binding;GO:0020037//heme binding;GO:0004601//peroxidase activity	GO:0006979//response to oxidative stress;GO:0042744//hydrogen peroxide catabolic process	K00430//peroxidase [EC:1.11.1.7]	1.945	0.737	both
104889278	casparian strip membrane protein 3-like	GO:0016021//integral component of membrane;GO:0005886//plasma membrane	NA	NA	K11855//ubiquitin carboxyl-terminal hydrolase 36/42 [EC:3.4.19.12];K20855	-1.656	NA	promoter
104889267	protein LST8 homolog	GO:0031931//TORC1 complex;GO:0031932//TORC2 complex	NA	GO:0031929//TOR signaling	K08266//target of rapamycin complex subunit LST8	NA	-1.336	gene
104889258	zinc finger A20 and AN1 domain-containing stress-associated protein 8-like	#N/A	GO:0003677//DNA binding;GO:0008270//zinc ion binding	NA	NA	-2.288	NA	promoter
104889231	transcription factor HBP-1b(c38)	NA	GO:0043565//sequence-specific DNA binding;GO:0003700//DNA-binding transcription factor activity	GO:0006351//transcription, DNA-templated	K14431//transcription factor TGA	NA	-1.096	gene
104889226	multiple C2 and transmembrane domain-containing protein 1-like	GO:0016021//integral component of membrane	NA	NA	K04733//interleukin-1 receptor-associated kinase 4 [EC:2.7.11.1];K00549//5-methyltetrahydropteroyltriglutamate--homocysteine methyltransferase [EC:2.1.1.14];K18999	NA	1.016	gene
104889222	cyclin-T1-3-like	GO:0042025//host cell nucleus	GO:0016538//cyclin-dependent protein serine/threonine kinase regulator activity	GO:0006357//regulation of transcription by RNA polymerase II	K15188//cyclin T	NA	3.201	gene
104889207	cytokinin dehydrogenase 5	#N/A	GO:0019139//cytokinin dehydrogenase activity;GO:0071949//FAD binding	GO:0009690//cytokinin metabolic process	K00279	NA	2.585	gene
104889203	non-structural maintenance of chromosomes element 4 homolog A-like	GO:0030915//Smc5-Smc6 complex;GO:0005634//nucleus	NA	GO:0006281//DNA repair;GO:0006310//DNA recombination	K22825//non-structural maintenance of chromosomes element 4	-2.966	NA	promoter
104889194	DNA polymerase delta small subunit	#N/A	GO:0003677//DNA binding	GO:0006260//DNA replication	K02328//DNA polymerase delta subunit 2	NA	1.643	gene
104889188	DNA repair protein UVH3	GO:0005634//nucleus	GO:0003697//single-stranded DNA binding;GO:0004519//endonuclease activity	GO:0006289//nucleotide-excision repair	K10846//DNA excision repair protein ERCC-5	NA	5.446	gene
104889155	novel plant SNARE 13-like	GO:0016021//integral component of membrane	GO:0005484//SNAP receptor activity	GO:0006890//retrograde vesicle-mediated transport, Golgi to endoplasmic reticulum	K08494	NA	-5.701	gene
104889147	probable glutamate carboxypeptidase 2	GO:0016021//integral component of membrane	GO:0004181//metallocarboxypeptidase activity	GO:0010082//regulation of root meristem growth;GO:0009908//flower development;GO:0010081//regulation of inflorescence meristem growth;GO:0010305//leaf vascular tissue pattern formation;GO:0009640//photomorphogenesis;GO:0010080//regulation of floral meristem growth;GO:0009793//embryo development ending in seed dormancy	K01301//N-acetylated-alpha-linked acidic dipeptidase [EC:3.4.17.21]	NA	4.299	gene
104889144	E3 ubiquitin-protein ligase UPL6	#N/A	GO:0004842//ubiquitin-protein transferase activity	NA	K10589//ubiquitin-protein ligase E3 C [EC:2.3.2.26]	NA	-1.071	gene
104889135	polygalacturonase At1g48100	GO:0005618//cell wall;GO:0005576//extracellular region	GO:0004650//polygalacturonase activity	GO:0009831//plant-type cell wall modification involved in multidimensional cell growth;GO:0005975//carbohydrate metabolic process	K01213	-6.531	NA	promoter
104889134	solute carrier family 25 member 44-like	GO:0016021//integral component of membrane	NA	NA	K15121//solute carrier family 25, member 44	NA	3.314	gene
104889101	aminoacyl tRNA synthase complex-interacting multifunctional protein 1	#N/A	GO:0000049//tRNA binding	NA	K15437//aminoacyl tRNA synthase complex-interacting multifunctional protein 1	NA	-5.589	gene
104889093	putative tRNA (cytidine(32)/guanosine(34)-2'-O)-methyltransferase	GO:0005737//cytoplasm	GO:0008175//tRNA methyltransferase activity	GO:0002128//tRNA nucleoside ribose methylation;GO:0002181//cytoplasmic translation	K14864//tRNA (cytidine32/guanosine34-2'-O)-methyltransferase [EC:2.1.1.205]	NA	1.545	gene
104889089	guanosine nucleotide diphosphate dissociation inhibitor 1	GO:0005737//cytoplasm	GO:0017137//Rab GTPase binding;GO:0005093//Rab GDP-dissociation inhibitor activity	GO:0007264//small GTPase mediated signal transduction;GO:0015031//protein transport;GO:0016192//vesicle-mediated transport	K17255//Rab GDP dissociation inhibitor	NA	-1.572	gene
104889079	poly(ADP-ribose) glycohydrolase 1-like	#N/A	GO:0004649//poly(ADP-ribose) glycohydrolase activity	GO:0005975//carbohydrate metabolic process	K07759//poly(ADP-ribose) glycohydrolase [EC:3.2.1.143]	NA	1.711	gene
104889073	la-related protein 6B	GO:0005634//nucleus;GO:1990904//ribonucleoprotein complex	GO:0003723//RNA binding	GO:0006396//RNA processing	K15191//La-related protein 7	NA	-4.116	gene
104889063	probable thiol methyltransferase 2	#N/A	GO:0008757//S-adenosylmethionine-dependent methyltransferase activity	NA	K21552	NA	2.518	gene
104889046	acetolactate synthase small subunit 2, chloroplastic-like	#N/A	GO:1990610//acetolactate synthase regulator activity	GO:0009082//branched-chain amino acid biosynthetic process	K01653//acetolactate synthase I/III small subunit [EC:2.2.1.6]	NA	-1.628	gene
104889044	LETM1 and EF-hand domain-containing protein 1, mitochondrial-like	GO:0016021//integral component of membrane;GO:0005739//mitochondrion	GO:0043022//ribosome binding;GO:0005509//calcium ion binding	NA	K17800//LETM1 and EF-hand domain-containing protein 1, mitochondrial	NA	3.869	gene
104889038	UDP-glycosyltransferase 74E2-like	#N/A	GO:0016758//transferase activity, transferring hexosyl groups	NA	K13691	NA	3.342	gene
104889029	formin-like protein 1	GO:0016021//integral component of membrane	NA	NA	K02184//formin 2	NA	1.168	gene
104889020	probable phosphoinositide phosphatase SAC9	NA	GO:0042578//phosphoric ester hydrolase activity	NA	K22913//phosphatidylinositol 3,5-bisphosphate 5-phosphatase [EC:3.1.3.-]	NA	3.092	gene
104888986	54S ribosomal protein L51, mitochondrial	GO:0005762//mitochondrial large ribosomal subunit;GO:0005739//mitochondrion	GO:0003735//structural constituent of ribosome	GO:0032543//mitochondrial translation	K17424//large subunit ribosomal protein L43	NA	4.848	gene
104888981	G-type lectin S-receptor-like serine/threonine-protein kinase SD2-5	NA	GO:0005524//ATP binding;GO:0004672//protein kinase activity	NA	K04733//interleukin-1 receptor-associated kinase 4 [EC:2.7.11.1]	NA	1.415	gene
104888980	protein WALLS ARE THIN 1	GO:0016021//integral component of membrane	GO:0022857//transmembrane transporter activity	NA	K17500//integrin-linked kinase-associated serine/threonine phosphatase 2C [EC:3.1.3.16]	NA	-2.69	gene
104888969	wall-associated receptor kinase 4-like	GO:0016021//integral component of membrane	GO:0005524//ATP binding;GO:0004672//protein kinase activity;GO:0030247//polysaccharide binding;GO:0005509//calcium ion binding	NA	K04733//interleukin-1 receptor-associated kinase 4 [EC:2.7.11.1]	NA	2.069	gene
104888961	cysteine proteinase RD19a-like	NA	GO:0008234//cysteine-type peptidase activity	NA	K01373//cathepsin F [EC:3.4.22.41]	-2.019	NA	promoter
104888889	signal recognition particle 14 kDa protein	GO:0005786//signal recognition particle, endoplasmic reticulum targeting	GO:0030942//endoplasmic reticulum signal peptide binding;GO:0008312//7S RNA binding	GO:0006614//SRP-dependent cotranslational protein targeting to membrane	K03104//signal recognition particle subunit SRP14	NA	1.898	gene
104888853	calreticulin-3-like	GO:0005788//endoplasmic reticulum lumen;GO:0005783//endoplasmic reticulum;GO:0005789//endoplasmic reticulum membrane	GO:0051082//unfolded protein binding;GO:0005509//calcium ion binding	GO:0006457//protein folding;GO:0030968//endoplasmic reticulum unfolded protein response	K08057//calreticulin	1.575	NA	promoter
104888850	flowering time control protein FPA	#N/A	GO:0003723//RNA binding	NA	K13201//nucleolysin TIA-1/TIAR;K13190//RNA-binding protein 15	NA	2.079	gene
104888846	probable transcription factor PosF21	NA	GO:0003700//DNA-binding transcription factor activity	NA	K20557//transcription factor VIP1	NA	3.665	gene
104888845	electron transfer flavoprotein-ubiquinone oxidoreductase, mitochondrial	#N/A	GO:0004174//electron-transferring-flavoprotein dehydrogenase activity;GO:0046872//metal ion binding;GO:0051539//4 iron, 4 sulfur cluster binding	NA	K00311//electron-transferring-flavoprotein dehydrogenase [EC:1.5.5.1]	1.417	NA	promoter
104888829	B-box zinc finger protein 24	#N/A	GO:0008270//zinc ion binding	NA	K12135;K19720//collagen, type III, alpha	1.383	NA	promoter
104888781	probable LRR receptor-like serine/threonine-protein kinase At3g47570	GO:0016021//integral component of membrane	GO:0004674//protein serine/threonine kinase activity;GO:0005524//ATP binding	NA	K04733//interleukin-1 receptor-associated kinase 4 [EC:2.7.11.1];K04730//interleukin-1 receptor-associated kinase 1 [EC:2.7.11.1]	NA	-1.626	gene
104888777	ornithine carbamoyltransferase, chloroplastic	#N/A	GO:0016597//amino acid binding;GO:0004585//ornithine carbamoyltransferase activity	NA	K00611//ornithine carbamoyltransferase [EC:2.1.3.3]	-1.11	NA	promoter
104888768	actin-related protein 9	GO:0031011//Ino80 complex	NA	GO:0006338//chromatin remodeling	K11673//actin-related protein 8	NA	-5.866	gene
104888764	ethylene receptor 2	GO:0016021//integral component of membrane;GO:0005789//endoplasmic reticulum membrane	GO:0000155//phosphorelay sensor kinase activity;GO:0051740//ethylene binding;GO:0046872//metal ion binding;GO:0005524//ATP binding;GO:0038199//ethylene receptor activity	NA	K14509	NA	-4.821	gene
104888754	DNA repair protein XRCC4-like	GO:0005634//nucleus	GO:0003677//DNA binding	GO:0006302//double-strand break repair;GO:0006310//DNA recombination	K10886//DNA-repair protein XRCC4	-1.854	NA	promoter
104888752	ureidoglycolate hydrolase	#N/A	GO:0016813//hydrolase activity, acting on carbon-nitrogen (but not peptide) bonds, in linear amidines	NA	K18151//ureidoglycolate amidohydrolase [EC:3.5.1.116]	-1.854	NA	promoter
104888746	1-aminocyclopropane-1-carboxylate oxidase homolog 1-like	#N/A	GO:0046872//metal ion binding;GO:0016491//oxidoreductase activity	NA	K06892//feruloyl-CoA ortho-hydroxylase [EC:1.14.11.-];K13229	NA	2.865	gene
104888732	glucan endo-1,3-beta-glucosidase 8-like	GO:0016021//integral component of membrane	GO:0004553//hydrolase activity, hydrolyzing O-glycosyl compounds	GO:0005975//carbohydrate metabolic process	K15429//tRNA (guanine37-N1)-methyltransferase [EC:2.1.1.228];K19893//glucan endo-1,3-beta-glucosidase 5/6 [EC:3.2.1.39]	2.142	NA	promoter
104888709	adenylyl-sulfate kinase 3	NA	GO:0005524//ATP binding;GO:0004020//adenylylsulfate kinase activity	GO:0000103//sulfate assimilation;GO:0070814//hydrogen sulfide biosynthetic process	K00860//adenylylsulfate kinase [EC:2.7.1.25]	NA	2.23	gene
104888699	acetylglutamate kinase, chloroplastic	GO:0005737//cytoplasm	GO:0003991//acetylglutamate kinase activity	GO:0006526//arginine biosynthetic process	K00930	1.111	1.111	both
104888691	zinc finger A20 and AN1 domain-containing stress-associated protein 1-like	NA	GO:0003677//DNA binding;GO:0008270//zinc ion binding	NA	NA	2.598	NA	promoter
104888682	endoglucanase 8-like	#N/A	GO:0008810//cellulase activity	GO:0030245//cellulose catabolic process	K01179//endoglucanase [EC:3.2.1.4]	2.706	NA	promoter
104888681	DNA-directed RNA polymerase III subunit RPC8	GO:0005634//nucleus	NA	GO:0008380//RNA splicing;GO:0006351//transcription, DNA-templated	K03022//DNA-directed RNA polymerase III subunit RPC8	2.706	NA	promoter
104888661	40S ribosomal protein S20-2	GO:0015935//small ribosomal subunit	GO:0003735//structural constituent of ribosome	GO:0006412//translation	K02969//small subunit ribosomal protein S20e	-1.759	NA	promoter
104888660	chloride conductance regulatory protein ICln	GO:0005829//cytosol;GO:0034709//methylosome;GO:0005886//plasma membrane;GO:0034715//pICln-Sm protein complex	NA	GO:0006884//cell volume homeostasis;GO:0006821//chloride transport;GO:0000387//spliceosomal snRNP assembly	K05019//chloride channel, nucleotide-sensitive, 1A	NA	2.791	gene
104888659	probable calcium-binding protein CML13	NA	GO:0005509//calcium ion binding	NA	K13448//calcium-binding protein CML	NA	2.323	gene
104888657	probable LRR receptor-like serine/threonine-protein kinase At5g10290	GO:0016021//integral component of membrane	GO:0005524//ATP binding;GO:0004672//protein kinase activity	NA	K04733//interleukin-1 receptor-associated kinase 4 [EC:2.7.11.1]	2.663	NA	promoter
104888652	peptidyl-prolyl cis-trans isomerase FKBP53	GO:0005730//nucleolus;GO:0005829//cytosol	GO:0042393//histone binding;GO:0003755//peptidyl-prolyl cis-trans isomerase activity	GO:0006334//nucleosome assembly	K14826//FK506-binding nuclear protein [EC:5.2.1.8]	NA	4.779	gene
104888650	65-kDa microtubule-associated protein 3	NA	GO:0008017//microtubule binding	GO:0000226//microtubule cytoskeleton organization	K16732//protein regulator of cytokinesis 1	NA	-1.897	gene
104888647	DEAD-box ATP-dependent RNA helicase 8-like	#N/A	GO:0005524//ATP binding;GO:0004386//helicase activity;GO:0003676//nucleic acid binding	NA	K12614//ATP-dependent RNA helicase DDX6/DHH1 [EC:3.6.4.13]	3.458	NA	promoter
104888646	protein YLS7-like	GO:0016021//integral component of membrane	NA	NA	NA	-2.636	NA	promoter
104888632	cytokinin hydroxylase	GO:0016021//integral component of membrane	GO:0016705//oxidoreductase activity, acting on paired donors, with incorporation or reduction of molecular oxygen;GO:0020037//heme binding;GO:0005506//iron ion binding;GO:0004497//monooxygenase activity	NA	K07425//long-chain fatty acid omega-monooxygenase [EC:1.14.14.80]	NA	1.735	gene
104888624	probable LRR receptor-like serine/threonine-protein kinase At2g28960	NA	GO:0005524//ATP binding;GO:0004672//protein kinase activity	NA	K04733//interleukin-1 receptor-associated kinase 4 [EC:2.7.11.1]	-0.942	21.619	both
104888612	dirigent protein 21-like	GO:0048046//apoplast	NA	NA	K01870//isoleucyl-tRNA synthetase [EC:6.1.1.5];K19027//zinc finger FYVE domain-containing protein 26	-2.087	-0.301	both
104888610	UPF0481 protein At3g47200-like	GO:0016021//integral component of membrane	NA	NA	K07393//glutathionyl-hydroquinone reductase [EC:1.8.5.7]	-2.787	NA	promoter
[truncated: 421 more rows]
