# Supplementary material for: The Effects of DNA Methylation on Cytoplasmic Male Sterility in Sugar Beet
Source: Int J Mol Sci. 2024 Jan 17;25(2):1118. doi: 10.3390/ijms25021118 (PMC10817047; doi:10.3390/ijms25021118)
Supplement: Supplementary file 1 [file ijms-25-01118-s001.zip › Table S1.xls]

## Sheet: Bisulfite PCR
		DY5CMS	DY5O
BVRB_7g157750	BS-Seq	0.124934	0.129412
	Bisulfite PCR	0.26829	0.285714
BVRB_5g121390	BS-Seq	0.139552	0.101406
	Bisulfite PCR	0.10606	0.07575
BVRB_1g006690	BS-Seq	0.0931113	0.0534301
	Bisulfite PCR	0.03225	0.01612

## Sheet: qRT-pcr
Table S1: 12 DMG methylation levels and expression levels.
DMGs	methylation level of DMGs	expression ofDMGs	SD
BVRB_9g208010	2.38	0.611197	0.103507
BVRB_2g047050	2.558	1.37247	0.113769
BVRB_7g164820	-2.343	2.18336	0.643905
BVRB_3g061680	-2.591	5.69806	0.145648
BVRB_6g142820	2.709	3.46184	0.682874
BVRB_2g036990	3.456	0.976706	0.0873854
BVRB_4g075270	18.985	0.0739453	0.00437618
BVRB_6g133580	-2.591	1.2665	0.159164
BVRB_4g073090	-1.3	1.58636	0.174522
BVRB_3g049380	-3.894	0.845753	0.142825
BVRB_7g172330	-1.659	1.32722	0.203446
BVRB_6g137940	19.007	0.937063	0.105758
